# Supplementary material for: Halogen bond catalysis of the [4+2] cycloaddition reaction of 2-alkenylindoles: catalytic modes and stereoselectivity
Source: Royal Society of Chemistry journal article supplement (doi:10.1039/d3cp05479a), 2023-12-04
Supplement: d3cp05479a1.pdf [file d3cp05479a1.pdf]

## Halogen bond catalysis of the [4+2] cycloaddition reaction of 2-alkenylindoles: catalytic modes and stereoselectivity

Ying Li, Chang Zhao, Huaiyu Zhang\*, Yanli Zeng\*

*College of Chemistry and materials science, Hebei Normal University, Shijiazhuang,  
050024, China*

Table S1. The I...C5 and I...C6 distances (in Å) in COM1a-endo catalysed by I<sub>2</sub>, IBr, and ICl.

| endo                        | I...C5 | I...C6 |
|-----------------------------|--------|--------|
| COM1a(I <sub>2</sub> )-endo | 3.181  | 3.093  |
| COM1a(IBr)-endo             | 2.969  | 2.821  |
| COM1a(ICl)-endo             | 2.821  | 2.642  |

Table S2. The I...C5 and I...C6 distances (in Å) in COM1a-exo catalysed by I<sub>2</sub>, IBr, and ICl.

| exo                        | I...C5 | I...C6 |
|----------------------------|--------|--------|
| COM1a(I <sub>2</sub> )-exo | 3.184  | 3.077  |
| COM1a(IBr)-exo             | 2.966  | 2.811  |
| COM1a(ICl)-exo             | 2.816  | 2.639  |

Table S3-S88. Calculated Gibbs free energy and XYZ coordinates.

Table S3. Calculated Gibbs free energy and XYZ coordinates for all atoms in **COM1-endo** without catalysts.

$G = -882.0114$  Hartree

|   |             |             |             |
|---|-------------|-------------|-------------|
| C | 2.93146200  | -0.08696000 | 0.71080100  |
| C | 2.71452500  | -1.10025200 | -0.25653300 |
| C | 3.71374900  | -1.34454200 | -1.21454400 |
| C | 4.86628800  | -0.58249100 | -1.19021700 |
| C | 5.05368000  | 0.42785700  | -0.22541500 |
| C | 4.09371600  | 0.68861500  | 0.73529500  |
| C | 0.89760100  | -0.97806300 | 1.08542500  |
| C | 1.41811400  | -1.64922100 | 0.00184800  |
| H | 3.57798400  | -2.11745400 | -1.96247600 |
| H | 5.64235800  | -0.75994100 | -1.92506700 |
| H | 5.96734600  | 1.00981100  | -0.23706700 |
| H | 4.23344500  | 1.46344200  | 1.47982300  |
| H | 0.93663200  | -2.45336400 | -0.53284300 |
| C | -0.39124300 | -1.08552900 | 1.76165200  |
| H | -0.53275200 | -0.43380800 | 2.61947200  |
| C | -1.38017000 | -1.89017800 | 1.37809600  |

|   |             |             |             |
|---|-------------|-------------|-------------|
| H | -2.32633100 | -1.90704400 | 1.90430600  |
| H | -1.28289300 | -2.54235100 | 0.51681800  |
| N | 1.82442400  | -0.05201000 | 1.51769200  |
| C | -2.57799900 | -0.06001600 | -0.87339200 |
| C | -3.01169600 | 0.91573000  | 0.05919300  |
| C | -4.31839900 | 0.83134400  | 0.56858500  |
| C | -5.13835000 | -0.19735200 | 0.14536700  |
| C | -4.68673500 | -1.15295100 | -0.78790900 |
| C | -3.40791600 | -1.09680100 | -1.31042000 |
| C | -0.86146400 | 1.34121000  | -0.48522200 |
| C | -1.90604500 | 1.79269100  | 0.28718700  |
| H | -4.67443700 | 1.56302300  | 1.28500800  |
| H | -6.14766900 | -0.27376700 | 0.53178600  |
| H | -5.35571600 | -1.94539500 | -1.10149400 |
| H | -3.05710800 | -1.83167000 | -2.02573700 |
| H | -1.87658000 | 2.64125000  | 0.95289100  |
| C | 0.50526500  | 1.83119000  | -0.63793000 |
| H | 1.20860500  | 1.13566700  | -1.09223300 |
| C | 0.92821300  | 3.03385500  | -0.25199100 |
| H | 0.25500300  | 3.76021900  | 0.19047600  |
| N | -1.27723300 | 0.22944100  | -1.18921600 |
| H | -0.67012500 | -0.33485100 | -1.76369100 |
| H | 1.65101400  | 0.63480700  | 2.23507400  |
| H | 1.96532200  | 3.32060400  | -0.37362400 |

Table S4. Calculated Gibbs free energy and XYZ coordinates for all atoms in **TS1-endo** without catalysts.

$G = -881.9603$  Hartree      Frequency =  $-568.46 \text{ cm}^{-1}$

|   |            |             |             |
|---|------------|-------------|-------------|
| C | 3.50580500 | -0.25054600 | -0.34316200 |
| C | 2.63931400 | 0.87227800  | -0.32953600 |
| C | 3.18859700 | 2.14281100  | -0.09930500 |
| C | 4.55313700 | 2.26161000  | 0.10529900  |
| C | 5.39252100 | 1.13372300  | 0.08251500  |
| C | 4.88143100 | -0.13495600 | -0.14416600 |
| C | 1.40617200 | -0.98538600 | -0.73063100 |
| C | 1.31602200 | 0.38048400  | -0.57698600 |
| H | 2.55088600 | 3.01965500  | -0.08511900 |
| H | 4.98557600 | 3.23899900  | 0.28389100  |
| H | 6.45660500 | 1.25778500  | 0.24410300  |
| H | 5.52583400 | -1.00619100 | -0.16379300 |
| H | 0.40636200 | 0.95984300  | -0.62084400 |
| C | 0.35579500 | -1.97176000 | -0.91170400 |
| H | 0.66301300 | -2.98843300 | -1.12763200 |

|   |             |             |             |
|---|-------------|-------------|-------------|
| C | -0.92253300 | -1.54338000 | -1.29461200 |
| H | -1.56059600 | -2.24655000 | -1.81650600 |
| H | -1.04077600 | -0.51550900 | -1.61764200 |
| N | 2.72817900  | -1.35916900 | -0.58221600 |
| C | -2.85743900 | 0.88169200  | 0.65566500  |
| C | -3.21189200 | -0.28888500 | -0.04751800 |
| C | -4.30067700 | -0.26604800 | -0.91787500 |
| C | -5.01166400 | 0.91665300  | -1.07553200 |
| C | -4.63824100 | 2.07302700  | -0.37630700 |
| C | -3.55976800 | 2.07575000  | 0.49762700  |
| C | -1.39846400 | -0.73045400 | 1.29140500  |
| C | -2.22906800 | -1.31037600 | 0.29210400  |
| H | -4.58434100 | -1.15862400 | -1.46450600 |
| H | -5.86115700 | 0.95047800  | -1.74636200 |
| H | -5.20464800 | 2.98576700  | -0.51833000 |
| H | -3.27566800 | 2.97045700  | 1.03844200  |
| H | -2.46933100 | -2.36356300 | 0.29850100  |
| C | -0.24588100 | -1.32920600 | 1.80004800  |
| H | 0.45439600  | -0.73198300 | 2.37361600  |
| C | 0.13277100  | -2.54888500 | 1.28362800  |
| H | -0.60586700 | -3.25489200 | 0.92865700  |
| N | -1.77618300 | 0.59091400  | 1.46186800  |
| H | -1.23915200 | 1.27125900  | 1.97583800  |
| H | 3.06684900  | -2.30480700 | -0.65937900 |
| H | 1.09242000  | -2.97478900 | 1.55375900  |

Table S5. Calculated Gibbs free energy and XYZ coordinates for all atoms in **1-endo** without catalysts.

$G = -882.0295$  Hartree

|   |            |             |             |
|---|------------|-------------|-------------|
| C | 3.81918100 | -0.23734800 | -0.36374100 |
| C | 3.13605100 | 0.92313800  | 0.07290000  |
| C | 3.88654600 | 2.04232400  | 0.46360100  |
| C | 5.26760700 | 1.97859900  | 0.40778600  |
| C | 5.92468500 | 0.81507000  | -0.03441200 |
| C | 5.21256000 | -0.30554300 | -0.42653100 |
| C | 1.60291300 | -0.64816900 | -0.47317900 |
| C | 1.73162800 | 0.63401700  | -0.00719300 |
| H | 3.38861300 | 2.94331300  | 0.80379800  |
| H | 5.85725800 | 2.83674300  | 0.70751600  |
| H | 7.00742700 | 0.79605000  | -0.06809700 |
| H | 5.71580500 | -1.20296100 | -0.76694700 |
| H | 0.92267000 | 1.29384400  | 0.26350800  |
| C | 0.39675300 | -1.51988700 | -0.66904800 |

|   |             |             |             |
|---|-------------|-------------|-------------|
| H | 0.64347800  | -2.24602000 | -1.45019600 |
| C | -0.83887900 | -0.70301200 | -1.12672600 |
| H | -1.00787700 | -0.84451000 | -2.19621100 |
| H | -0.66059600 | 0.36237700  | -0.97392000 |
| N | 2.86336000  | -1.17254300 | -0.68196900 |
| C | -3.58919400 | 0.38982400  | 0.79144500  |
| C | -3.26455700 | -0.11012900 | -0.47922700 |
| C | -3.97233600 | 0.30697800  | -1.58955600 |
| C | -5.00817000 | 1.23443300  | -1.43081700 |
| C | -5.31690300 | 1.72466800  | -0.16591500 |
| C | -4.61471000 | 1.30938900  | 0.96705100  |
| C | -1.79213900 | -0.98156200 | 1.14331600  |
| C | -2.10900100 | -1.07151100 | -0.33705100 |
| H | -3.72571500 | -0.07623900 | -2.57400600 |
| H | -5.56871000 | 1.57252900  | -2.29326100 |
| H | -6.11892200 | 2.44468500  | -0.05246200 |
| H | -4.86043200 | 1.69411600  | 1.94952100  |
| H | -2.41197100 | -2.09418000 | -0.59610600 |
| C | -0.69077400 | -1.55621300 | 1.63163100  |
| H | -0.39071800 | -1.47301800 | 2.66845100  |
| C | 0.12521100  | -2.33720400 | 0.63535400  |
| H | -0.40659400 | -3.25251700 | 0.34590700  |
| N | -2.76136500 | -0.18700200 | 1.75004100  |
| H | -2.66190100 | 0.18020400  | 2.68297100  |
| H | 3.04700200  | -2.09334200 | -1.04818000 |
| H | 1.07838800  | -2.65142500 | 1.06308300  |

Table S6. Calculated Gibbs free energy and XYZ coordinates for all atoms in **COM1-exo** without catalysts.

$G = -882.0089$  Hartree

|   |             |             |             |
|---|-------------|-------------|-------------|
| C | -3.32449700 | -0.31028600 | 0.41258600  |
| C | -2.54748700 | 0.87175400  | 0.51613000  |
| C | -3.09762300 | 2.08500700  | 0.06755300  |
| C | -4.37298300 | 2.08710600  | -0.46396700 |
| C | -5.12516700 | 0.89881900  | -0.55951300 |
| C | -4.61531800 | -0.31081800 | -0.12449800 |
| C | -1.33104900 | -0.86097200 | 1.30357200  |
| C | -1.29284400 | 0.49575500  | 1.09065400  |
| H | -2.52564400 | 3.00328200  | 0.13765300  |
| H | -4.80705700 | 3.01556900  | -0.81510300 |
| H | -6.12202900 | 0.93442400  | -0.98225100 |
| H | -5.19243900 | -1.22521900 | -0.19639100 |
| H | -0.45917700 | 1.14168100  | 1.31797900  |

|   |             |             |             |
|---|-------------|-------------|-------------|
| C | -0.32126600 | -1.77324000 | 1.82868800  |
| H | -0.67562100 | -2.75493600 | 2.13298400  |
| C | 0.97192600  | -1.47282800 | 1.94085500  |
| H | 1.36305600  | -0.51269200 | 1.61846200  |
| H | 1.67549800  | -2.18527000 | 2.35361100  |
| N | -2.56850200 | -1.33817000 | 0.91338900  |
| C | 3.32477000  | -0.31029900 | -0.41336600 |
| C | 2.54720000  | 0.87152100  | -0.51518600 |
| C | 3.09740700  | 2.08466500  | -0.06638800 |
| C | 4.37346300  | 2.08689600  | 0.46345500  |
| C | 5.12626100  | 0.89884700  | 0.55715100  |
| C | 4.61631300  | -0.31069100 | 0.12198400  |
| C | 1.33053400  | -0.86106700 | -1.30258200 |
| C | 1.29208700  | 0.49549500  | -1.08863600 |
| H | 2.52497200  | 3.00276100  | -0.13509700 |
| H | 4.80762200  | 3.01528300  | 0.81468700  |
| H | 6.12368200  | 0.93456900  | 0.97855900  |
| H | 5.19388700  | -1.22491400 | 0.19248600  |
| H | 0.45789800  | 1.14131200  | -1.31432200 |
| C | 0.32060900  | -1.77324100 | -1.82759800 |
| H | 0.67471800  | -2.75513300 | -2.13152800 |
| C | -0.97244900 | -1.47237100 | -1.94007900 |
| H | -1.36309900 | -0.51188900 | -1.61813200 |
| N | 2.56849300  | -1.33812600 | -0.91386400 |
| H | -2.83387600 | -2.31036800 | 0.91512700  |
| H | 2.83466100  | -2.31009700 | -0.91761000 |
| H | -1.67631500 | -2.18461100 | -2.35267200 |

Table S7. Calculated Gibbs free energy and XYZ coordinates for all atoms in **TS1-exo** without catalysts.

$G = -881.9604$  Hartree    Frequency =  $-575.66$   $\text{cm}^{-1}$

|   |            |             |             |
|---|------------|-------------|-------------|
| C | 3.87654600 | 0.31206300  | 0.32855900  |
| C | 3.30784900 | -0.92813500 | -0.05703000 |
| C | 4.14696900 | -1.91476200 | -0.59660200 |
| C | 5.49876600 | -1.64840900 | -0.73490400 |
| C | 6.04013400 | -0.41123700 | -0.34299700 |
| C | 5.23803600 | 0.58339400  | 0.19453500  |
| C | 1.66281000 | 0.39326800  | 0.77463400  |
| C | 1.90577400 | -0.85079500 | 0.22931300  |
| H | 3.73969300 | -2.87260600 | -0.90015800 |
| H | 6.15424500 | -2.40426900 | -1.15100700 |
| H | 7.10191000 | -0.23220900 | -0.46254300 |

|   |             |             |             |
|---|-------------|-------------|-------------|
| H | 5.65231600  | 1.53767400  | 0.49835500  |
| H | 1.17102900  | -1.62461000 | 0.06809600  |
| C | 0.41580300  | 1.01735500  | 1.17334200  |
| H | 0.47907900  | 1.97169500  | 1.67885200  |
| C | -0.75063200 | 0.24941300  | 1.28127600  |
| H | -0.64585400 | -0.82806700 | 1.35142000  |
| H | -1.57506700 | 0.64689200  | 1.86269800  |
| N | 2.85485900  | 1.09158200  | 0.81823000  |
| C | -4.01107000 | 0.27802800  | -0.21222900 |
| C | -2.95392000 | -0.65325900 | -0.27457000 |
| C | -3.21766800 | -2.00832400 | -0.08046300 |
| C | -4.52292900 | -2.41027300 | 0.17059800  |
| C | -5.56031600 | -1.46915000 | 0.23545900  |
| C | -5.32361600 | -0.11473700 | 0.04650600  |
| C | -2.13062500 | 1.45164000  | -0.67885300 |
| C | -1.72419900 | 0.10096700  | -0.48581500 |
| H | -2.41406300 | -2.73518600 | -0.12589000 |
| H | -4.74535400 | -3.45954800 | 0.31986100  |
| H | -6.57062700 | -1.80552700 | 0.43579300  |
| H | -6.12805100 | 0.60915600  | 0.09556400  |
| H | -0.86293700 | -0.31857400 | -0.99197600 |
| C | -1.24952900 | 2.53205700  | -0.77146400 |
| H | -1.62589500 | 3.53782600  | -0.61516300 |
| C | 0.10085400  | 2.27830000  | -0.77783600 |
| H | 0.49317200  | 1.36181100  | -1.19826500 |
| N | -3.49313600 | 1.53332300  | -0.45547600 |
| H | 2.95451100  | 2.02650700  | 1.18053900  |
| H | -4.01380100 | 2.39463300  | -0.41041900 |
| H | 0.80940000  | 3.09562800  | -0.70378800 |

Table S8. Calculated Gibbs free energy and XYZ coordinates for all atoms in **1-exo** without catalysts.

$G = -882.0300$  Hartree

|   |             |             |             |
|---|-------------|-------------|-------------|
| C | -3.89624900 | -0.32501900 | 0.21151700  |
| C | -3.32510400 | 0.92875000  | -0.11252000 |
| C | -4.16653100 | 1.96272700  | -0.54870900 |
| C | -5.52661700 | 1.72664100  | -0.64595900 |
| C | -6.07235500 | 0.47282800  | -0.31392600 |
| C | -5.26809600 | -0.56766600 | 0.11923900  |
| C | -1.67000700 | -0.46403700 | 0.55028500  |
| C | -1.91052900 | 0.81135300  | 0.11148900  |
| H | -3.75468500 | 2.93226500  | -0.80517900 |
| H | -6.18608100 | 2.51770500  | -0.98242000 |

|   |             |             |             |
|---|-------------|-------------|-------------|
| H | -7.14134300 | 0.31869900  | -0.39933400 |
| H | -5.68592100 | -1.53437100 | 0.37486100  |
| H | -1.16938100 | 1.58008000  | -0.04204300 |
| C | -0.39098900 | -1.18221500 | 0.86518800  |
| H | -0.53581400 | -1.71967400 | 1.80733100  |
| C | 0.79172400  | -0.20832900 | 1.05753700  |
| H | 0.43087900  | 0.78254500  | 1.33944200  |
| H | 1.42403700  | -0.56330000 | 1.87381800  |
| N | -2.86711200 | -1.14921200 | 0.60313500  |
| C | 4.03195400  | -0.22211700 | -0.33673500 |
| C | 2.95934200  | 0.64030000  | -0.06315200 |
| C | 3.19715700  | 1.96097300  | 0.26325400  |
| C | 4.51688300  | 2.42247700  | 0.32374700  |
| C | 5.57117100  | 1.55572400  | 0.05397400  |
| C | 5.34716300  | 0.21938700  | -0.28313600 |
| C | 2.16723400  | -1.53928000 | -0.48794200 |
| C | 1.67128200  | -0.13454500 | -0.20034600 |
| H | 2.37075600  | 2.63145600  | 0.47421500  |
| H | 4.71818300  | 3.45456400  | 0.58179500  |
| H | 6.59020700  | 1.92108700  | 0.10495500  |
| H | 6.17259400  | -0.44983700 | -0.49385400 |
| H | 1.07012000  | 0.23980200  | -1.03972800 |
| C | 1.32912100  | -2.57675500 | -0.45050300 |
| H | 1.65816100  | -3.59910100 | -0.59047900 |
| C | -0.12953400 | -2.25386000 | -0.25127400 |
| H | -0.55111600 | -1.85854100 | -1.18397600 |
| N | 3.54792200  | -1.48633800 | -0.66340800 |
| H | -2.96946200 | -2.10091100 | 0.91871000  |
| H | 4.12773200  | -2.31045800 | -0.66839700 |
| H | -0.69665600 | -3.15719100 | -0.01997800 |

Table S9. Calculated Gibbs free energy and XYZ coordinates for all atoms in **COM1a-endo** catalysed by I<sub>2</sub>.

$G = -1473.2985$  Hartree

|   |             |             |             |
|---|-------------|-------------|-------------|
| I | -2.33268100 | -0.61282600 | -0.02335500 |
| C | 1.46853500  | 3.01986300  | -0.57146800 |
| C | 1.51716500  | 2.85656300  | 0.83522800  |
| C | 1.80888000  | 3.97301500  | 1.63774500  |
| C | 2.03759200  | 5.19223200  | 1.03030400  |
| C | 1.97889200  | 5.33117600  | -0.37193300 |
| C | 1.69382100  | 4.25343200  | -1.18921500 |
| C | 1.07925600  | 0.85398100  | -0.10993600 |
| C | 1.26421100  | 1.47586000  | 1.10316900  |

|   |             |             |             |
|---|-------------|-------------|-------------|
| H | 1.85356600  | 3.87495500  | 2.71643400  |
| H | 2.26375800  | 6.06084600  | 1.63695600  |
| H | 2.16079400  | 6.30236200  | -0.81624600 |
| H | 1.65195000  | 4.35744700  | -2.26700700 |
| H | 1.23432600  | 0.99629300  | 2.06942900  |
| C | 0.81991500  | -0.53910600 | -0.44229600 |
| H | 0.84765800  | -0.79146200 | -1.49930600 |
| C | 0.58906500  | -1.50999600 | 0.45244600  |
| H | 0.46433000  | -2.53886400 | 0.13676600  |
| H | 0.57640500  | -1.31005000 | 1.51894800  |
| N | 1.19665200  | 1.79162900  | -1.11470700 |
| C | 3.57028100  | -2.38124300 | 0.71035900  |
| C | 3.65591200  | -2.48126700 | -0.70059300 |
| C | 3.37863700  | -3.71712100 | -1.30774700 |
| C | 3.03263500  | -4.79340200 | -0.51165800 |
| C | 2.96278900  | -4.67100400 | 0.89066100  |
| C | 3.23186500  | -3.46871200 | 1.51951100  |
| C | 4.09142600  | -0.34593200 | -0.10078800 |
| C | 3.99272900  | -1.18029500 | -1.19023700 |
| H | 3.43161400  | -3.82188800 | -2.38553100 |
| H | 2.81428900  | -5.75110400 | -0.96881400 |
| H | 2.69295700  | -5.53488000 | 1.48616000  |
| H | 3.17285000  | -3.36870100 | 2.59706200  |
| H | 4.14725400  | -0.89549000 | -2.21943400 |
| C | 4.37565900  | 1.08188900  | 0.00265200  |
| H | 4.43935900  | 1.48030000  | 1.01165900  |
| C | 4.52662500  | 1.90495800  | -1.03274700 |
| H | 4.45025900  | 1.55359300  | -2.05638400 |
| N | 3.84399600  | -1.07892900 | 1.04179200  |
| H | 3.82237800  | -0.69456000 | 1.97339700  |
| H | 1.12330600  | 1.58874900  | -2.09936900 |
| H | 4.71447800  | 2.96036200  | -0.88082600 |
| I | -4.98055300 | -0.11521500 | -0.04012100 |

Table S10. Calculated Gibbs free energy and XYZ coordinates for all atoms in **TS1a-endo** catalysed by I<sub>2</sub>.

$G = -1473.2628$  Hartree      Frequency =  $-401.71$  cm<sup>-1</sup>

|   |             |             |             |
|---|-------------|-------------|-------------|
| I | 2.04637800  | -0.35666000 | 0.35861100  |
| C | -1.17293600 | 3.44012200  | 0.16543000  |
| C | -1.72917400 | 2.76711700  | -0.95081100 |
| C | -2.38598200 | 3.51994000  | -1.93754800 |
| C | -2.47231500 | 4.89193200  | -1.78717600 |



|   |             |             |             |
|---|-------------|-------------|-------------|
| C | -1.91168100 | 5.53846100  | -0.66912500 |
| C | -1.25472700 | 4.82540600  | 0.31882000  |
| C | -0.78120500 | 1.23880400  | 0.41829000  |
| C | -1.46355300 | 1.37166500  | -0.76947700 |
| H | -2.81292000 | 3.03096400  | -2.80581300 |
| H | -2.97506800 | 5.48409600  | -2.54230100 |
| H | -1.99374100 | 6.61509000  | -0.58191000 |
| H | -0.81789400 | 5.32105500  | 1.17745800  |
| H | -1.74491600 | 0.56880500  | -1.43331800 |
| C | -0.33309600 | 0.04373700  | 1.11753300  |
| H | -0.08354400 | 0.17184200  | 2.16670000  |
| C | -0.79544500 | -1.22178500 | 0.70128400  |
| H | -0.41101600 | -2.10058300 | 1.20430300  |
| H | -1.01751300 | -1.36457300 | -0.35152200 |
| N | -0.59669900 | 2.48715600  | 0.97021500  |
| C | -3.86269100 | -2.16602300 | -0.60252000 |
| C | -3.07394000 | -2.74471600 | 0.40919100  |
| C | -2.70571300 | -4.08788500 | 0.30412600  |
| C | -3.14559100 | -4.81070500 | -0.79419900 |
| C | -3.93201400 | -4.21229500 | -1.79178300 |
| C | -4.30114700 | -2.87847900 | -1.71517000 |
| C | -3.46857700 | -0.54974400 | 0.92010100  |
| C | -2.73776800 | -1.68437200 | 1.34340400  |
| H | -2.09448600 | -4.55492300 | 1.06751100  |
| H | -2.87830900 | -5.85584000 | -0.88841700 |
| H | -4.25611200 | -4.80430100 | -2.63858100 |
| H | -4.90579500 | -2.41136500 | -2.48240100 |
| H | -2.44796300 | -1.84053600 | 2.37151500  |
| C | -3.60034100 | 0.74281500  | 1.56006000  |
| H | -4.10817500 | 1.51746100  | 0.99380200  |
| C | -3.11367600 | 1.00339000  | 2.77570400  |
| H | -2.60752900 | 0.24692900  | 3.36495800  |
| N | -4.07895300 | -0.84017500 | -0.25273600 |
| H | -4.59913400 | -0.17205800 | -0.80451300 |
| H | -0.12813000 | 2.66393300  | 1.84504000  |
| H | -3.21611800 | 1.98816100  | 3.21289100  |
| I | 4.84564800  | -0.51498800 | -0.39624400 |

Table S11. Calculated Gibbs free energy and XYZ coordinates for all atoms in **INT1a-endo** catalysed by I<sub>2</sub>.

$G = -1473.2885$  Hartree

|   |             |             |            |
|---|-------------|-------------|------------|
| I | 1.91829400  | -0.12761200 | 0.30657200 |
| C | -1.51215200 | 3.32449500  | 0.13751500 |

|   |             |             |             |
|---|-------------|-------------|-------------|
| C | -2.05627600 | 2.65721900  | -0.98470300 |
| C | -2.87012400 | 3.37535300  | -1.87395700 |
| C | -3.11448300 | 4.71332700  | -1.62289900 |
| C | -2.55844100 | 5.35710200  | -0.50138600 |
| C | -1.74982400 | 4.67612000  | 0.39190900  |
| C | -0.83016500 | 1.18269300  | 0.21090400  |
| C | -1.60445700 | 1.29592700  | -0.91801700 |
| H | -3.29144700 | 2.88958900  | -2.74652700 |
| H | -3.73774600 | 5.28187200  | -2.30233400 |
| H | -2.76414000 | 6.40771000  | -0.33656800 |
| H | -1.31508600 | 5.17137600  | 1.25175300  |
| H | -1.82101300 | 0.51059500  | -1.62575500 |
| C | -0.21682100 | -0.01106300 | 0.83164800  |
| H | -0.18659300 | 0.09801700  | 1.91625400  |
| C | -0.88908900 | -1.31088200 | 0.42413800  |
| H | -0.26847900 | -2.15666600 | 0.72175100  |
| H | -0.97990900 | -1.35591200 | -0.66312600 |
| N | -0.77224700 | 2.40055300  | 0.84221200  |
| C | -3.98335500 | -2.39797500 | -0.38054800 |
| C | -2.86664100 | -2.80105500 | 0.34376600  |
| C | -2.41430500 | -4.10353900 | 0.22539900  |
| C | -3.12084700 | -4.97144300 | -0.60803400 |
| C | -4.23987900 | -4.54182800 | -1.32199800 |
| C | -4.69676400 | -3.23003200 | -1.22312300 |
| C | -3.35883600 | -0.55620800 | 0.79325400  |
| C | -2.29636200 | -1.59936800 | 1.05693200  |
| H | -1.54147200 | -4.44633000 | 0.76757500  |
| H | -2.79260500 | -5.99842300 | -0.70488500 |
| H | -4.76287500 | -5.23767500 | -1.96522300 |
| H | -5.56159200 | -2.88240500 | -1.77318900 |
| H | -2.17925000 | -1.74370700 | 2.13426800  |
| C | -3.56515700 | 0.72897000  | 1.41983500  |
| H | -4.28213300 | 1.39098400  | 0.94512600  |
| C | -2.96062500 | 1.07653100  | 2.55807400  |
| H | -2.25957800 | 0.42214100  | 3.06390000  |
| N | -4.22768200 | -1.04058800 | -0.05922400 |
| H | -5.03951400 | -0.52281000 | -0.38301900 |
| H | -0.21957800 | 2.59561700  | 1.66359600  |
| H | -3.17224800 | 2.03100300  | 3.02258500  |
| I | 5.37609000  | -0.42259200 | -0.34844600 |

Table S12. Calculated Gibbs free energy and XYZ coordinates for all atoms in **TS2a-**

endo catalysed by I<sub>2</sub>.

G= -1473.2520 Hartree    Frequency = -472.70 cm<sup>-1</sup>

|   |             |             |             |
|---|-------------|-------------|-------------|
| I | 2.05671900  | -0.41354400 | 0.43830900  |
| C | -0.74350200 | 3.41899700  | 0.10919100  |
| C | -1.52229800 | 2.75151700  | -0.86900200 |
| C | -2.12697500 | 3.50814000  | -1.88273400 |
| C | -1.94412800 | 4.88132000  | -1.89874100 |
| C | -1.16362500 | 5.52048600  | -0.92046300 |
| C | -0.55175200 | 4.79958200  | 0.09419200  |
| C | -0.71260500 | 1.21311800  | 0.58552200  |
| C | -1.48810400 | 1.35442300  | -0.54617700 |
| H | -2.72439000 | 3.02182900  | -2.64568400 |
| H | -2.40518200 | 5.47501500  | -2.67902700 |
| H | -1.03503800 | 6.59545400  | -0.96031800 |
| H | 0.05318300  | 5.29009800  | 0.84765700  |
| H | -1.96447900 | 0.55492600  | -1.09291300 |
| C | -0.46027400 | 0.02130300  | 1.35797800  |
| H | 0.13967100  | 0.07474800  | 2.25698000  |
| C | -1.02823800 | -1.26705400 | 0.84861600  |
| H | -0.45429400 | -2.11672800 | 1.21686000  |
| H | -0.96080300 | -1.28389100 | -0.23991100 |
| N | -0.27702900 | 2.46267300  | 0.98339200  |
| C | -4.32076300 | -1.68180100 | -0.37127100 |
| C | -3.23989200 | -2.41980100 | 0.12321900  |
| C | -2.93780500 | -3.65122100 | -0.43343600 |
| C | -3.73117300 | -4.12710000 | -1.47802300 |
| C | -4.80439300 | -3.37535400 | -1.95693800 |
| C | -5.11945100 | -2.13324800 | -1.41125400 |
| C | -3.44151100 | -0.40984700 | 1.28908900  |
| C | -2.56768800 | -1.61468500 | 1.19763800  |
| H | -2.09969800 | -4.23346100 | -0.06784700 |
| H | -3.51053300 | -5.08838600 | -1.92447100 |
| H | -5.40524600 | -3.76164000 | -2.77104800 |
| H | -5.94903100 | -1.54546200 | -1.78402700 |
| H | -2.54152100 | -2.13576400 | 2.15795500  |
| C | -3.15484100 | 0.64004200  | 2.15018500  |
| H | -3.62988400 | 1.60439100  | 2.01692500  |
| C | -2.05467600 | 0.47936400  | 2.97249900  |
| H | -1.78634800 | -0.49640200 | 3.35554900  |
| N | -4.41287700 | -0.48964600 | 0.35645200  |
| H | -5.08507300 | 0.24183400  | 0.17430400  |
| H | 0.35150800  | 2.63223700  | 1.75272200  |
| H | -1.66847100 | 1.32405000  | 3.53110200  |

|   |            |             |             |
|---|------------|-------------|-------------|
| I | 4.66379300 | -0.85840100 | -0.55688000 |
|---|------------|-------------|-------------|

Table S13. Calculated Gibbs free energy and XYZ coordinates for all atoms in **2a-endo** catalysed by I<sub>2</sub>.

$G = -1473.3202$  Hartree

|   |             |             |             |
|---|-------------|-------------|-------------|
| I | 1.77278600  | -0.23023200 | -0.00580800 |
| C | -0.35004500 | 2.97292000  | 0.14244900  |
| C | -0.65338300 | 2.05298300  | -0.88415200 |
| C | -0.56031600 | 2.46576600  | -2.21963200 |
| C | -0.16824700 | 3.76541900  | -2.48868800 |
| C | 0.13770100  | 4.66306900  | -1.44970500 |
| C | 0.05357300  | 4.28179800  | -0.12112900 |
| C | -0.91244800 | 1.02176500  | 1.12525600  |
| C | -0.98937000 | 0.80826300  | -0.24002500 |
| H | -0.78890700 | 1.77597400  | -3.02369600 |
| H | -0.09176000 | 4.10090900  | -3.51581700 |
| H | 0.44557100  | 5.67254100  | -1.69384400 |
| H | 0.28953600  | 4.97076900  | 0.68105400  |
| H | -1.35992800 | -0.08858800 | -0.71545800 |
| C | -1.21666800 | 0.10950200  | 2.27891000  |
| H | -0.31813800 | 0.04714100  | 2.90279700  |
| C | -1.57191700 | -1.30842300 | 1.81119000  |
| H | -1.42290800 | -1.97996100 | 2.65782900  |
| H | -0.87988800 | -1.63334100 | 1.03055100  |
| N | -0.52778000 | 2.31773800  | 1.34519100  |
| C | -4.35869300 | -1.12017600 | -0.61002700 |
| C | -3.28446400 | -1.87208600 | -0.11369500 |
| C | -2.68122600 | -2.83172300 | -0.90285600 |
| C | -3.15164100 | -3.03369300 | -2.20567000 |
| C | -4.21927800 | -2.28256800 | -2.68656000 |
| C | -4.84257300 | -1.31471500 | -1.89553700 |
| C | -3.85291200 | -0.17012100 | 1.39799500  |
| C | -3.03295900 | -1.44568500 | 1.31506800  |
| H | -1.84873000 | -3.41502000 | -0.52321600 |
| H | -2.68332300 | -3.77551600 | -2.84027600 |
| H | -4.57472000 | -2.44451800 | -3.69737400 |
| H | -5.66896700 | -0.72791100 | -2.27820900 |
| H | -3.53569900 | -2.17648800 | 1.96250900  |
| C | -3.61696600 | 0.79884300  | 2.28122800  |
| H | -4.21883500 | 1.69961100  | 2.30725200  |
| C | -2.37625100 | 0.68642000  | 3.13249300  |
| H | -2.51641600 | 0.02927900  | 3.99887900  |

|   |             |             |             |
|---|-------------|-------------|-------------|
| N | -4.79958100 | -0.21704900 | 0.36440400  |
| H | -5.26837100 | 0.63264900  | 0.08493500  |
| H | -0.31985900 | 2.70705200  | 2.25219500  |
| H | -2.10527400 | 1.66682800  | 3.52911700  |
| I | 4.34130200  | -1.11413700 | -0.01471800 |

Table S14. Calculated Gibbs free energy and XYZ coordinates for all atoms in **COM1a-exo** catalysed by I<sub>2</sub>.

$G = -1473.2968$  Hartree

|   |            |             |             |
|---|------------|-------------|-------------|
| C | 1.88807800 | 2.92191200  | -0.72595000 |
| C | 1.69038600 | 2.83907500  | 0.67496000  |
| C | 2.00081300 | 3.95466800  | 1.47116300  |
| C | 2.49665500 | 5.09209100  | 0.86451600  |
| C | 2.68834700 | 5.14993300  | -0.53156500 |
| C | 2.38684600 | 4.07221700  | -1.34346900 |
| C | 1.14614700 | 0.85265100  | -0.24824200 |
| C | 1.21767400 | 1.51959000  | 0.95169000  |
| H | 1.85939100 | 3.91628400  | 2.54526000  |
| H | 2.74349600 | 5.95834300  | 1.46650900  |
| H | 3.07809300 | 6.05799600  | -0.97571400 |
| H | 2.53459200 | 4.11405100  | -2.41615300 |
| H | 0.96740700 | 1.10844300  | 1.91740000  |
| C | 0.76632600 | -0.51677600 | -0.55971000 |
| H | 0.73139000 | -0.77833200 | -1.61485800 |
| C | 0.50675600 | -1.46396200 | 0.35300800  |
| H | 0.57590600 | -1.26130800 | 1.41626100  |
| H | 0.28626700 | -2.48198400 | 0.05361200  |
| N | 1.54152100 | 1.70878900  | -1.25866300 |
| C | 3.31886100 | -2.69756000 | -0.65811900 |
| C | 3.37860200 | -2.63208800 | 0.75642600  |
| C | 2.93173500 | -3.73419300 | 1.50369600  |
| C | 2.43568100 | -4.83960400 | 0.83787000  |
| C | 2.38089400 | -4.87912900 | -0.56973700 |
| C | 2.82269000 | -3.81390300 | -1.33499700 |
| C | 4.10255900 | -0.66375700 | -0.08509000 |
| C | 3.88317900 | -1.33621200 | 1.09275800  |
| H | 2.96486600 | -3.71020300 | 2.58707500  |
| H | 2.08190500 | -5.69330000 | 1.40344600  |
| H | 1.98714600 | -5.76065100 | -1.06128900 |
| H | 2.77977400 | -3.84084600 | -2.41757000 |
| H | 4.06369700 | -0.94629200 | 2.08229300  |
| C | 4.56810800 | 0.69433300  | -0.34769900 |
| H | 4.84594500 | 0.91376200  | -1.37574700 |

|   |             |             |             |
|---|-------------|-------------|-------------|
| C | 4.63999400  | 1.65578600  | 0.57054300  |
| H | 4.33824800  | 1.48259600  | 1.59754600  |
| N | 3.77072400  | -1.49560000 | -1.13858200 |
| H | 1.57826300  | 1.46746700  | -2.23645100 |
| H | 3.84367700  | -1.24529600 | -2.11210700 |
| H | 4.97597800  | 2.65314300  | 0.31413500  |
| I | -5.00230200 | 0.14147800  | 0.02850900  |
| I | -2.37361700 | -0.45273500 | -0.03653300 |

Table S15. Calculated Gibbs free energy and XYZ coordinates for all atoms in **TS1a-exo** catalysed by I<sub>2</sub>.

$G = -1473.2630$  Hartree    Frequency =  $-384.81 \text{ cm}^{-1}$

|   |             |             |             |
|---|-------------|-------------|-------------|
| C | 0.25052600  | 3.86489100  | 0.21781000  |
| C | -0.49208400 | 3.63128100  | -0.96511200 |
| C | -0.69022100 | 4.69239100  | -1.86249700 |
| C | -0.15126400 | 5.93027200  | -1.56472800 |
| C | 0.58666000  | 6.13811600  | -0.38364500 |
| C | 0.79710600  | 5.11335700  | 0.52212600  |
| C | -0.39130500 | 1.70629600  | 0.21790400  |
| C | -0.89033900 | 2.25441200  | -0.94188800 |
| H | -1.25457300 | 4.53940200  | -2.77515600 |
| H | -0.29443500 | 6.75700300  | -2.24996500 |
| H | 0.99885400  | 7.11921400  | -0.18097200 |
| H | 1.36627600  | 5.27013600  | 1.43054700  |
| H | -1.46099800 | 1.73522300  | -1.69690000 |
| C | -0.50577300 | 0.35643400  | 0.75527500  |
| H | -0.41685200 | 0.27042500  | 1.83354700  |
| C | -1.28906000 | -0.60302400 | 0.08448700  |
| H | -1.31048300 | -0.57349200 | -0.99974800 |
| H | -1.38265500 | -1.59359800 | 0.51550600  |
| N | 0.28562700  | 2.68326800  | 0.91904500  |
| C | -4.33700600 | -2.18755800 | 0.24832700  |
| C | -3.88534400 | -1.21024700 | -0.65726800 |
| C | -3.96017600 | -1.46393300 | -2.02959100 |
| C | -4.49162200 | -2.67224400 | -2.45067300 |
| C | -4.93566200 | -3.63398800 | -1.52755500 |
| C | -4.86311100 | -3.40986600 | -0.16238700 |
| C | -3.61087800 | -0.44218400 | 1.47630500  |
| C | -3.33471600 | -0.12268900 | 0.12904400  |
| H | -3.61493300 | -0.72849900 | -2.74712300 |
| H | -4.56598600 | -2.88384600 | -3.51006100 |

|   |             |             |             |
|---|-------------|-------------|-------------|
| H | -5.34150900 | -4.56998100 | -1.89055300 |
| H | -5.19924500 | -4.14926300 | 0.55391000  |
| H | -3.18903600 | 0.89042800  | -0.22065900 |
| C | -3.33346200 | 0.32021500  | 2.67336400  |
| H | -3.56548700 | -0.15513000 | 3.62123800  |
| C | -2.79892600 | 1.54457900  | 2.64534100  |
| H | -2.57278400 | 2.05238300  | 1.71333600  |
| N | -4.14985300 | -1.68346600 | 1.52778400  |
| H | 0.79655500  | 2.52349700  | 1.77360400  |
| H | -4.37549100 | -2.17403600 | 2.38164900  |
| H | -2.59014600 | 2.07826000  | 3.56386300  |
| I | 4.34189300  | -1.88076800 | -0.17743500 |
| I | 1.67664400  | -0.80311500 | 0.23796900  |

Table S16. Calculated Gibbs free energy and XYZ coordinates for all atoms in **INT1a-exo** catalysed by I<sub>2</sub>.

$G = -1473.2904$  Hartree

|   |             |             |             |
|---|-------------|-------------|-------------|
| C | -0.51160300 | 3.81061900  | 0.18702900  |
| C | -1.22699000 | 3.46134600  | -0.98210000 |
| C | -1.68168700 | 4.48080200  | -1.83240200 |
| C | -1.40972800 | 5.79537400  | -1.50266800 |
| C | -0.69122500 | 6.11953200  | -0.33572500 |
| C | -0.23407100 | 5.13726600  | 0.52433400  |
| C | -0.66378700 | 1.56579000  | 0.11322300  |
| C | -1.31003600 | 2.02806400  | -1.00559400 |
| H | -2.22973200 | 4.23791000  | -2.73538100 |
| H | -1.74896100 | 6.59311900  | -2.15217800 |
| H | -0.48951900 | 7.15937500  | -0.10885600 |
| H | 0.32274300  | 5.38437000  | 1.42013800  |
| H | -1.77131100 | 1.42343900  | -1.77194900 |
| C | -0.44176100 | 0.18540200  | 0.59831400  |
| H | -0.51025200 | 0.14610300  | 1.68419100  |
| C | -1.32714900 | -0.86077800 | -0.05828000 |
| H | -1.15224000 | -0.85812800 | -1.13659100 |
| H | -1.05279500 | -1.85367900 | 0.30303300  |
| N | -0.19981500 | 2.64111200  | 0.84216400  |
| C | -4.16249300 | -2.65366400 | 0.29118900  |
| C | -3.56514100 | -1.79783000 | -0.62807600 |
| C | -3.61088900 | -2.10977600 | -1.97577700 |
| C | -4.28052000 | -3.27227400 | -2.35767600 |
| C | -4.87545700 | -4.11155700 | -1.41410500 |
| C | -4.82554400 | -3.81686900 | -0.05452300 |
| C | -3.31945600 | -0.95559800 | 1.53575900  |

|   |             |             |             |
|---|-------------|-------------|-------------|
| C | -2.87626300 | -0.68921200 | 0.12291100  |
| H | -3.14635300 | -1.46901800 | -2.71578900 |
| H | -4.33824600 | -3.53116600 | -3.40721000 |
| H | -5.38361300 | -5.00886800 | -1.74271300 |
| H | -5.27979100 | -4.46086200 | 0.68702300  |
| H | -3.17558100 | 0.31388500  | -0.19234400 |
| C | -3.13826300 | -0.13639100 | 2.71067800  |
| H | -3.33307600 | -0.60116200 | 3.67113100  |
| C | -2.83272000 | 1.16163200  | 2.61926200  |
| H | -2.67507200 | 1.65486600  | 1.66541700  |
| N | -3.96891300 | -2.09002800 | 1.57671400  |
| H | 0.41050300  | 2.56633800  | 1.64221100  |
| H | -4.34484300 | -2.49151800 | 2.43140400  |
| H | -2.75350800 | 1.77090800  | 3.51086600  |
| I | 5.01945800  | -1.39178900 | -0.19954700 |
| I | 1.65490900  | -0.39849000 | 0.25012800  |

Table S17. Calculated Gibbs free energy and XYZ coordinates for all atoms in **TS2a-exo** catalysed by I<sub>2</sub>.

$G = -1473.2537$  Hartree    Frequency =  $-487.28 \text{ cm}^{-1}$

|   |             |             |             |
|---|-------------|-------------|-------------|
| C | 0.81500100  | 3.75153600  | 0.25151300  |
| C | 0.04289500  | 3.59045200  | -0.92520200 |
| C | 0.05400100  | 4.61274200  | -1.88500300 |
| C | 0.81990800  | 5.74342400  | -1.65498300 |
| C | 1.58106000  | 5.87888500  | -0.48103600 |
| C | 1.58954900  | 4.88638400  | 0.48683800  |
| C | -0.21635700 | 1.74684500  | 0.36840500  |
| C | -0.60568400 | 2.31441400  | -0.82716700 |
| H | -0.52742900 | 4.51537700  | -2.79475900 |
| H | 0.83697700  | 6.53832300  | -2.39098900 |
| H | 2.17280200  | 6.77368800  | -0.33012900 |
| H | 2.17639600  | 4.98710000  | 1.39217400  |
| H | -1.24867100 | 1.85913100  | -1.56484100 |
| C | -0.62090600 | 0.49454100  | 0.96894400  |
| H | -0.23065900 | 0.21875400  | 1.93954900  |
| C | -1.55896100 | -0.39145200 | 0.21695600  |
| H | -1.26369500 | -0.44870300 | -0.83310200 |
| H | -1.54833400 | -1.40825800 | 0.61170700  |
| N | 0.62336300  | 2.62746800  | 1.02390400  |
| C | -4.78146700 | -1.54496800 | 0.19348800  |
| C | -3.93768900 | -0.81901800 | -0.65320400 |
| C | -3.96343100 | -1.05502500 | -2.01748200 |



|   |             |             |             |
|---|-------------|-------------|-------------|
| C | -4.84161200 | -2.01847700 | -2.51341300 |
| C | -5.67328000 | -2.73466300 | -1.65161100 |
| C | -5.65828000 | -2.51126700 | -0.27713600 |
| C | -3.64561500 | -0.12426100 | 1.55274700  |
| C | -3.09030600 | 0.08683700  | 0.18789400  |
| H | -3.31310700 | -0.50324800 | -2.68704800 |
| H | -4.87754700 | -2.21576600 | -3.57728200 |
| H | -6.34529600 | -3.48101200 | -2.05709200 |
| H | -6.30264300 | -3.06755900 | 0.39200400  |
| H | -3.09041600 | 1.13296900  | -0.13311300 |
| C | -3.07419400 | 0.45864700  | 2.67311100  |
| H | -3.24016900 | 0.03792600  | 3.65794600  |
| C | -2.12202500 | 1.43997400  | 2.44864900  |
| H | -2.21606100 | 2.11374800  | 1.60694800  |
| N | -4.56772100 | -1.10936600 | 1.50696900  |
| H | 1.10322900  | 2.42411600  | 1.88681200  |
| H | -5.02207600 | -1.49814200 | 2.32094900  |
| H | -1.52235500 | 1.81083100  | 3.27248500  |
| I | 1.62344200  | -0.91435400 | 0.37212600  |
| I | 3.95002800  | -2.35450100 | -0.31933700 |

Table S18. Calculated Gibbs free energy and XYZ coordinates for all atoms in **2a-exo** catalysed by I<sub>2</sub>.

$G = -1473.3203$  Hartree

|   |             |             |             |
|---|-------------|-------------|-------------|
| C | -1.44089600 | 3.19000300  | -0.18731800 |
| C | -1.09380500 | 2.65166800  | 1.07070300  |
| C | -1.79962200 | 3.06578500  | 2.20818900  |
| C | -2.81861700 | 3.99005500  | 2.05981300  |
| C | -3.15139300 | 4.50918400  | 0.79527800  |
| C | -2.47127500 | 4.11713200  | -0.34510400 |
| C | 0.24894400  | 1.72972800  | -0.51494300 |
| C | -0.02566200 | 1.71309100  | 0.83935600  |
| H | -1.55171600 | 2.66504400  | 3.18420000  |
| H | -3.37355600 | 4.32092400  | 2.92924500  |
| H | -3.95650600 | 5.22910200  | 0.71216100  |
| H | -2.72653700 | 4.51374900  | -1.32031800 |
| H | 0.52045900  | 1.16176900  | 1.58939100  |
| C | 1.30732000  | 1.03634300  | -1.32176700 |
| H | 0.80873500  | 0.54700800  | -2.16438800 |
| C | 2.04507700  | -0.05275600 | -0.51338900 |
| H | 1.42734900  | -0.41718300 | 0.30971700  |

|   |             |             |             |
|---|-------------|-------------|-------------|
| H | 2.24200900  | -0.90899600 | -1.16132800 |
| N | -0.60163400 | 2.61931600  | -1.12213000 |
| C | 5.49087700  | -0.65253600 | -0.07266600 |
| C | 4.28943200  | -0.58291200 | 0.64839800  |
| C | 4.09325400  | -1.39170400 | 1.75054000  |
| C | 5.10256700  | -2.28306500 | 2.13080200  |
| C | 6.28744000  | -2.34516000 | 1.40439300  |
| C | 6.50349700  | -1.52953000 | 0.29181000  |
| C | 4.21608800  | 0.87323800  | -1.20446900 |
| C | 3.40074900  | 0.45273000  | 0.00384900  |
| H | 3.16618700  | -1.34005900 | 2.31177900  |
| H | 4.96079600  | -2.92644700 | 2.98997900  |
| H | 7.06280800  | -3.04022300 | 1.70462900  |
| H | 7.42937500  | -1.58205400 | -0.26826100 |
| H | 3.23663800  | 1.30767800  | 0.67357500  |
| C | 3.66866700  | 1.61964500  | -2.16555200 |
| H | 4.19711400  | 1.88852600  | -3.07167100 |
| C | 2.27288800  | 2.12615000  | -1.90934700 |
| H | 2.30664000  | 2.95447500  | -1.19031000 |
| N | 5.46662200  | 0.26848100  | -1.11763000 |
| H | -0.64911100 | 2.77700000  | -2.11731100 |
| H | 6.11043700  | 0.23541800  | -1.89207900 |
| H | 1.83810400  | 2.53386700  | -2.82354100 |
| I | -1.81070400 | -0.62744900 | 0.09875900  |
| I | -3.54509500 | -2.64720600 | -0.37288500 |

Table S19. Calculated Gibbs free energy and XYZ coordinates for all atoms in **COM1b-endo** catalysed by I<sub>2</sub>.

$G = -1473.3012$  Hartree

|   |             |             |             |
|---|-------------|-------------|-------------|
| C | 0.25100400  | 2.60396500  | -0.54711600 |
| C | 0.09707200  | 2.14317400  | 0.78091700  |
| C | -0.34859900 | 3.03872500  | 1.76524100  |
| C | -0.61667000 | 4.34568300  | 1.40291100  |
| C | -0.45371300 | 4.78323800  | 0.07408100  |
| C | -0.02042600 | 3.92227600  | -0.91831100 |
| C | 0.85309000  | 0.43300600  | -0.51059800 |
| C | 0.46661700  | 0.75510500  | 0.78413800  |
| H | -0.47983700 | 2.70807700  | 2.78901400  |
| H | -0.95964400 | 5.04975700  | 2.15124200  |
| H | -0.67325900 | 5.81419200  | -0.17524400 |
| H | 0.10500700  | 4.25505000  | -1.94164300 |
| H | 0.55033500  | 0.10749800  | 1.64378400  |
| C | 1.38071900  | -0.80484200 | -1.07130400 |

|   |             |             |             |
|---|-------------|-------------|-------------|
| H | 1.71138900  | -0.75669500 | -2.10437100 |
| C | 1.50131400  | -1.93936000 | -0.38482400 |
| H | 1.93614500  | -2.82276900 | -0.83537600 |
| H | 1.18415700  | -2.01687500 | 0.64987200  |
| N | 0.70143000  | 1.54304400  | -1.29847300 |
| C | 4.31383600  | -1.21160200 | 0.80832200  |
| C | 4.86520900  | -1.25997900 | -0.49660900 |
| C | 5.38796400  | -2.47712900 | -0.96523300 |
| C | 5.35339000  | -3.58431300 | -0.13894400 |
| C | 4.80977100  | -3.50866000 | 1.15980900  |
| C | 4.28682200  | -2.32686200 | 1.65106200  |
| C | 4.07212200  | 0.82233500  | -0.12404800 |
| C | 4.70140300  | 0.04117800  | -1.06524600 |
| H | 5.81067800  | -2.54368100 | -1.96133800 |
| H | 5.75321900  | -4.52854500 | -0.48881400 |
| H | 4.80179400  | -4.39428200 | 1.78383500  |
| H | 3.86482200  | -2.26663200 | 2.64748700  |
| H | 4.98697900  | 0.35797200  | -2.05635200 |
| C | 3.63349700  | 2.21423400  | -0.16801100 |
| H | 2.90841900  | 2.50739500  | 0.58910300  |
| C | 4.04452200  | 3.11021500  | -1.06375200 |
| H | 4.77775300  | 2.86097300  | -1.82329400 |
| N | 3.84463700  | 0.06054000  | 1.00423300  |
| H | 3.37527600  | 0.39420100  | 1.83166800  |
| H | 0.92215600  | 1.57650100  | -2.28224100 |
| H | 3.65578800  | 4.12077000  | -1.05499800 |
| I | -4.71853100 | -1.31233000 | -0.22493500 |
| I | -2.21594600 | -0.35277000 | 0.16573600  |

Table S20. Calculated Gibbs free energy and XYZ coordinates for all atoms in **TS1b-endo** catalysed by I<sub>2</sub>.

$G = -1473.2623$  Hartree      Frequency =  $-429.33$  cm<sup>-1</sup>

|   |             |            |             |
|---|-------------|------------|-------------|
| C | -0.86486800 | 3.46828800 | -0.57677600 |
| C | -0.70629300 | 2.66512400 | 0.55933200  |
| C | -1.25984100 | 3.06451700 | 1.76663400  |
| C | -1.95482300 | 4.27197300 | 1.81466000  |
| C | -2.10921900 | 5.05435000 | 0.66935700  |
| C | -1.56775700 | 4.66189500 | -0.55319800 |
| C | 0.44760500  | 1.73064000 | -1.24215100 |
| C | 0.01700300  | 1.43993500 | 0.14546900  |
| H | -1.16360200 | 2.44432500 | 2.65022100  |
| H | -2.38903400 | 4.60315100 | 2.74957200  |
| H | -2.66177700 | 5.98393600 | 0.72825100  |

|   |             |             |             |
|---|-------------|-------------|-------------|
| H | -1.68906700 | 5.26360600  | -1.44497200 |
| H | 0.77183400  | 1.03325900  | 0.80834000  |
| C | 1.33907400  | 1.01526400  | -2.02843600 |
| H | 1.54542200  | 1.37565800  | -3.02968300 |
| C | 1.97823800  | -0.14372200 | -1.55842100 |
| H | 2.38217400  | -0.81922400 | -2.30340000 |
| H | 1.56102700  | -0.65445000 | -0.69482300 |
| N | -0.20002900 | 2.85177900  | -1.64198200 |
| C | 3.94617300  | -1.23589200 | 1.02721400  |
| C | 4.19425300  | -1.16525800 | -0.35315700 |
| C | 4.63261300  | -2.30431300 | -1.02960200 |
| C | 4.82321400  | -3.47038800 | -0.30413000 |
| C | 4.56749900  | -3.51807300 | 1.07521500  |
| C | 4.12053100  | -2.40257700 | 1.76571500  |
| C | 3.51114100  | 0.88823600  | 0.40075700  |
| C | 3.81061800  | 0.17090300  | -0.79226400 |
| H | 4.82508600  | -2.27600500 | -2.09567700 |
| H | 5.17166100  | -4.36320100 | -0.80790900 |
| H | 4.71931000  | -4.44654500 | 1.61119600  |
| H | 3.91583900  | -2.43736400 | 2.82835800  |
| H | 4.22861000  | 0.65733000  | -1.66143300 |
| C | 3.14946500  | 2.27275800  | 0.54822700  |
| H | 2.86796700  | 2.61165900  | 1.54053300  |
| C | 3.09469000  | 3.11348400  | -0.49277100 |
| H | 3.39231100  | 2.81057400  | -1.48900300 |
| N | 3.52828000  | 0.02500200  | 1.44101700  |
| H | 3.27927500  | 0.26787300  | 2.39029800  |
| H | -0.11733000 | 3.24712300  | -2.56738500 |
| H | 2.76876600  | 4.13763600  | -0.35973700 |
| I | -3.56216800 | -2.68663100 | -0.06394500 |
| I | -1.48919300 | -0.27638100 | 0.01684900  |

Table S21. Calculated Gibbs free energy and XYZ coordinates for all atoms in **INT1b-endo** catalysed by I<sub>2</sub>.

$G = -1473.2728$  Hartree

|   |             |            |             |
|---|-------------|------------|-------------|
| C | 0.90056500  | 3.62306500 | 0.68538700  |
| C | 0.85558900  | 2.82319500 | -0.46414600 |
| C | 1.47853100  | 3.23866900 | -1.62797500 |
| C | 2.13493100  | 4.47048700 | -1.63659000 |
| C | 2.17481600  | 5.25475400 | -0.48509300 |
| C | 1.56081400  | 4.84331900 | 0.69778100  |
| C | -0.44529700 | 1.85654100 | 1.24109600  |
| C | 0.12425500  | 1.56635400 | -0.12421100 |

|   |             |             |             |
|---|-------------|-------------|-------------|
| H | 1.46570000  | 2.61157900  | -2.51244500 |
| H | 2.62399700  | 4.81428100  | -2.53908400 |
| H | 2.69573100  | 6.20457500  | -0.50422900 |
| H | 1.59865400  | 5.45232200  | 1.59248600  |
| H | -0.61509500 | 1.24187200  | -0.85125800 |
| C | -1.42880100 | 1.19720000  | 1.88063600  |
| H | -1.75152900 | 1.55547000  | 2.85358900  |
| C | -2.07354100 | -0.03130900 | 1.34858000  |
| H | -2.19247400 | -0.76651300 | 2.14711100  |
| H | -1.47318400 | -0.51003600 | 0.57202800  |
| N | 0.20960900  | 2.98498300  | 1.71088600  |
| C | -4.19587400 | -1.31128400 | -0.94486200 |
| C | -4.11738200 | -1.19511900 | 0.43955900  |
| C | -4.45442500 | -2.27917700 | 1.23258500  |
| C | -4.87895600 | -3.44821600 | 0.60276600  |
| C | -4.94921200 | -3.53799400 | -0.78898300 |
| C | -4.60301900 | -2.46085800 | -1.59877500 |
| C | -3.50839500 | 0.81646700  | -0.56900600 |
| C | -3.54909800 | 0.15477200  | 0.77493300  |
| H | -4.39548400 | -2.22217400 | 2.31283300  |
| H | -5.15540300 | -4.30566900 | 1.20295900  |
| H | -5.27488600 | -4.46228000 | -1.24851800 |
| H | -4.64724600 | -2.52091800 | -2.67829400 |
| H | -4.13274700 | 0.72333100  | 1.50073600  |
| C | -3.16253500 | 2.17439200  | -0.88659000 |
| H | -2.98067700 | 2.41219500  | -1.92941200 |
| C | -3.07507900 | 3.11840600  | 0.05936400  |
| H | -3.30023700 | 2.91360300  | 1.09753200  |
| N | -3.80573100 | -0.06893900 | -1.49438900 |
| H | -3.79085600 | 0.12890000  | -2.49013400 |
| H | -0.02082700 | 3.42565500  | 2.58741600  |
| H | -2.79593100 | 4.13267000  | -0.19943900 |
| I | 3.58574300  | -2.99390000 | -0.00375000 |
| I | 1.51969100  | -0.14729100 | -0.02357200 |

Table S22. Calculated Gibbs free energy and XYZ coordinates for all atoms in **TS2b-endo** catalysed by I<sub>2</sub>.

$G = -1473.2670$  Hartree    Frequency =  $-245.93 \text{ cm}^{-1}$

|   |             |            |             |
|---|-------------|------------|-------------|
| C | -1.92727300 | 3.27065800 | -0.63150400 |
| C | -1.68729800 | 2.54445300 | 0.54065800  |
| C | -2.47572200 | 2.75586500 | 1.65948400  |
| C | -3.49156400 | 3.70959500 | 1.59155000  |

|   |             |             |             |
|---|-------------|-------------|-------------|
| C | -3.71997600 | 4.42080100  | 0.41429200  |
| C | -2.94132400 | 4.21079000  | -0.72325700 |
| C | -0.08443600 | 1.99950700  | -1.08059200 |
| C | -0.58156600 | 1.58336200  | 0.26702900  |
| H | -2.31199700 | 2.18324600  | 2.56511000  |
| H | -4.11429900 | 3.89324700  | 2.45784200  |
| H | -4.51909400 | 5.15112400  | 0.37812100  |
| H | -3.12024400 | 4.76250800  | -1.63777000 |
| H | 0.19934400  | 1.49694100  | 1.01959400  |
| C | 1.09663300  | 1.64741400  | -1.68291200 |
| H | 1.28085500  | 2.03629000  | -2.68008100 |
| C | 1.95535800  | 0.52111100  | -1.22406400 |
| H | 2.06804400  | -0.20302100 | -2.03393000 |
| H | 1.51436800  | -0.01507400 | -0.38232300 |
| N | -0.99562400 | 2.87650000  | -1.59658000 |
| C | 4.46154900  | -0.28734500 | 0.93215200  |
| C | 4.24614300  | -0.29907400 | -0.44609300 |
| C | 4.71186200  | -1.36003500 | -1.20405500 |
| C | 5.39295100  | -2.39013900 | -0.55637900 |
| C | 5.59601100  | -2.35823700 | 0.82377100  |
| C | 5.13052000  | -1.29973200 | 1.59957500  |
| C | 3.36325200  | 1.64918900  | 0.49080900  |
| C | 3.44243900  | 0.91513500  | -0.81041500 |
| H | 4.54924000  | -1.39250900 | -2.27495600 |
| H | 5.76500000  | -3.22923600 | -1.13022600 |
| H | 6.12278900  | -3.17307700 | 1.30428200  |
| H | 5.28139900  | -1.27240500 | 2.67115700  |
| H | 3.87747900  | 1.50825500  | -1.61725800 |
| C | 2.62470300  | 2.82524000  | 0.66002300  |
| H | 2.29792400  | 3.12247500  | 1.64922800  |
| C | 2.15825800  | 3.45300700  | -0.46686900 |
| H | 2.68382400  | 3.38087700  | -1.40840100 |
| N | 3.89848000  | 0.89298600  | 1.45212300  |
| H | 3.87578400  | 1.12758900  | 2.43615400  |
| H | -0.92587900 | 3.27829900  | -2.51926800 |
| H | 1.44228600  | 4.26364800  | -0.38773800 |
| I | -2.55096900 | -3.63376700 | -0.07600600 |
| I | -1.40959600 | -0.48651600 | 0.10775000  |

Table S23. Calculated Gibbs free energy and XYZ coordinates for all atoms in **2b-endo** catalysed by I<sub>2</sub>.

$G = -1473.3202$  Hartree

|   |             |            |             |
|---|-------------|------------|-------------|
| C | -1.53252000 | 3.19074100 | -0.30258400 |
|---|-------------|------------|-------------|

|   |             |             |             |
|---|-------------|-------------|-------------|
| C | -1.04527600 | 2.70911100  | 0.93201700  |
| C | -1.68801700 | 3.09485500  | 2.11615700  |
| C | -2.78376000 | 3.93578900  | 2.03587400  |
| C | -3.25635400 | 4.39843100  | 0.79386700  |
| C | -2.64172500 | 4.03267400  | -0.39145400 |
| C | 0.23450900  | 1.85460100  | -0.74103700 |
| C | 0.06906500  | 1.84759300  | 0.63126400  |
| H | -1.33233200 | 2.73649100  | 3.07518800  |
| H | -3.29123500 | 4.24385400  | 2.94194300  |
| H | -4.11886600 | 5.05315200  | 0.76475000  |
| H | -3.00465700 | 4.38656200  | -1.34899800 |
| H | 0.71705000  | 1.36219100  | 1.34425300  |
| C | 1.29156300  | 1.25599200  | -1.62222900 |
| H | 0.80822800  | 0.98616700  | -2.56677500 |
| C | 1.92321100  | -0.01755300 | -1.00590500 |
| H | 1.51907000  | -0.90928000 | -1.48896700 |
| H | 1.67098600  | -0.09410400 | 0.05322500  |
| N | -0.72976600 | 2.66225500  | -1.29181400 |
| C | 5.02039200  | -0.37376500 | 0.63878100  |
| C | 4.16814900  | -1.03962200 | -0.25546300 |
| C | 4.09122900  | -2.41877700 | -0.24398100 |
| C | 4.86793600  | -3.13781100 | 0.67117800  |
| C | 5.70716500  | -2.46494900 | 1.55353600  |
| C | 5.79984100  | -1.07188800 | 1.55138000  |
| C | 3.96530800  | 1.29515500  | -0.51651200 |
| C | 3.46023200  | -0.00933600 | -1.10189300 |
| H | 3.43350400  | -2.93812700 | -0.93275200 |
| H | 4.81469700  | -4.21895400 | 0.69390000  |
| H | 6.30370000  | -3.03003000 | 2.26013000  |
| H | 6.45673100  | -0.55475200 | 2.24034100  |
| H | 3.75746300  | -0.09118500 | -2.15526000 |
| C | 3.41428000  | 2.45381500  | -0.88600800 |
| H | 3.69673000  | 3.40735000  | -0.45854800 |
| C | 2.35883000  | 2.35133100  | -1.95485200 |
| H | 2.81495400  | 2.07688000  | -2.91398700 |
| N | 4.94326800  | 1.00038800  | 0.42766800  |
| H | 5.29348200  | 1.67955900  | 1.08431000  |
| H | -0.86964300 | 2.78730900  | -2.28300400 |
| H | 1.85714000  | 3.30736300  | -2.11014800 |
| I | -3.29308400 | -2.72720300 | -0.16287400 |
| I | -1.62325300 | -0.61519900 | 0.09564000  |

Table S24. Calculated Gibbs free energy and XYZ coordinates for all atoms in **COM1b-exo** catalysed by I<sub>2</sub>.

$G = -1473.2988$  Hartree

|   |             |             |             |
|---|-------------|-------------|-------------|
| C | -0.07195600 | 2.99278100  | -0.32399300 |
| C | 0.18798800  | 2.16264600  | 0.79136600  |
| C | -0.01551200 | 2.67255200  | 2.08311000  |
| C | -0.46233300 | 3.97312000  | 2.22166600  |
| C | -0.71720500 | 4.78116100  | 1.09620700  |
| C | -0.52843100 | 4.30553700  | -0.18873600 |
| C | 0.64758100  | 1.00735100  | -1.10737700 |
| C | 0.61901500  | 0.89471900  | 0.27468500  |
| H | 0.17387700  | 2.05371200  | 2.95243100  |
| H | -0.62263700 | 4.38259900  | 3.21156100  |
| H | -1.06910700 | 5.79530700  | 1.24078300  |
| H | -0.72617000 | 4.92349800  | -1.05612700 |
| H | 0.97382100  | 0.04567500  | 0.83866600  |
| C | 1.06132200  | 0.05209600  | -2.12788300 |
| H | 0.81808800  | 0.31162300  | -3.15440700 |
| C | 1.70662800  | -1.08151900 | -1.85744900 |
| H | 1.98249900  | -1.35387500 | -0.84305200 |
| H | 1.98441900  | -1.76655400 | -2.64870500 |
| N | 0.20910600  | 2.26028500  | -1.45447000 |
| C | 4.71165000  | -1.61968600 | -0.20482700 |
| C | 4.12763600  | -1.10763000 | 0.98155500  |
| C | 3.91661000  | -1.97944600 | 2.06390400  |
| C | 4.27778500  | -3.30678900 | 1.93507400  |
| C | 4.85359400  | -3.79374100 | 0.74413200  |
| C | 5.07851500  | -2.96210200 | -0.33749100 |
| C | 4.27464000  | 0.56502600  | -0.52991500 |
| C | 3.86957900  | 0.28049000  | 0.75178100  |
| H | 3.47431700  | -1.61270000 | 2.98321400  |
| H | 4.11725400  | -3.98959800 | 2.76067500  |
| H | 5.12421700  | -4.84046500 | 0.67532400  |
| H | 5.52133100  | -3.33387400 | -1.25385700 |
| H | 3.44103200  | 0.98801300  | 1.44472200  |
| C | 4.20447300  | 1.80283000  | -1.29845100 |
| H | 4.82618000  | 1.84962900  | -2.18905500 |
| C | 3.43184100  | 2.83957000  | -0.97606500 |
| H | 2.77867200  | 2.81512300  | -0.10876400 |
| N | 4.80436000  | -0.58029500 | -1.09392700 |
| H | 0.12610700  | 2.59438800  | -2.40250100 |
| H | 5.12491000  | -0.65479100 | -2.04650300 |
| H | 3.43087400  | 3.74164400  | -1.57522100 |
| I | -4.50807300 | -1.50189700 | -0.07343900 |
| I | -2.05069100 | -0.35816100 | -0.01973400 |



Table S25. Calculated Gibbs free energy and XYZ coordinates for all atoms in **TS1b-exo** catalysed by I<sub>2</sub>.

|   | $G = -1473.2609$ Hartree | Frequency = $-439.53$ cm <sup>-1</sup> |             |
|---|--------------------------|----------------------------------------|-------------|
| C | -1.19558000              | 3.49181800                             | -0.35155800 |
| C | -1.19682300              | 2.65809900                             | 0.77299700  |
| C | -1.99492600              | 2.97528400                             | 1.86217500  |
| C | -2.77298100              | 4.13022000                             | 1.80473200  |
| C | -2.76509100              | 4.94337500                             | 0.67028200  |
| C | -1.97361600              | 4.63531300                             | -0.43437500 |
| C | 0.31828000               | 1.84851300                             | -0.81189200 |
| C | -0.31624100              | 1.50398500                             | 0.47920100  |
| H | -2.01893300              | 2.33240400                             | 2.73429300  |
| H | -3.39841600              | 4.39643300                             | 2.64751000  |
| H | -3.38509800              | 5.83099400                             | 0.64489600  |
| H | -1.96417100              | 5.26384700                             | -1.31599600 |
| H | 0.33435500               | 1.13255800                             | 1.26377900  |
| C | 1.36040200               | 1.20221100                             | -1.46445700 |
| H | 1.73083100               | 1.63458200                             | -2.38539700 |
| C | 1.95023200               | 0.03676100                             | -0.94663400 |
| H | 1.36385400               | -0.56262600                            | -0.25732900 |
| H | 2.56833000               | -0.55544100                            | -1.61338900 |
| N | -0.29410300              | 2.96239600                             | -1.28086800 |
| C | 5.00011900               | -1.18599700                            | -0.00052700 |
| C | 3.82733500               | -0.98604000                            | 0.74617900  |
| C | 3.30266500               | -2.04027000                            | 1.49472900  |
| C | 3.97550000               | -3.25283300                            | 1.48830400  |
| C | 5.14801300               | -3.42929000                            | 0.73722700  |
| C | 5.67963700               | -2.40010100                            | -0.02454500 |
| C | 4.37605900               | 0.95532900                             | -0.33965300 |
| C | 3.35547500               | 0.36009300                             | 0.45081600  |
| H | 2.39236200               | -1.91329200                            | 2.06917500  |
| H | 3.58967500               | -4.08138400                            | 2.06874300  |
| H | 5.64642600               | -4.39050200                            | 0.75030200  |
| H | 6.58087300               | -2.53429900                            | -0.60964700 |
| H | 2.74199400               | 0.93987700                             | 1.12558100  |
| C | 4.43506100               | 2.29488900                             | -0.86364900 |
| H | 5.23291100               | 2.52006400                             | -1.56377100 |
| C | 3.52525700               | 3.22544400                             | -0.55145200 |
| H | 2.73920900               | 3.04167200                             | 0.17098300  |
| N | 5.29153800               | 0.01137400                             | -0.64709100 |
| H | -0.09379000              | 3.37426600                             | -2.18075400 |
| H | 6.07690800               | 0.15681500                             | -1.26628800 |
| H | 3.56775400               | 4.21265100                             | -0.99400100 |
| I | -3.48503000              | -2.83401200                            | -0.38387000 |

I                    -1.66440000    -0.32477700    0.08008900

Table S26. Calculated Gibbs free energy and XYZ coordinates for all atoms in **INT1b-exo** catalysed by I<sub>2</sub>.

$G = -1473.2712$  Hartree

|   |             |             |             |
|---|-------------|-------------|-------------|
| C | 4.26590500  | 0.28912700  | 0.52519400  |
| C | 3.44475600  | -0.25037000 | -0.47018800 |
| C | 3.96485400  | -1.11962100 | -1.41206900 |
| C | 5.32121800  | -1.44409300 | -1.35140200 |
| C | 6.12811100  | -0.90472400 | -0.35138800 |
| C | 5.61533000  | -0.02837700 | 0.60427000  |
| C | 2.17975500  | 1.17380300  | 0.94764000  |
| C | 2.05804700  | 0.28073300  | -0.27534800 |
| H | 3.32403000  | -1.55332900 | -2.17181500 |
| H | 5.74552200  | -2.12530800 | -2.07776100 |
| H | 7.17731700  | -1.17197300 | -0.31012600 |
| H | 6.24597800  | 0.38792200  | 1.38020400  |
| H | 1.69867000  | 0.82786400  | -1.14694900 |
| C | 1.24896500  | 1.93280500  | 1.55708400  |
| H | 1.58785100  | 2.55893300  | 2.37545700  |
| C | -0.22680800 | 1.89526100  | 1.30800300  |
| H | -0.61143800 | 0.88371100  | 1.45310200  |
| H | -0.73704200 | 2.52639900  | 2.03869200  |
| N | 3.51752900  | 1.14069800  | 1.32674600  |
| C | -2.93853400 | 3.17475700  | -0.30174400 |
| C | -2.22290400 | 1.98376000  | -0.22915500 |
| C | -2.90421300 | 0.77809700  | -0.19451000 |
| C | -4.29732200 | 0.81472300  | -0.25480500 |
| C | -4.99271900 | 2.02323500  | -0.33293300 |
| C | -4.31967200 | 3.24199300  | -0.35521800 |
| C | -0.75783300 | 3.80038700  | -0.27653600 |
| C | -0.75741200 | 2.30891200  | -0.11820500 |
| H | -2.38685000 | -0.17397200 | -0.12658500 |
| H | -4.84531700 | -0.11935900 | -0.23819600 |
| H | -6.07443200 | 2.01572900  | -0.37476500 |
| H | -4.84755300 | 4.18545600  | -0.41073600 |
| H | -0.15658700 | 1.82318900  | -0.89024500 |
| C | 0.36652700  | 4.69782300  | -0.33235400 |
| H | 0.16171000  | 5.75409700  | -0.19771000 |
| C | 1.60700900  | 4.26345800  | -0.57727300 |
| H | 1.82422700  | 3.21981300  | -0.76017900 |
| N | -1.99557500 | 4.23128000  | -0.31516900 |
| H | 3.84070700  | 1.50521600  | 2.20896000  |

|   |             |             |             |
|---|-------------|-------------|-------------|
| H | -2.24505200 | 5.21376400  | -0.37749100 |
| H | 2.43574300  | 4.95879800  | -0.62360500 |
| I | -2.42736600 | -3.26464400 | 0.15716400  |
| I | 0.55020500  | -1.29744900 | -0.07198800 |

Table S27. Calculated Gibbs free energy and XYZ coordinates for all atoms in **TS2b-exo** catalysed by I<sub>2</sub>.

|   | $G = -1473.2632$ Hartree | Frequency = $-283.41$ cm <sup>-1</sup> |             |
|---|--------------------------|----------------------------------------|-------------|
| C | -1.60945300              | 3.48048600                             | -0.41902800 |
| C | -1.52853800              | 2.64892600                             | 0.70346600  |
| C | -2.38151600              | 2.85046500                             | 1.77612000  |
| C | -3.30193300              | 3.89661900                             | 1.71054300  |
| C | -3.37382800              | 4.71097500                             | 0.58084500  |
| C | -2.52735300              | 4.51463300                             | -0.50955600 |
| C | 0.12574600               | 2.05558800                             | -0.85302900 |
| C | -0.49615200              | 1.61240300                             | 0.43003700  |
| H | -2.34098700              | 2.20033600                             | 2.64248400  |
| H | -3.97343500              | 4.07285300                             | 2.54124400  |
| H | -4.10172100              | 5.51229500                             | 0.54565700  |
| H | -2.58254000              | 5.14613400                             | -1.38752700 |
| H | 0.20375700               | 1.38503600                             | 1.23047800  |
| C | 1.29997000               | 1.61978200                             | -1.42004300 |
| H | 1.56287900               | 2.03498000                             | -2.38555300 |
| C | 1.98930800               | 0.36937900                             | -0.98242700 |
| H | 1.26655800               | -0.39303700                            | -0.68735600 |
| H | 2.57044300               | -0.04486300                            | -1.80763700 |
| N | -0.63758500              | 3.07622700                             | -1.33837200 |
| C | 5.01336900               | -0.70144200                            | 0.14383400  |
| C | 3.67273100               | -0.83116300                            | 0.50949100  |
| C | 3.19352200               | -2.05464900                            | 0.94679200  |
| C | 4.08228500               | -3.12699600                            | 1.01675300  |
| C | 5.42002100               | -2.97495400                            | 0.64880000  |
| C | 5.91409600               | -1.75231100                            | 0.20114500  |
| C | 4.12092000               | 1.36496400                             | -0.14024000 |
| C | 2.98884800               | 0.47915200                             | 0.26014600  |
| H | 2.15299900               | -2.17762600                            | 1.22481000  |
| H | 3.72925800               | -4.09198600                            | 1.35724000  |
| H | 6.08938500               | -3.82395100                            | 0.70975100  |
| H | 6.95036200               | -1.63038600                            | -0.08696900 |
| H | 2.43120200               | 0.85628000                             | 1.12017100  |
| C | 3.92974100               | 2.68980600                             | -0.54882600 |
| H | 4.65917600               | 3.17245500                             | -1.18798000 |
| C | 2.70358900               | 3.25366800                             | -0.30637100 |

|   |             |             |             |
|---|-------------|-------------|-------------|
| H | 2.10805700  | 2.94318800  | 0.53978100  |
| N | 5.23040300  | 0.62982000  | -0.25724300 |
| H | -0.47034900 | 3.52409600  | -2.22708900 |
| H | 6.11377200  | 0.98292700  | -0.60159400 |
| H | 2.43427200  | 4.20528300  | -0.74957000 |
| I | -2.93781200 | -3.30018000 | -0.31934100 |
| I | -1.52190600 | -0.36865600 | 0.09081700  |

Table S28. Calculated Gibbs free energy and XYZ coordinates for all atoms in **2b-exo** catalysed by I<sub>2</sub>.

$G = -1473.3241$  Hartree

|   |             |             |             |
|---|-------------|-------------|-------------|
| C | 3.28005300  | 0.49789600  | 0.71676400  |
| C | 3.30844300  | 0.74709000  | -0.67738300 |
| C | 4.00776400  | -0.13851800 | -1.50915900 |
| C | 4.63408500  | -1.23797300 | -0.94732000 |
| C | 4.58043000  | -1.47620600 | 0.43812400  |
| C | 3.90584800  | -0.61391400 | 1.29012500  |
| C | 2.02968500  | 2.32977800  | 0.30905400  |
| C | 2.50435600  | 1.91431400  | -0.90575600 |
| H | 4.04214800  | 0.02868300  | -2.57958000 |
| H | 5.17005500  | -1.93326600 | -1.58189200 |
| H | 5.07448300  | -2.34851100 | 0.84862000  |
| H | 3.86429400  | -0.79429900 | 2.35817400  |
| H | 2.27409800  | 2.36460300  | -1.85834400 |
| C | 1.09236100  | 3.44754900  | 0.67398600  |
| H | 1.60415100  | 4.09307700  | 1.39586100  |
| C | -0.17825600 | 2.87605800  | 1.34651400  |
| H | 0.07266000  | 2.34123900  | 2.26627900  |
| H | -0.84609500 | 3.70027400  | 1.61309200  |
| N | 2.50482800  | 1.47714900  | 1.28855800  |
| C | -2.98623400 | 1.43539200  | -0.52056100 |
| C | -2.22083100 | 1.36371200  | 0.65308600  |
| C | -2.71999500 | 0.73265200  | 1.77479800  |
| C | -4.00212100 | 0.17302100  | 1.72589800  |
| C | -4.74904000 | 0.24301500  | 0.55461100  |
| C | -4.25240000 | 0.87392500  | -0.58981500 |
| C | -1.12020400 | 2.67490600  | -0.95221300 |
| C | -0.86485500 | 1.95140700  | 0.35264100  |
| H | -2.12606900 | 0.66793800  | 2.68051200  |
| H | -4.41219300 | -0.31846100 | 2.59938500  |
| H | -5.74022200 | -0.19463500 | 0.52562800  |
| H | -4.84059000 | 0.92424600  | -1.49841500 |

|   |             |             |             |
|---|-------------|-------------|-------------|
| H | -0.18838300 | 1.11114800  | 0.13919600  |
| C | -0.40905500 | 3.71848500  | -1.37803700 |
| H | -0.67462600 | 4.22505700  | -2.30060900 |
| C | 0.71640200  | 4.29862800  | -0.55201800 |
| H | 1.60776700  | 4.45754400  | -1.16638100 |
| N | -2.26048400 | 2.08697500  | -1.52588800 |
| H | 2.31602000  | 1.56619900  | 2.27461300  |
| H | -2.74453600 | 2.55438500  | -2.27857500 |
| H | 0.41705200  | 5.29313600  | -0.20208700 |
| I | -1.69324000 | -2.20465000 | -0.48853000 |
| I | 0.82684300  | -1.71147400 | 0.25467800  |

Table S29. Calculated Gibbs free energy and XYZ coordinates for all atoms in **COM1a-endo** catalysed by IBr.

$G = -1594.6947$  Hartree

|   |             |             |             |
|---|-------------|-------------|-------------|
| I | -2.66097200 | -0.28645000 | -0.01556800 |
| C | 1.52753800  | 2.91733100  | -0.55440200 |
| C | 1.58986600  | 2.72985400  | 0.84871200  |
| C | 2.10151700  | 3.76576500  | 1.65068000  |
| C | 2.52431500  | 4.93157200  | 1.04510800  |
| C | 2.44708700  | 5.09715700  | -0.35453400 |
| C | 1.94979600  | 4.09984700  | -1.17042500 |
| C | 0.77443200  | 0.85112800  | -0.09788900 |
| C | 1.10450100  | 1.41389700  | 1.11434600  |
| H | 2.16149400  | 3.64646700  | 2.72635900  |
| H | 2.92068800  | 5.73843300  | 1.64950600  |
| H | 2.78524600  | 6.02659100  | -0.79661500 |
| H | 1.89332500  | 4.22280200  | -2.24536200 |
| H | 1.02515200  | 0.93210800  | 2.07676100  |
| C | 0.27364500  | -0.47069400 | -0.42574300 |
| H | 0.25465000  | -0.73129200 | -1.48088600 |
| C | -0.11472300 | -1.39516900 | 0.47741500  |
| H | -0.37127000 | -2.40015600 | 0.16411700  |
| H | -0.06940600 | -1.19994500 | 1.54340500  |
| N | 1.02800100  | 1.76547200  | -1.09959200 |
| C | 2.64886200  | -2.75505900 | 0.70260300  |
| C | 2.66070800  | -2.87279700 | -0.70961200 |
| C | 2.11693100  | -4.02773700 | -1.29565100 |
| C | 1.59012900  | -5.01038000 | -0.47794900 |
| C | 1.60015200  | -4.87515100 | 0.92503500  |
| C | 2.13028500  | -3.75171400 | 1.53340800  |
| C | 3.52673700  | -0.86233900 | -0.14638100 |

|    |             |             |             |
|----|-------------|-------------|-------------|
| C  | 3.22736400  | -1.66421900 | -1.22361600 |
| H  | 2.10687000  | -4.14205300 | -2.37367400 |
| H  | 1.16483300  | -5.90420800 | -0.91830800 |
| H  | 1.18437400  | -5.66616100 | 1.53742500  |
| H  | 2.13354300  | -3.64177500 | 2.61155900  |
| H  | 3.39468000  | -1.41688700 | -2.26047900 |
| C  | 4.08155000  | 0.48523500  | -0.06745100 |
| H  | 4.26117000  | 0.86622100  | 0.93439800  |
| C  | 4.34404200  | 1.26155400  | -1.11662900 |
| H  | 4.16202800  | 0.92760400  | -2.13267600 |
| N  | 3.18305100  | -1.52976700 | 1.01133800  |
| H  | 3.27680200  | -1.14799100 | 1.93962900  |
| H  | 0.87625200  | 1.60044000  | -2.08239500 |
| H  | 4.73629600  | 2.26186600  | -0.98353100 |
| Br | -5.11345600 | 0.41003900  | -0.06881400 |

Table S30. Calculated Gibbs free energy and XYZ coordinates for all atoms in **TS1a-endo** catalysed by IBr.

$G = -1594.6638$  Hartree      Frequency =  $-387.04 \text{ cm}^{-1}$

|   |             |             |             |
|---|-------------|-------------|-------------|
| I | -2.66097200 | -0.28645000 | -0.01556800 |
| C | 1.52753800  | 2.91733100  | -0.55440200 |
| C | 1.58986600  | 2.72985400  | 0.84871200  |
| C | 2.10151700  | 3.76576500  | 1.65068000  |
| C | 2.52431500  | 4.93157200  | 1.04510800  |
| C | 2.44708700  | 5.09715700  | -0.35453400 |
| C | 1.94979600  | 4.09984700  | -1.17042500 |
| C | 0.77443200  | 0.85112800  | -0.09788900 |
| C | 1.10450100  | 1.41389700  | 1.11434600  |
| H | 2.16149400  | 3.64646700  | 2.72635900  |
| H | 2.92068800  | 5.73843300  | 1.64950600  |
| H | 2.78524600  | 6.02659100  | -0.79661500 |
| H | 1.89332500  | 4.22280200  | -2.24536200 |
| H | 1.02515200  | 0.93210800  | 2.07676100  |
| C | 0.27364500  | -0.47069400 | -0.42574300 |
| H | 0.25465000  | -0.73129200 | -1.48088600 |
| C | -0.11472300 | -1.39516900 | 0.47741500  |
| H | -0.37127000 | -2.40015600 | 0.16411700  |
| H | -0.06940600 | -1.19994500 | 1.54340500  |
| N | 1.02800100  | 1.76547200  | -1.09959200 |
| C | 2.64886200  | -2.75505900 | 0.70260300  |
| C | 2.66070800  | -2.87279700 | -0.70961200 |

|    |             |             |             |
|----|-------------|-------------|-------------|
| C  | 2.11693100  | -4.02773700 | -1.29565100 |
| C  | 1.59012900  | -5.01038000 | -0.47794900 |
| C  | 1.60015200  | -4.87515100 | 0.92503500  |
| C  | 2.13028500  | -3.75171400 | 1.53340800  |
| C  | 3.52673700  | -0.86233900 | -0.14638100 |
| C  | 3.22736400  | -1.66421900 | -1.22361600 |
| H  | 2.10687000  | -4.14205300 | -2.37367400 |
| H  | 1.16483300  | -5.90420800 | -0.91830800 |
| H  | 1.18437400  | -5.66616100 | 1.53742500  |
| H  | 2.13354300  | -3.64177500 | 2.61155900  |
| H  | 3.39468000  | -1.41688700 | -2.26047900 |
| C  | 4.08155000  | 0.48523500  | -0.06745100 |
| H  | 4.26117000  | 0.86622100  | 0.93439800  |
| C  | 4.34404200  | 1.26155400  | -1.11662900 |
| H  | 4.16202800  | 0.92760400  | -2.13267600 |
| N  | 3.18305100  | -1.52976700 | 1.01133800  |
| H  | 3.27680200  | -1.14799100 | 1.93962900  |
| H  | 0.87625200  | 1.60044000  | -2.08239500 |
| H  | 4.73629600  | 2.26186600  | -0.98353100 |
| Br | -5.11345600 | 0.41003900  | -0.06881400 |

Table S31. Calculated Gibbs free energy and XYZ coordinates for all atoms in **INT1a-endo** catalysed by IBr.

$G = -1594.6903$  Hartree

|   |             |             |             |
|---|-------------|-------------|-------------|
| I | 2.34240700  | -0.27785700 | 0.26044700  |
| C | -0.91539200 | 3.36210100  | 0.17948200  |
| C | -1.45637200 | 2.74763900  | -0.97375100 |
| C | -2.21591500 | 3.52317700  | -1.86287300 |
| C | -2.41122900 | 4.86323100  | -1.58119600 |
| C | -1.85954800 | 5.45329000  | -0.42852700 |
| C | -1.10385000 | 4.71499200  | 0.46577900  |
| C | -0.32541500 | 1.19120400  | 0.21247500  |
| C | -1.06407200 | 1.36683400  | -0.93239600 |
| H | -2.63381300 | 3.07928200  | -2.75906000 |
| H | -2.99214700 | 5.47519200  | -2.26046700 |
| H | -2.02617600 | 6.50682900  | -0.24000300 |
| H | -0.67156500 | 5.16787400  | 1.35002500  |
| H | -1.29176400 | 0.61135400  | -1.66867100 |
| C | 0.22546000  | -0.04102700 | 0.81774700  |
| H | 0.26922300  | 0.05564700  | 1.90335500  |
| C | -0.52259500 | -1.29852600 | 0.40897400  |

|    |             |             |             |
|----|-------------|-------------|-------------|
| H  | 0.05195100  | -2.17822600 | 0.70117600  |
| H  | -0.62244800 | -1.33662700 | -0.67797900 |
| N  | -0.23411100 | 2.38910800  | 0.87753200  |
| C  | -3.63219200 | -2.30087700 | -0.38770300 |
| C  | -2.54623000 | -2.71909200 | 0.37354000  |
| C  | -2.14409100 | -4.04191700 | 0.31405800  |
| C  | -2.86955500 | -4.91359800 | -0.49884200 |
| C  | -3.95731700 | -4.46852400 | -1.25064100 |
| C  | -4.36276500 | -3.13688800 | -1.21148400 |
| C  | -2.96006900 | -0.44249000 | 0.73386600  |
| C  | -1.94023600 | -1.51337700 | 1.04944600  |
| H  | -1.29554900 | -4.39725600 | 0.88602400  |
| H  | -2.58112500 | -5.95574500 | -0.54945200 |
| H  | -4.49620400 | -5.16784800 | -1.87675000 |
| H  | -5.20264200 | -2.77833800 | -1.79189700 |
| H  | -1.83028500 | -1.62367100 | 2.13124900  |
| C  | -3.13548100 | 0.86927900  | 1.31187100  |
| H  | -3.82739200 | 1.53366700  | 0.80459600  |
| C  | -2.53844300 | 1.24042200  | 2.44687400  |
| H  | -1.86291000 | 0.58609900  | 2.98611000  |
| N  | -3.82831400 | -0.92384900 | -0.12196600 |
| H  | -4.61013800 | -0.38626000 | -0.48569500 |
| H  | 0.30679200  | 2.54039600  | 1.71573500  |
| H  | -2.73113900 | 2.21590400  | 2.87451600  |
| Br | 5.50710200  | -0.74896500 | -0.49301900 |

Table S32. Calculated Gibbs free energy and XYZ coordinates for all atoms in **TS2a-endo** catalysed by IBr.

$G = -1594.6515$  Hartree    Frequency =  $-494.94$   $\text{cm}^{-1}$

|   |             |             |             |
|---|-------------|-------------|-------------|
| I | 2.37413500  | -0.73427000 | 0.29132100  |
| C | -0.02209500 | 3.34259400  | 0.12259000  |
| C | -0.91099600 | 2.77256900  | -0.82235000 |
| C | -1.48581500 | 3.60181500  | -1.79581800 |
| C | -1.16605200 | 4.94950800  | -1.80616500 |
| C | -0.27702100 | 5.49132900  | -0.86209600 |
| C | 0.30796100  | 4.69694400  | 0.11246500  |
| C | -0.19020000 | 1.13812300  | 0.57080500  |
| C | -1.00119300 | 1.37359200  | -0.51797200 |
| H | -2.16608300 | 3.18995000  | -2.53273700 |
| H | -1.60264000 | 5.59899600  | -2.55542100 |
| H | -0.04198800 | 6.54829200  | -0.89736600 |
| H | 0.99624400  | 5.11193400  | 0.83920800  |
| H | -1.58171000 | 0.63419100  | -1.04869800 |



|    |             |             |             |
|----|-------------|-------------|-------------|
| C  | -0.02321500 | -0.08834600 | 1.31739200  |
| H  | 0.63438600  | -0.11422000 | 2.17728700  |
| C  | -0.73762600 | -1.30686600 | 0.80959600  |
| H  | -0.24249200 | -2.21473000 | 1.15265500  |
| H  | -0.69827100 | -1.31555500 | -0.28047200 |
| N  | 0.38685900  | 2.33046500  | 0.96241300  |
| C  | -4.11536600 | -1.28780100 | -0.27829500 |
| C  | -3.09564900 | -2.15928300 | 0.11919700  |
| C  | -2.95435100 | -3.38416300 | -0.51070400 |
| C  | -3.84464300 | -3.71976500 | -1.53148000 |
| C  | -4.85507600 | -2.83725100 | -1.91287200 |
| C  | -5.00923300 | -1.59998100 | -1.29174500 |
| C  | -3.01948800 | -0.20030300 | 1.38549600  |
| C  | -2.29118700 | -1.49019700 | 1.19726900  |
| H  | -2.16535500 | -4.06843900 | -0.22017100 |
| H  | -3.74907800 | -4.67331700 | -2.03513800 |
| H  | -5.53420700 | -3.11556500 | -2.70936000 |
| H  | -5.79155200 | -0.91286700 | -1.58913000 |
| H  | -2.29826200 | -2.05877500 | 2.13118200  |
| C  | -2.56924100 | 0.76818800  | 2.26661800  |
| H  | -2.93973600 | 1.78409400  | 2.20592700  |
| C  | -1.43662300 | 0.44861600  | 3.00152700  |
| H  | -1.27243700 | -0.56352600 | 3.34862400  |
| N  | -4.04319900 | -0.13186300 | 0.50836300  |
| H  | -4.63133000 | 0.68056900  | 0.38836500  |
| H  | 1.07083500  | 2.42208200  | 1.69710300  |
| H  | -0.92759900 | 1.22082600  | 3.56686400  |
| Br | 4.71111800  | -1.36239300 | -0.76614000 |

Table S33. Calculated Gibbs free energy and XYZ coordinates for all atoms in **2a-endo** catalysed by IBr.

$G = -1594.7175$  Hartree

|   |             |             |             |
|---|-------------|-------------|-------------|
| I | 1.99356400  | -0.49165500 | -0.00203400 |
| C | 0.24697700  | 2.85950000  | 0.13659700  |
| C | -0.06656000 | 1.93640500  | -0.87944500 |
| C | 0.06484700  | 2.32061200  | -2.21799500 |
| C | 0.50561300  | 3.60310300  | -2.49835800 |
| C | 0.82386300  | 4.50481600  | -1.46833800 |
| C | 0.70229700  | 4.14783000  | -0.13510900 |
| C | -0.41244900 | 0.95528300  | 1.15206400  |
| C | -0.44849500 | 0.70630000  | -0.22118000 |
| H | -0.17040200 | 1.62516300  | -3.01491800 |
| H | 0.61182000  | 3.91979900  | -3.52865500 |

|    |             |             |             |
|----|-------------|-------------|-------------|
| H  | 1.17149800  | 5.49885500  | -1.72159400 |
| H  | 0.94776400  | 4.84009500  | 0.66102500  |
| H  | -0.91658900 | -0.15163400 | -0.68237200 |
| C  | -0.80855100 | 0.08399200  | 2.31055500  |
| H  | 0.07725100  | -0.06478100 | 2.93755300  |
| C  | -1.31053600 | -1.29111400 | 1.85029700  |
| H  | -1.25757400 | -1.96022300 | 2.71000100  |
| H  | -0.64353900 | -1.70767100 | 1.09222700  |
| N  | 0.01818000  | 2.22961900  | 1.35028100  |
| C  | -4.00690300 | -0.80260900 | -0.63136900 |
| C  | -3.03200400 | -1.66598500 | -0.11220700 |
| C  | -2.51894000 | -2.68693100 | -0.88824100 |
| C  | -2.98015300 | -2.83879000 | -2.20104500 |
| C  | -3.94957400 | -1.97748500 | -2.70446000 |
| C  | -4.48147100 | -0.94606800 | -1.92687800 |
| C  | -3.43987000 | 0.09398400  | 1.38454400  |
| C  | -2.76624200 | -1.26595000 | 1.32167300  |
| H  | -1.76276200 | -3.35612800 | -0.49100000 |
| H  | -2.58134600 | -3.62806200 | -2.82573800 |
| H  | -4.29858800 | -2.10196100 | -3.72276100 |
| H  | -5.23073800 | -0.27390100 | -2.32741500 |
| H  | -3.36251800 | -1.93305100 | 1.95823200  |
| C  | -3.11360600 | 1.03449900  | 2.27069700  |
| H  | -3.61246300 | 1.99627900  | 2.28709200  |
| C  | -1.91022300 | 0.78489200  | 3.14720900  |
| H  | -2.13717700 | 0.14375100  | 4.00679500  |
| N  | -4.36503800 | 0.14689500  | 0.33342800  |
| H  | -4.73864800 | 1.03987900  | 0.04572700  |
| H  | 0.21651200  | 2.63170500  | 2.25459000  |
| H  | -1.54162200 | 1.72731200  | 3.55633900  |
| Br | 4.32600300  | -1.60460100 | -0.02878300 |

Table S34. Calculated Gibbs free energy and XYZ coordinates for all atoms in **COM1a-exo** catalysed by IBr.

$G = -1594.6937$  Hartree

|   |            |            |             |
|---|------------|------------|-------------|
| C | 1.82130700 | 2.77404100 | -0.69195300 |
| C | 1.71151700 | 2.69100600 | 0.71874500  |
| C | 2.23363300 | 3.73361000 | 1.50476100  |
| C | 2.84220400 | 4.80125100 | 0.87709300  |
| C | 2.94151500 | 4.86138700 | -0.52972300 |
| C | 2.43486300 | 3.85643800 | -1.33078800 |
| C | 0.82524800 | 0.82426500 | -0.18552300 |
| C | 1.07696500 | 1.44773700 | 1.01472400  |

|    |             |             |             |
|----|-------------|-------------|-------------|
| H  | 2.16265000  | 3.69189700  | 2.58553600  |
| H  | 3.25150000  | 5.61114200  | 1.46871600  |
| H  | 3.42421900  | 5.71525100  | -0.98973600 |
| H  | 2.51173800  | 3.90085000  | -2.41055000 |
| H  | 0.84735600  | 1.05281600  | 1.99226100  |
| C  | 0.23571600  | -0.46744700 | -0.47907800 |
| H  | 0.17579200  | -0.74468300 | -1.52901500 |
| C  | -0.18165900 | -1.35545600 | 0.44835000  |
| H  | -0.08248100 | -1.15393000 | 1.50911000  |
| H  | -0.50819300 | -2.34712600 | 0.15759700  |
| N  | 1.27110900  | 1.63486600  | -1.21279100 |
| C  | 2.36677900  | -2.98519600 | -0.69115000 |
| C  | 2.49989200  | -2.92414500 | 0.71862500  |
| C  | 1.90340600  | -3.92893200 | 1.49822900  |
| C  | 1.19396600  | -4.93427700 | 0.86801700  |
| C  | 1.07016700  | -4.97026500 | -0.53546400 |
| C  | 1.65542500  | -4.00180300 | -1.33253300 |
| C  | 3.50994900  | -1.11190200 | -0.17718800 |
| C  | 3.23191600  | -1.73152900 | 1.01712400  |
| H  | 1.98893500  | -3.90619700 | 2.57872300  |
| H  | 0.72337100  | -5.71106200 | 1.45867700  |
| H  | 0.50829200  | -5.77251700 | -0.99839500 |
| H  | 1.56120100  | -4.02678200 | -2.41190100 |
| H  | 3.51899000  | -1.37296600 | 1.99323900  |
| C  | 4.18243000  | 0.14813100  | -0.47659300 |
| H  | 4.44206300  | 0.31434000  | -1.51905300 |
| C  | 4.45925300  | 1.08642300  | 0.42664900  |
| H  | 4.18584000  | 0.96882800  | 1.46936500  |
| N  | 2.99344700  | -1.87905500 | -1.20541500 |
| H  | 1.19049300  | 1.41959100  | -2.19414600 |
| H  | 3.07179200  | -1.65373800 | -2.18479200 |
| H  | 4.94595300  | 2.01159600  | 0.14320000  |
| I  | -2.67270900 | -0.13330100 | -0.00260900 |
| Br | -5.09156500 | 0.68276900  | -0.00077400 |

Table S35. Calculated Gibbs free energy and XYZ coordinates for all atoms in **TS1a-exo** catalysed by IBr.

|   |                          |                                        |             |
|---|--------------------------|----------------------------------------|-------------|
|   | $G = -1594.6646$ Hartree | Frequency = $-374.92$ cm <sup>-1</sup> |             |
| C | 2.08492500               | 3.14154200                             | 0.22255000  |
| C | 1.31407200               | 3.23543200                             | -0.96126000 |
| C | 1.56843400               | 4.28775200                             | -1.85505300 |
| C | 2.56536200               | 5.19629500                             | -1.55231600 |

|    |             |             |             |
|----|-------------|-------------|-------------|
| C  | 3.32126300  | 5.08094100  | -0.36973800 |
| C  | 3.09298400  | 4.05702100  | 0.53219200  |
| C  | 0.61899100  | 1.43343000  | 0.21405000  |
| C  | 0.38855300  | 2.14062600  | -0.94312200 |
| H  | 0.99300200  | 4.38100700  | -2.76883200 |
| H  | 2.77408500  | 6.01129100  | -2.23476100 |
| H  | 4.09782800  | 5.80745500  | -0.16324600 |
| H  | 3.67476200  | 3.96494900  | 1.44136600  |
| H  | -0.34234800 | 1.90153400  | -1.70049300 |
| C  | -0.03566700 | 0.24243200  | 0.74651700  |
| H  | 0.00126900  | 0.12982800  | 1.82558100  |
| C  | -1.14051800 | -0.31345400 | 0.07294600  |
| H  | -1.15980600 | -0.26633000 | -1.01057400 |
| H  | -1.64388300 | -1.17040600 | 0.50614800  |
| N  | 1.63428200  | 2.04569800  | 0.91928000  |
| C  | -4.56653300 | -0.51387200 | 0.26786300  |
| C  | -3.77506700 | 0.20140200  | -0.65018400 |
| C  | -3.96048300 | -0.00749000 | -2.02024000 |
| C  | -4.93165500 | -0.90790700 | -2.42618800 |
| C  | -5.71066800 | -1.61059700 | -1.49102200 |
| C  | -5.53972900 | -1.42823300 | -0.12872600 |
| C  | -3.18966100 | 0.80202600  | 1.47309900  |
| C  | -2.83235900 | 0.98498400  | 0.12222700  |
| H  | -3.36048700 | 0.52795600  | -2.74701500 |
| H  | -5.09568600 | -1.07768800 | -3.48301700 |
| H  | -6.45878800 | -2.31004700 | -1.84267100 |
| H  | -6.13470400 | -1.97000200 | 0.59602200  |
| H  | -2.28086000 | 1.84272200  | -0.23732900 |
| C  | -2.61922600 | 1.39342700  | 2.66454700  |
| H  | -3.01635900 | 1.05206000  | 3.61539400  |
| C  | -1.64111300 | 2.30237300  | 2.62805900  |
| H  | -1.23562700 | 2.67312100  | 1.69214500  |
| N  | -4.17765500 | -0.12286300 | 1.54071300  |
| H  | 2.03380800  | 1.68992700  | 1.77416100  |
| H  | -4.56834200 | -0.47912100 | 2.40154700  |
| H  | -1.23117500 | 2.71160100  | 3.54265600  |
| I  | 1.42996900  | -1.69072700 | 0.19834000  |
| Br | 3.28277500  | -3.64514100 | -0.23475100 |

Table S36. Calculated Gibbs free energy and XYZ coordinates for all atoms in **INT1a-exo** catalysed by IBr.

$G = -1594.6909$  Hartree

|    |             |             |             |
|----|-------------|-------------|-------------|
| C  | 2.08492500  | 3.14154200  | 0.22255000  |
| C  | 1.31407200  | 3.23543200  | -0.96126000 |
| C  | 1.56843400  | 4.28775200  | -1.85505300 |
| C  | 2.56536200  | 5.19629500  | -1.55231600 |
| C  | 3.32126300  | 5.08094100  | -0.36973800 |
| C  | 3.09298400  | 4.05702100  | 0.53219200  |
| C  | 0.61899100  | 1.43343000  | 0.21405000  |
| C  | 0.38855300  | 2.14062600  | -0.94312200 |
| H  | 0.99300200  | 4.38100700  | -2.76883200 |
| H  | 2.77408500  | 6.01129100  | -2.23476100 |
| H  | 4.09782800  | 5.80745500  | -0.16324600 |
| H  | 3.67476200  | 3.96494900  | 1.44136600  |
| H  | -0.34234800 | 1.90153400  | -1.70049300 |
| C  | -0.03566700 | 0.24243200  | 0.74651700  |
| H  | 0.00126900  | 0.12982800  | 1.82558100  |
| C  | -1.14051800 | -0.31345400 | 0.07294600  |
| H  | -1.15980600 | -0.26633000 | -1.01057400 |
| H  | -1.64388300 | -1.17040600 | 0.50614800  |
| N  | 1.63428200  | 2.04569800  | 0.91928000  |
| C  | -4.56653300 | -0.51387200 | 0.26786300  |
| C  | -3.77506700 | 0.20140200  | -0.65018400 |
| C  | -3.96048300 | -0.00749000 | -2.02024000 |
| C  | -4.93165500 | -0.90790700 | -2.42618800 |
| C  | -5.71066800 | -1.61059700 | -1.49102200 |
| C  | -5.53972900 | -1.42823300 | -0.12872600 |
| C  | -3.18966100 | 0.80202600  | 1.47309900  |
| C  | -2.83235900 | 0.98498400  | 0.12222700  |
| H  | -3.36048700 | 0.52795600  | -2.74701500 |
| H  | -5.09568600 | -1.07768800 | -3.48301700 |
| H  | -6.45878800 | -2.31004700 | -1.84267100 |
| H  | -6.13470400 | -1.97000200 | 0.59602200  |
| H  | -2.28086000 | 1.84272200  | -0.23732900 |
| C  | -2.61922600 | 1.39342700  | 2.66454700  |
| H  | -3.01635900 | 1.05206000  | 3.61539400  |
| C  | -1.64111300 | 2.30237300  | 2.62805900  |
| H  | -1.23562700 | 2.67312100  | 1.69214500  |
| N  | -4.17765500 | -0.12286300 | 1.54071300  |
| H  | 2.03380800  | 1.68992700  | 1.77416100  |
| H  | -4.56834200 | -0.47912100 | 2.40154700  |
| H  | -1.23117500 | 2.71160100  | 3.54265600  |
| I  | 1.42996900  | -1.69072700 | 0.19834000  |
| Br | 3.28277500  | -3.64514100 | -0.23475100 |

Table S37. Calculated Gibbs free energy and XYZ coordinates for all atoms in **TS2a-exo** catalysed by IBr.

|   | $G = -1594.6531$ Hartree | Frequency = $-505.71$ $\text{cm}^{-1}$ |             |
|---|--------------------------|----------------------------------------|-------------|
| C | 2.20820600               | 3.00956000                             | 0.27929400  |
| C | 1.39988100               | 3.14435700                             | -0.87570100 |
| C | 1.71556500               | 4.14317400                             | -1.80798800 |
| C | 2.80747300               | 4.96181300                             | -1.57291000 |
| C | 3.59775200               | 4.80604600                             | -0.42088600 |
| C | 3.30981600               | 3.82952600                             | 0.51982000  |
| C | 0.59725100               | 1.43215200                             | 0.37318400  |
| C | 0.38176700               | 2.13635600                             | -0.79196400 |
| H | 1.11386900               | 4.26798200                             | -2.70103600 |
| H | 3.06175800               | 5.73486200                             | -2.28814700 |
| H | 4.44773300               | 5.45950400                             | -0.26564100 |
| H | 3.91818000               | 3.70591700                             | 1.40794200  |
| H | -0.39011500              | 1.93612700                             | -1.51907700 |
| C | -0.17448400              | 0.34867700                             | 0.95015400  |
| H | 0.13395900               | -0.08337900                            | 1.89388900  |
| C | -1.35261300              | -0.17233500                            | 0.18751000  |
| H | -1.10060800              | -0.27203100                            | -0.87068600 |
| H | -1.64870600              | -1.16012500                            | 0.54287400  |
| N | 1.68547800               | 1.97728600                             | 1.02693000  |
| C | -4.77463600              | -0.26849600                            | 0.22668200  |
| C | -3.76293400              | 0.19355400                             | -0.62100100 |
| C | -3.89038800              | 0.04120600                             | -1.99141200 |
| C | -5.03749700              | -0.57452000                            | -2.49241200 |
| C | -6.03408300              | -1.03214900                            | -1.62976200 |
| C | -5.92076000              | -0.88751800                            | -0.24918400 |
| C | -3.22218000              | 0.65978600                             | 1.60041700  |
| C | -2.65743200              | 0.75184600                             | 0.22411000  |
| H | -3.11449100              | 0.39238600                             | -2.66274800 |
| H | -5.15583700              | -0.70148600                            | -3.56100800 |
| H | -6.91544300              | -1.51027600                            | -2.03925200 |
| H | -6.69314100              | -1.24246100                            | 0.42146400  |
| H | -2.34520500              | 1.76270700                             | -0.05588100 |
| C | -2.46815300              | 0.98085900                             | 2.71496700  |
| H | -2.72932500              | 0.59270900                             | 3.69216100  |
| C | -1.25535600              | 1.61809500                             | 2.48036600  |
| H | -1.16667400              | 2.34323000                             | 1.68131000  |
| N | -4.40884000              | 0.01650400                             | 1.54800500  |
| H | 2.09775600               | 1.59926100                             | 1.86561100  |
| H | -4.94769300              | -0.24884800                            | 2.36006500  |

|    |             |             |             |
|----|-------------|-------------|-------------|
| H  | -0.54853500 | 1.74400500  | 3.29302900  |
| I  | 1.49026000  | -1.65075300 | 0.27259700  |
| Br | 3.12168900  | -3.58624700 | -0.46533600 |

Table S38. Calculated Gibbs free energy and XYZ coordinates for all atoms in **2a-exo** catalysed by IBr.

$G = -1594.7176$  Hartree

|   |             |             |             |
|---|-------------|-------------|-------------|
| C | -2.23850100 | 2.65757300  | -0.12996500 |
| C | -1.88695800 | 2.05138800  | 1.09226700  |
| C | -2.70336300 | 2.24451600  | 2.21233500  |
| C | -3.83629700 | 3.02875900  | 2.07937500  |
| C | -4.17277100 | 3.61784900  | 0.84807900  |
| C | -3.38256500 | 3.44023600  | -0.27548900 |
| C | -0.33190900 | 1.49982800  | -0.48287300 |
| C | -0.68502800 | 1.28783100  | 0.84695600  |
| H | -2.45300700 | 1.78486800  | 3.16113000  |
| H | -4.47915800 | 3.19141800  | 2.93572200  |
| H | -5.06870900 | 4.22220000  | 0.77616300  |
| H | -3.64056900 | 3.89157500  | -1.22575900 |
| H | -0.06796400 | 0.80663100  | 1.59024400  |
| C | 0.87522800  | 1.07512300  | -1.26650000 |
| H | 0.51669100  | 0.59270300  | -2.18096300 |
| C | 1.75657100  | 0.05843300  | -0.50624700 |
| H | 1.19061900  | -0.45377900 | 0.27350200  |
| H | 2.09320300  | -0.71155300 | -1.20278100 |
| N | -1.26949400 | 2.30897200  | -1.05516800 |
| C | 5.24628500  | -0.03653500 | -0.03382600 |
| C | 4.04067500  | -0.21736200 | 0.66028700  |
| C | 3.95963000  | -1.14399900 | 1.68127900  |
| C | 5.09042900  | -1.90147300 | 2.00564100  |
| C | 6.27848000  | -1.71540600 | 1.30598600  |
| C | 6.37799800  | -0.77832500 | 0.27574000  |
| C | 3.76468900  | 1.37284500  | -1.05855900 |
| C | 3.00957900  | 0.72324100  | 0.08535800  |
| H | 3.02986700  | -1.28685000 | 2.22181600  |
| H | 5.04033400  | -2.63497900 | 2.80040100  |
| H | 7.14836100  | -2.30873200 | 1.56224800  |
| H | 7.30623400  | -0.63797800 | -0.26478500 |
| H | 2.70619700  | 1.47877600  | 0.82259000  |
| C | 3.11849100  | 2.11512000  | -1.95985200 |
| H | 3.60590400  | 2.54628500  | -2.82504100 |
| C | 1.65812100  | 2.36763400  | -1.69072300 |
| H | 1.54969400  | 3.09866800  | -0.87921100 |

|    |             |             |             |
|----|-------------|-------------|-------------|
| N  | 5.09106800  | 0.96044500  | -0.99453900 |
| H  | -1.29010900 | 2.55161500  | -2.03464500 |
| H  | 5.74530500  | 1.10591000  | -1.74693300 |
| H  | 1.17567800  | 2.80742800  | -2.56507600 |
| I  | -1.86456700 | -1.10282900 | -0.00933000 |
| Br | -3.07629300 | -3.28468100 | -0.58605100 |

Table S39. Calculated Gibbs free energy and XYZ coordinates for all atoms in **COM1b-endo** catalysed by IBr.

$G = -1594.6980$  Hartree

|   |             |             |             |
|---|-------------|-------------|-------------|
| C | -0.44607700 | 2.46010700  | -0.84303300 |
| C | -0.65721000 | 2.05539500  | 0.48940100  |
| C | -1.26378500 | 2.94281100  | 1.38404400  |
| C | -1.63970400 | 4.19380000  | 0.92324300  |
| C | -1.43247300 | 4.57088800  | -0.41502700 |
| C | -0.83499400 | 3.70911700  | -1.32039400 |
| C | 0.41957800  | 0.38832000  | -0.64010900 |
| C | -0.14788200 | 0.70751400  | 0.60491900  |
| H | -1.43629000 | 2.65452600  | 2.41424100  |
| H | -2.10783200 | 4.89557400  | 1.60257700  |
| H | -1.74598000 | 5.55380300  | -0.74438000 |
| H | -0.66875200 | 3.99651000  | -2.35141200 |
| H | 0.07004000  | 0.18466800  | 1.52394000  |
| C | 1.14802400  | -0.79395900 | -1.07365100 |
| H | 1.59605900  | -0.74287600 | -2.06077100 |
| C | 1.30586900  | -1.88187300 | -0.32196700 |
| H | 1.88996700  | -2.72243500 | -0.67586100 |
| H | 0.86824000  | -1.96147700 | 0.66784200  |
| N | 0.20984600  | 1.42577900  | -1.48868800 |
| C | 4.06890200  | -0.99799600 | 0.83533700  |
| C | 4.48447100  | -0.63057300 | -0.46820000 |
| C | 5.14771200  | -1.58339600 | -1.25935600 |
| C | 5.37751200  | -2.84343300 | -0.73959800 |
| C | 4.96508400  | -3.18118300 | 0.56545700  |
| C | 4.30930800  | -2.26678100 | 1.36921400  |
| C | 3.39651800  | 1.11867400  | 0.46140000  |
| C | 4.05128600  | 0.71537300  | -0.67950000 |
| H | 5.47092800  | -1.33232000 | -2.26324200 |
| H | 5.88689000  | -3.58735500 | -1.34032200 |
| H | 5.16503900  | -4.17616700 | 0.94443900  |
| H | 3.98428100  | -2.52415400 | 2.37039100  |
| H | 4.20373500  | 1.31409500  | -1.56415600 |
| C | 2.72687700  | 2.37037000  | 0.80005600  |



|    |             |             |             |
|----|-------------|-------------|-------------|
| H  | 2.33060800  | 2.43825200  | 1.81018100  |
| C  | 2.55352200  | 3.39273700  | -0.03542400 |
| H  | 2.91754900  | 3.36271000  | -1.05702100 |
| N  | 3.41372900  | 0.08102100  | 1.37184100  |
| H  | 3.01160400  | 0.12075100  | 2.29539600  |
| H  | 0.46237500  | 1.41744000  | -2.46652200 |
| H  | 2.02647700  | 4.28482400  | 0.27921900  |
| I  | -2.36198000 | -0.70892300 | 0.14798200  |
| Br | -4.55143500 | -2.08075700 | -0.12087300 |

Table S40. Calculated Gibbs free energy and XYZ coordinates for all atoms in **TS1b-endo** catalysed by IBr.

|   | $G = -1594.6638$ Hartree | Frequency = $-424.77$ $\text{cm}^{-1}$ |             |
|---|--------------------------|----------------------------------------|-------------|
| C | 2.34429400               | -2.55262700                            | -0.58480400 |
| C | 1.90167500               | -1.86606900                            | 0.55208300  |
| C | 2.58606700               | -2.00713700                            | 1.74980300  |
| C | 3.69900500               | -2.84603400                            | 1.78758200  |
| C | 4.12912400               | -3.51560800                            | 0.64135500  |
| C | 3.45800200               | -3.37676200                            | -0.57210700 |
| C | 0.44559000               | -1.47291200                            | -1.23165100 |
| C | 0.74685000               | -1.02513800                            | 0.15092800  |
| H | 2.26798200               | -1.46710500                            | 2.63402100  |
| H | 4.24259400               | -2.97278000                            | 2.71533200  |
| H | 5.00194300               | -4.15480200                            | 0.69189400  |
| H | 3.78989600               | -3.89330000                            | -1.46401600 |
| H | -0.09998100              | -0.96389900                            | 0.82522400  |
| C | -0.66140300              | -1.16740300                            | -2.01037400 |
| H | -0.71979000              | -1.58844900                            | -3.00771000 |
| C | -1.69590800              | -0.34053100                            | -1.54365600 |
| H | -2.33217100              | 0.12018300                             | -2.29036600 |
| H | -1.50624800              | 0.29785700                             | -0.68511900 |
| N | 1.47352100               | -2.25481100                            | -1.63882400 |
| C | -3.93659300              | -0.05195500                            | 1.02640900  |
| C | -4.13661500              | -0.23776900                            | -0.35091500 |
| C | -4.97608900              | 0.63376200                             | -1.04546400 |
| C | -5.60053400              | 1.65090300                             | -0.33997200 |
| C | -5.38532200              | 1.81812800                             | 1.03710800  |
| C | -4.54598900              | 0.97223600                             | 1.74479900  |
| C | -2.71646000              | -1.85548400                            | 0.43401800  |
| C | -3.26776500              | -1.33058200                            | -0.76886700 |
| H | -5.13850500              | 0.51407500                             | -2.11015200 |
| H | -6.26343400              | 2.33293500                             | -0.85738800 |
| H | -5.88248400              | 2.62722600                             | 1.55725900  |
| H | -4.37093200              | 1.10207200                             | 2.80533300  |

|    |             |             |             |
|----|-------------|-------------|-------------|
| H  | -3.46237400 | -1.95415300 | -1.62905800 |
| C  | -1.84906800 | -2.99062200 | 0.60381700  |
| H  | -1.47216200 | -3.18259800 | 1.60373600  |
| C  | -1.46137100 | -3.75759400 | -0.42332700 |
| H  | -1.84049400 | -3.60570800 | -1.42629700 |
| N  | -3.06677400 | -1.04742000 | 1.45970500  |
| H  | -2.73766000 | -1.15275300 | 2.40976100  |
| H  | 1.54349000  | -2.65044500 | -2.56508300 |
| H  | -0.76725200 | -4.57489900 | -0.27164600 |
| I  | 1.43539000  | 1.13729300  | 0.01077300  |
| Br | 2.29599300  | 3.99773700  | -0.09695500 |

Table S41. Calculated Gibbs free energy and XYZ coordinates for all atoms in **INT1b-endo** catalysed by IBr.

$G = -1594.6754$  Hartree

|   |             |             |             |
|---|-------------|-------------|-------------|
| C | -2.46560100 | -2.58788400 | 0.69000200  |
| C | -2.10069800 | -1.88239400 | -0.46435100 |
| C | -2.84979000 | -2.00399800 | -1.62154700 |
| C | -3.95947400 | -2.85112600 | -1.61948400 |
| C | -4.31291500 | -3.54446200 | -0.46347200 |
| C | -3.57385700 | -3.42253400 | 0.71327400  |
| C | -0.50550300 | -1.53324200 | 1.22971600  |
| C | -0.91148400 | -1.03989900 | -0.13581100 |
| H | -2.58380600 | -1.44140200 | -2.50945500 |
| H | -4.55438300 | -2.96235400 | -2.51705500 |
| H | -5.18207400 | -4.19127300 | -0.47365300 |
| H | -3.85550600 | -3.95940300 | 1.61064000  |
| H | -0.10816600 | -1.06039100 | -0.86740900 |
| C | 0.66257300  | -1.33064100 | 1.86799200  |
| H | 0.80952600  | -1.78409300 | 2.84372500  |
| C | 1.75058300  | -0.46970100 | 1.33676400  |
| H | 2.14957100  | 0.16092600  | 2.13378200  |
| H | 1.39955800  | 0.20454500  | 0.55279400  |
| N | -1.56284800 | -2.29212600 | 1.70668000  |
| C | 4.22558800  | -0.15827500 | -0.93883800 |
| C | 4.09688500  | -0.22778100 | 0.44504300  |
| C | 4.83267000  | 0.63582500  | 1.23931600  |
| C | 5.69401000  | 1.53471300  | 0.61190400  |
| C | 5.80549800  | 1.58210200  | -0.77923300 |
| C | 5.06330500  | 0.72962100  | -1.59047800 |
| C | 2.73669900  | -1.82731800 | -0.56773900 |
| C | 3.03227900  | -1.23536300 | 0.77634000  |
| H | 4.74658500  | 0.61443100  | 2.31898400  |

|    |             |             |             |
|----|-------------|-------------|-------------|
| H  | 6.28510200  | 2.21321400  | 1.21366800  |
| H  | 6.47722900  | 2.29678000  | -1.23699900 |
| H  | 5.13533800  | 0.76188500  | -2.66968500 |
| H  | 3.33300500  | -1.98842500 | 1.50686300  |
| C  | 1.86795200  | -2.92578000 | -0.88719900 |
| H  | 1.60837300  | -3.07014800 | -1.93079700 |
| C  | 1.39577300  | -3.74730200 | 0.05950700  |
| H  | 1.68109900  | -3.65032600 | 1.09835200  |
| N  | 3.37286400  | -1.14023900 | -1.49106600 |
| H  | 3.28708400  | -1.31844000 | -2.48676100 |
| H  | -1.53666300 | -2.77374300 | 2.59145800  |
| H  | 0.72476900  | -4.55752200 | -0.19922200 |
| I  | -1.47445000 | 1.09628400  | -0.03957100 |
| Br | -2.20708200 | 4.29319700  | 0.00567200  |

Table S42. Calculated Gibbs free energy and XYZ coordinates for all atoms in **TS2b-endo** catalysed by IBr.

|   | $G = -1594.6682$ Hartree | Frequency = $-245.28$ $\text{cm}^{-1}$ |             |
|---|--------------------------|----------------------------------------|-------------|
| C | 2.76313200               | -2.36663500                            | -0.61897900 |
| C | 2.35326200               | -1.70159400                            | 0.54215500  |
| C | 3.17149200               | -1.69390800                            | 1.65950800  |
| C | 4.39099500               | -2.36919800                            | 1.60082200  |
| C | 4.78604900               | -3.02183900                            | 0.43379200  |
| C | 3.97708100               | -3.02955200                            | -0.70204800 |
| C | 0.66587100               | -1.59070900                            | -1.08104000 |
| C | 1.04743400               | -1.04072800                            | 0.25625700  |
| H | 2.87361100               | -1.16353000                            | 2.55668100  |
| H | 5.04139900               | -2.37835300                            | 2.46623800  |
| H | 5.74085700               | -3.53247500                            | 0.40442000  |
| H | 4.28336700               | -3.53420800                            | -1.60986900 |
| H | 0.26895100               | -1.13748700                            | 1.00996200  |
| C | -0.56590100              | -1.54733400                            | -1.68320100 |
| H | -0.65404500              | -1.98797400                            | -2.67207400 |
| C | -1.67337400              | -0.66029400                            | -1.23397200 |
| H | -1.97281200              | -0.00643200                            | -2.05591700 |
| H | -1.37148500              | -0.01163200                            | -0.41013100 |
| N | 1.76289700               | -2.22915300                            | -1.58601700 |
| C | -4.28094000              | -0.44718100                            | 0.94288400  |
| C | -4.08903800              | -0.41682700                            | -0.43857500 |
| C | -4.81238700              | 0.47483400                             | -1.21241300 |
| C | -5.72277000              | 1.31858000                             | -0.57712400 |
| C | -5.89693600              | 1.27281500                             | 0.80657800  |
| C | -5.17387700              | 0.38434100                             | 1.59809200  |
| C | -2.74320700              | -2.06293900                            | 0.52512700  |

|    |             |             |             |
|----|-------------|-------------|-------------|
| C  | -3.01257100 | -1.40195300 | -0.78903900 |
| H  | -4.67419500 | 0.51882200  | -2.28638800 |
| H  | -6.29913100 | 2.02264700  | -1.16353500 |
| H  | -6.60578400 | 1.94231600  | 1.27736100  |
| H  | -5.30271400 | 0.34758000  | 2.67216100  |
| H  | -3.29356600 | -2.10360100 | -1.57668200 |
| C  | -1.73853800 | -3.02007600 | 0.70627900  |
| H  | -1.34216100 | -3.20863500 | 1.69669300  |
| C  | -1.14364800 | -3.54052800 | -0.41418000 |
| H  | -1.67694700 | -3.61518600 | -1.35105400 |
| N  | -3.43805700 | -1.43873600 | 1.47922300  |
| H  | -3.35312400 | -1.64117500 | 2.46727400  |
| H  | 1.79216100  | -2.65788300 | -2.49858900 |
| H  | -0.25049600 | -4.14957100 | -0.32991400 |
| I  | 1.36088200  | 1.16146900  | 0.06871200  |
| Br | 1.78807700  | 4.26224300  | -0.09761000 |

Table S43. Calculated Gibbs free energy and XYZ coordinates for all atoms in **2b-endo** catalysed by IBr.

$G = -1594.6937$  Hartree

|   |             |             |             |
|---|-------------|-------------|-------------|
| C | 2.33842200  | -2.55635700 | -0.27826300 |
| C | 1.81262200  | -2.07294500 | 0.93604700  |
| C | 2.52425200  | -2.28370900 | 2.12238800  |
| C | 3.72861600  | -2.96354300 | 2.06100000  |
| C | 4.23920800  | -3.42984400 | 0.83690000  |
| C | 3.55539600  | -3.23181700 | -0.35126700 |
| C | 0.38333800  | -1.53069600 | -0.75789700 |
| C | 0.58126900  | -1.38875700 | 0.61367300  |
| H | 2.13964700  | -1.91730900 | 3.06688000  |
| H | 4.29263600  | -3.13784700 | 2.96906400  |
| H | 5.18720200  | -3.95353400 | 0.82231400  |
| H | 3.94791700  | -3.58790200 | -1.29584900 |
| H | -0.14979300 | -1.02260400 | 1.31767600  |
| C | -0.77504000 | -1.17196600 | -1.64246700 |
| H | -0.35549700 | -0.82654700 | -2.59287700 |
| C | -1.66011300 | -0.04838500 | -1.04602900 |
| H | -1.47009400 | 0.89403200  | -1.56268900 |
| H | -1.41422200 | 0.11757900  | 0.00392200  |
| N | 1.44304800  | -2.21582600 | -1.27718900 |
| C | -4.72369500 | -0.34168800 | 0.67077000  |
| C | -4.05679200 | 0.47475700  | -0.25518800 |
| C | -4.28168600 | 1.83762700  | -0.26677100 |
| C | -5.17552500 | 2.38897400  | 0.65778900  |

|    |             |             |             |
|----|-------------|-------------|-------------|
| C  | -5.82783000 | 1.56813300  | 1.57235300  |
| C  | -5.61537400 | 0.18848000  | 1.59332200  |
| C  | -3.35859100 | -1.76542700 | -0.48686500 |
| C  | -3.16026600 | -0.39450900 | -1.10364600 |
| H  | -3.76876200 | 2.47350300  | -0.98034500 |
| H  | -5.35819800 | 3.45609900  | 0.66303300  |
| H  | -6.51678100 | 2.00464500  | 2.28594300  |
| H  | -6.12753100 | -0.44578300 | 2.30667400  |
| H  | -3.49054000 | -0.40037200 | -2.15014500 |
| C  | -2.57920800 | -2.78454100 | -0.85726100 |
| H  | -2.63927000 | -3.76994900 | -0.41361700 |
| C  | -1.59287600 | -2.47103800 | -1.95048300 |
| H  | -2.11510300 | -2.30075200 | -2.89968100 |
| N  | -4.35436600 | -1.67073800 | 0.47817800  |
| H  | -4.53690500 | -2.39759800 | 1.15164000  |
| H  | 1.58325600  | -2.38156700 | -2.26310400 |
| H  | -0.90758700 | -3.30275000 | -2.11697300 |
| I  | 1.64786300  | 1.12716300  | 0.05401400  |
| Br | 2.76015300  | 3.42367100  | -0.22829100 |

Table S44. Calculated Gibbs free energy and XYZ coordinates for all atoms in **COM1b-exo** catalysed by IBr.

$G = -1594.6970$  Hartree

|   |             |             |             |
|---|-------------|-------------|-------------|
| C | -0.85296200 | 2.81348900  | -0.36285500 |
| C | -0.54718300 | 2.00240100  | 0.75006400  |
| C | -0.85175300 | 2.46408000  | 2.03673100  |
| C | -1.44314200 | 3.70777700  | 2.17058000  |
| C | -1.74531900 | 4.49735700  | 1.04596900  |
| C | -1.45840100 | 4.06299400  | -0.23664700 |
| C | 0.13010400  | 0.94646700  | -1.15247700 |
| C | 0.03513600  | 0.78728000  | 0.23519900  |
| H | -0.62963400 | 1.85597700  | 2.90560500  |
| H | -1.68226500 | 4.08342500  | 3.15785300  |
| H | -2.21238100 | 5.46421700  | 1.18709700  |
| H | -1.69032200 | 4.66636600  | -1.10554300 |
| H | 0.55353300  | 0.02956400  | 0.80246600  |
| C | 0.72147500  | 0.07947500  | -2.16210500 |
| H | 0.54838200  | 0.35800700  | -3.19719100 |
| C | 1.44644700  | -0.99773200 | -1.86462300 |
| H | 1.65136800  | -1.28605700 | -0.83791700 |
| H | 1.86567900  | -1.61943100 | -2.64576700 |
| N | -0.43566900 | 2.13681000  | -1.49306500 |
| C | 4.40902200  | -1.14783700 | -0.19463100 |

|    |             |             |             |
|----|-------------|-------------|-------------|
| C  | 3.75565500  | -0.77721000 | 1.00792700  |
| C  | 3.64113400  | -1.72701600 | 2.03794800  |
| C  | 4.16125500  | -2.99191800 | 1.84288100  |
| C  | 4.80351100  | -3.33858300 | 0.63678600  |
| C  | 4.93719800  | -2.42688800 | -0.39405100 |
| C  | 3.71157700  | 0.98228100  | -0.40907000 |
| C  | 3.33220500  | 0.57995700  | 0.84905100  |
| H  | 3.14879400  | -1.46815900 | 2.96840500  |
| H  | 4.07617600  | -3.73436900 | 2.62712100  |
| H  | 5.19907100  | -4.33977500 | 0.51556500  |
| H  | 5.43117600  | -2.69139900 | -1.32151600 |
| H  | 2.81696300  | 1.19114000  | 1.57418000  |
| C  | 3.49589200  | 2.24213900  | -1.11217100 |
| H  | 4.09649500  | 2.40210500  | -2.00396100 |
| C  | 2.62104600  | 3.17205300  | -0.73037300 |
| H  | 1.98901700  | 3.03649600  | 0.14224200  |
| N  | 4.38204000  | -0.05711400 | -1.02504000 |
| H  | -0.53661100 | 2.47027300  | -2.44045100 |
| H  | 4.72147500  | -0.03845100 | -1.97395800 |
| H  | 2.51279600  | 4.09698600  | -1.28295600 |
| I  | -2.17722600 | -0.75322300 | -0.03879600 |
| Br | -4.28310500 | -2.24849600 | -0.09580500 |

Table S45. Calculated Gibbs free energy and XYZ coordinates for all atoms in **TS1b -exo** catalysed by IBr.

|   | $G = -1594.6628$ Hartree | Frequency = $-433.75$ $\text{cm}^{-1}$ |             |
|---|--------------------------|----------------------------------------|-------------|
| C | -2.22086800              | 2.81189700                             | -0.38129200 |
| C | -2.05603700              | 1.98245300                             | 0.73360900  |
| C | -2.93771500              | 2.08121900                             | 1.79922400  |
| C | -3.96735300              | 3.01844400                             | 1.72833500  |
| C | -4.12103200              | 3.82923700                             | 0.60307800  |
| C | -3.24710800              | 3.73780200                             | -0.47850900 |
| C | -0.34387800              | 1.58679000                             | -0.80940700 |
| C | -0.91528500              | 1.07437900                             | 0.45837000  |
| H | -2.83302500              | 1.43535200                             | 2.66315100  |
| H | -4.66252300              | 3.11295600                             | 2.55303200  |
| H | -4.93428400              | 4.54350200                             | 0.56606800  |
| H | -3.36392500              | 4.36537100                             | -1.35328700 |
| H | -0.21099500              | 0.88009300                             | 1.26122900  |
| C | 0.84192800               | 1.22512700                             | -1.43483700 |
| H | 1.12542800               | 1.76041700                             | -2.33251900 |
| C | 1.67996500               | 0.21753700                             | -0.92801000 |

|    |             |             |             |
|----|-------------|-------------|-------------|
| H  | 1.23885000  | -0.52660200 | -0.27208200 |
| H  | 2.43655000  | -0.18648600 | -1.59254000 |
| N  | -1.19070900 | 2.52992900  | -1.28566800 |
| C  | 4.94912500  | -0.19840500 | -0.01033900 |
| C  | 3.76445400  | -0.38032400 | 0.72260100  |
| C  | 3.54365300  | -1.59176900 | 1.37870400  |
| C  | 4.52000000  | -2.57339300 | 1.29759700  |
| C  | 5.69793300  | -2.36838100 | 0.56244400  |
| C  | 5.93242600  | -1.17816200 | -0.10874400 |
| C  | 3.76944700  | 1.71428700  | -0.20433000 |
| C  | 2.94649500  | 0.80766300  | 0.51700200  |
| H  | 2.63226200  | -1.76000600 | 1.94041600  |
| H  | 4.37191800  | -3.51777100 | 1.80603600  |
| H  | 6.43799500  | -3.15747100 | 0.51582600  |
| H  | 6.83716700  | -1.01790100 | -0.68179400 |
| H  | 2.19852000  | 1.14731100  | 1.21914300  |
| C  | 3.46956900  | 3.05694700  | -0.62652700 |
| H  | 4.18599100  | 3.54021900  | -1.28250200 |
| C  | 2.33898100  | 3.68145200  | -0.27665300 |
| H  | 1.62519000  | 3.23637800  | 0.40602300  |
| N  | 4.90646500  | 1.07925200  | -0.55993600 |
| H  | -1.06608000 | 2.99577000  | -2.17300100 |
| H  | 5.62241000  | 1.48046700  | -1.14976100 |
| H  | 2.11734900  | 4.67574400  | -0.64329900 |
| I  | -1.75535500 | -1.00921800 | 0.01974500  |
| Br | -2.81724200 | -3.71405300 | -0.48089400 |

Table S46. Calculated Gibbs free energy and XYZ coordinates for all atoms in **INT1b-exo** catalysed by IBr.

$G = -1594.6726$  Hartree

|   |             |             |             |
|---|-------------|-------------|-------------|
| C | -3.96333900 | -0.94130900 | 0.50990300  |
| C | -3.28136200 | -0.22251500 | -0.47731400 |
| C | -3.98081300 | 0.51507700  | -1.41500500 |
| C | -5.37583000 | 0.52533100  | -1.35903900 |
| C | -6.04377900 | -0.18946900 | -0.36674100 |
| C | -5.34976300 | -0.93553800 | 0.58529400  |
| C | -1.73259400 | -1.33333600 | 0.93963400  |
| C | -1.81064300 | -0.42940600 | -0.27975300 |
| H | -3.45130500 | 1.08811200  | -2.16813600 |
| H | -5.94011500 | 1.09928100  | -2.08283600 |
| H | -7.12634000 | -0.16531600 | -0.32854400 |

|    |             |             |             |
|----|-------------|-------------|-------------|
| H  | -5.87240900 | -1.48842200 | 1.35621500  |
| H  | -1.33811600 | -0.88303200 | -1.15160200 |
| C  | -0.65754400 | -1.86104900 | 1.55570400  |
| H  | -0.85137500 | -2.54737000 | 2.37303600  |
| C  | 0.77374200  | -1.49206300 | 1.31582600  |
| H  | 0.92332800  | -0.42248800 | 1.47545100  |
| H  | 1.40910000  | -2.00368500 | 2.04184400  |
| N  | -3.04497700 | -1.60916800 | 1.30861200  |
| C  | 3.70764500  | -2.08310300 | -0.31745300 |
| C  | 2.73169500  | -1.09529400 | -0.22768700 |
| C  | 3.10996400  | 0.23693200  | -0.18439900 |
| C  | 4.47243000  | 0.52878700  | -0.25323100 |
| C  | 5.43260900  | -0.48050200 | -0.34943900 |
| C  | 5.06543800  | -1.82327100 | -0.38094400 |
| C  | 1.73682400  | -3.20728600 | -0.28128300 |
| C  | 1.38492500  | -1.75879200 | -0.11291000 |
| H  | 2.38696900  | 1.04311200  | -0.10175300 |
| H  | 4.78422100  | 1.56567400  | -0.22788500 |
| H  | 6.48175500  | -0.21786000 | -0.39762800 |
| H  | 5.80062600  | -2.61504200 | -0.44951200 |
| H  | 0.68334300  | -1.42486600 | -0.88080500 |
| C  | 0.85651600  | -4.34627100 | -0.32787400 |
| H  | 1.30633400  | -5.32363600 | -0.19189800 |
| C  | -0.45370900 | -4.21984100 | -0.56189200 |
| H  | -0.91490700 | -3.25860600 | -0.74396800 |
| N  | 3.04101200  | -3.33230200 | -0.33380200 |
| H  | -3.28152800 | -2.05107200 | 2.18287400  |
| H  | 3.51695500  | -4.22644700 | -0.40572300 |
| H  | -1.09348700 | -5.09265700 | -0.59882000 |
| I  | -0.68961200 | 1.43750400  | -0.06176200 |
| Br | 1.69770500  | 3.80012500  | 0.24803000  |

Table S47. Calculated Gibbs free energy and XYZ coordinates for all atoms in **TS2b -exo** catalysed by IBr.

|                                                                    |            |             |             |
|--------------------------------------------------------------------|------------|-------------|-------------|
| $G = -1594.6648$ Hartree    Frequency = $-281.89$ cm <sup>-1</sup> |            |             |             |
| C                                                                  | 2.67583200 | -2.58509900 | -0.40656000 |
| C                                                                  | 2.37650200 | -1.76797800 | 0.68859400  |
| C                                                                  | 3.26600000 | -1.67851200 | 1.74649300  |
| C                                                                  | 4.44466700 | -2.42316500 | 1.69407200  |
| C                                                                  | 4.72989900 | -3.22692300 | 0.59088900  |
| C                                                                  | 3.84802200 | -3.31986100 | -0.48493900 |
| C                                                                  | 0.60374900 | -1.72447700 | -0.85279100 |



|    |             |             |             |
|----|-------------|-------------|-------------|
| C  | 1.08574600  | -1.07869400 | 0.40675700  |
| H  | 3.05434700  | -1.03358100 | 2.59155000  |
| H  | 5.14945600  | -2.36968500 | 2.51411900  |
| H  | 5.65480600  | -3.79001800 | 0.56488200  |
| H  | 4.06761300  | -3.94227500 | -1.34336000 |
| H  | 0.35842000  | -1.05495800 | 1.21551900  |
| C  | -0.64924100 | -1.65644600 | -1.41399700 |
| H  | -0.79656500 | -2.17311800 | -2.35488500 |
| C  | -1.65859200 | -0.63080000 | -1.01503000 |
| H  | -1.17858800 | 0.32187300  | -0.78631000 |
| H  | -2.35141200 | -0.44980800 | -1.83814600 |
| N  | 1.61813600  | -2.50924100 | -1.31640700 |
| C  | -4.83457100 | -0.38402500 | 0.17513700  |
| C  | -3.57545200 | 0.13376700  | 0.48244800  |
| C  | -3.44731900 | 1.46418100  | 0.84506600  |
| C  | -4.59881100 | 2.24876100  | 0.90082900  |
| C  | -5.84894400 | 1.71068600  | 0.59156100  |
| C  | -5.99163300 | 0.37654100  | 0.21883600  |
| C  | -3.40544800 | -2.13180200 | -0.04792600 |
| C  | -2.55780300 | -0.94567500 | 0.26789200  |
| H  | -2.47647000 | 1.88723900  | 1.07678900  |
| H  | -4.52191900 | 3.29075300  | 1.18385600  |
| H  | -6.72758100 | 2.34173100  | 0.63970500  |
| H  | -6.95900500 | -0.04403000 | -0.02404700 |
| H  | -1.89722000 | -1.10425800 | 1.12281900  |
| C  | -2.86262700 | -3.37212800 | -0.40373100 |
| H  | -3.44644900 | -4.07033100 | -0.99144800 |
| C  | -1.52390600 | -3.56329500 | -0.18074000 |
| H  | -1.01816700 | -3.05446400 | 0.62716000  |
| N  | -4.67887800 | -1.74330200 | -0.15566500 |
| H  | 1.58199800  | -3.01287000 | -2.19010200 |
| H  | -5.43442100 | -2.34986400 | -0.44722900 |
| H  | -1.01071100 | -4.42496500 | -0.59154400 |
| I  | 1.48143000  | 1.09985400  | 0.02168200  |
| Br | 1.95442400  | 4.10965300  | -0.41803300 |

Table S48. Calculated Gibbs free energy and XYZ coordinates for all atoms in **2b-exo** catalysed by IBr.

$G = -1594.7191$  Hartree

|   |            |             |             |
|---|------------|-------------|-------------|
| C | 2.99596900 | 0.73471500  | 0.71818200  |
| C | 3.02450700 | 1.10322400  | -0.64985800 |
| C | 3.84140500 | 0.37886600  | -1.52837500 |
| C | 4.57717900 | -0.68851900 | -1.04069900 |

|    |             |             |             |
|----|-------------|-------------|-------------|
| C  | 4.51842700  | -1.05246300 | 0.31607900  |
| C  | 3.72954900  | -0.34822900 | 1.21617300  |
| C  | 1.53778000  | 2.42823300  | 0.42096400  |
| C  | 2.08778200  | 2.17997700  | -0.80744600 |
| H  | 3.88050900  | 0.64066300  | -2.57945800 |
| H  | 5.20356700  | -1.26116000 | -1.71365300 |
| H  | 5.09808100  | -1.89723500 | 0.66787600  |
| H  | 3.68833200  | -0.62084900 | 2.26463500  |
| H  | 1.82097600  | 2.67491100  | -1.72775800 |
| C  | 0.43831700  | 3.36373200  | 0.84153800  |
| H  | 0.83242400  | 4.02191800  | 1.62319800  |
| C  | -0.73851000 | 2.55084500  | 1.43274800  |
| H  | -0.42410500 | 1.99448400  | 2.31973700  |
| H  | -1.53441600 | 3.23697700  | 1.73600300  |
| N  | 2.09785300  | 1.56309200  | 1.34353900  |
| C  | -3.23793700 | 0.82049700  | -0.61754500 |
| C  | -2.48877200 | 0.77981200  | 0.56794300  |
| C  | -2.89286200 | -0.01357000 | 1.62255600  |
| C  | -4.06485000 | -0.76840200 | 1.49496500  |
| C  | -4.79666100 | -0.72516200 | 0.31304500  |
| C  | -4.39356500 | 0.06823900  | -0.76500300 |
| C  | -1.59734600 | 2.38190600  | -0.89946000 |
| C  | -1.24708000 | 1.60751500  | 0.35308900  |
| H  | -2.30946900 | -0.05398600 | 2.53652500  |
| H  | -4.40111700 | -1.38943600 | 2.31591700  |
| H  | -5.70194800 | -1.31426500 | 0.22262500  |
| H  | -4.96893300 | 0.09661300  | -1.68267700 |
| H  | -0.43713500 | 0.91077100  | 0.09502500  |
| C  | -1.05402500 | 3.55452600  | -1.22625700 |
| H  | -1.38210300 | 4.08394200  | -2.11523900 |
| C  | -0.04579700 | 4.23719800  | -0.32950200 |
| H  | 0.81983900  | 4.57736300  | -0.90609300 |
| N  | -2.61869600 | 1.66694100  | -1.54625700 |
| H  | 1.87174300  | 1.53861200  | 2.32554900  |
| H  | -3.16292100 | 2.10757100  | -2.27345500 |
| H  | -0.50104000 | 5.14455700  | 0.08336700  |
| I  | 0.93584700  | -1.74501700 | 0.16681000  |
| Br | -1.30020900 | -2.57638300 | -0.54893800 |

Table S49. Calculated Gibbs free energy and XYZ coordinates for all atoms in **COM1a-endo** catalysed by ICl.

$G = -1637.8490$  Hartree

|   |            |            |             |
|---|------------|------------|-------------|
| C | 2.99596900 | 0.73471500 | 0.71818200  |
| C | 3.02450700 | 1.10322400 | -0.64985800 |

|    |             |             |             |
|----|-------------|-------------|-------------|
| C  | 3.84140500  | 0.37886600  | -1.52837500 |
| C  | 4.57717900  | -0.68851900 | -1.04069900 |
| C  | 4.51842700  | -1.05246300 | 0.31607900  |
| C  | 3.72954900  | -0.34822900 | 1.21617300  |
| C  | 1.53778000  | 2.42823300  | 0.42096400  |
| C  | 2.08778200  | 2.17997700  | -0.80744600 |
| H  | 3.88050900  | 0.64066300  | -2.57945800 |
| H  | 5.20356700  | -1.26116000 | -1.71365300 |
| H  | 5.09808100  | -1.89723500 | 0.66787600  |
| H  | 3.68833200  | -0.62084900 | 2.26463500  |
| H  | 1.82097600  | 2.67491100  | -1.72775800 |
| C  | 0.43831700  | 3.36373200  | 0.84153800  |
| H  | 0.83242400  | 4.02191800  | 1.62319800  |
| C  | -0.73851000 | 2.55084500  | 1.43274800  |
| H  | -0.42410500 | 1.99448400  | 2.31973700  |
| H  | -1.53441600 | 3.23697700  | 1.73600300  |
| N  | 2.09785300  | 1.56309200  | 1.34353900  |
| C  | -3.23793700 | 0.82049700  | -0.61754500 |
| C  | -2.48877200 | 0.77981200  | 0.56794300  |
| C  | -2.89286200 | -0.01357000 | 1.62255600  |
| C  | -4.06485000 | -0.76840200 | 1.49496500  |
| C  | -4.79666100 | -0.72516200 | 0.31304500  |
| C  | -4.39356500 | 0.06823900  | -0.76500300 |
| C  | -1.59734600 | 2.38190600  | -0.89946000 |
| C  | -1.24708000 | 1.60751500  | 0.35308900  |
| H  | -2.30946900 | -0.05398600 | 2.53652500  |
| H  | -4.40111700 | -1.38943600 | 2.31591700  |
| H  | -5.70194800 | -1.31426500 | 0.22262500  |
| H  | -4.96893300 | 0.09661300  | -1.68267700 |
| H  | -0.43713500 | 0.91077100  | 0.09502500  |
| C  | -1.05402500 | 3.55452600  | -1.22625700 |
| H  | -1.38210300 | 4.08394200  | -2.11523900 |
| C  | -0.04579700 | 4.23719800  | -0.32950200 |
| H  | 0.81983900  | 4.57736300  | -0.90609300 |
| N  | -2.61869600 | 1.66694100  | -1.54625700 |
| H  | 1.87174300  | 1.53861200  | 2.32554900  |
| H  | -3.16292100 | 2.10757100  | -2.27345500 |
| H  | -0.50104000 | 5.14455700  | 0.08336700  |
| I  | 0.93584700  | -1.74501700 | 0.16681000  |
| Br | -1.30020900 | -2.57638300 | -0.54893800 |

Table S50. Calculated Gibbs free energy and XYZ coordinates for all atoms in **TS1a-endo** catalysed by ICl.

$G = -1637.8217$  Hartree

Frequency =  $-386.64$   $\text{cm}^{-1}$

|    |             |             |             |
|----|-------------|-------------|-------------|
| I  | 1.91170700  | -2.11385700 | 0.08646800  |
| C  | 1.82372100  | 2.85625300  | 0.16778900  |
| C  | 0.92966400  | 2.72100800  | -0.92289400 |
| C  | 0.83725200  | 3.76481800  | -1.85791700 |
| C  | 1.61841200  | 4.89174000  | -1.68237400 |
| C  | 2.50017200  | 5.00369900  | -0.58992700 |
| C  | 2.61703400  | 3.99171200  | 0.34646600  |
| C  | 0.78658600  | 0.87110900  | 0.36396000  |
| C  | 0.28639500  | 1.44968100  | -0.77822000 |
| H  | 0.16686400  | 3.68273500  | -2.70584800 |
| H  | 1.55823000  | 5.70356200  | -2.39711600 |
| H  | 3.10067300  | 5.89883300  | -0.48227500 |
| H  | 3.29847400  | 4.07413200  | 1.18467000  |
| H  | -0.45550700 | 1.02206800  | -1.43484100 |
| C  | 0.43657100  | -0.38608800 | 1.01862800  |
| H  | 0.74290000  | -0.47950200 | 2.05661300  |
| C  | -0.72164100 | -1.08495700 | 0.62010400  |
| H  | -0.95939200 | -2.02099000 | 1.10901800  |
| H  | -1.05305400 | -1.00223500 | -0.40976300 |
| N  | 1.72095400  | 1.71329100  | 0.92341600  |
| C  | -3.76860900 | 0.15370800  | -0.49618000 |
| C  | -3.49544200 | -0.83711800 | 0.46662800  |
| C  | -4.05421600 | -2.10945600 | 0.31527900  |
| C  | -4.87223500 | -2.34718100 | -0.77762000 |
| C  | -5.13098600 | -1.34335700 | -1.72577100 |
| C  | -4.58133000 | -0.07755500 | -1.60353800 |
| C  | -2.40832600 | 1.09006900  | 1.03913000  |
| C  | -2.55536900 | -0.26227200 | 1.40785700  |
| H  | -3.85501300 | -2.89005500 | 1.04010500  |
| H  | -5.32079600 | -3.32417500 | -0.90769500 |
| H  | -5.77204400 | -1.56367300 | -2.57022600 |
| H  | -4.77560000 | 0.69835900  | -2.33363000 |
| H  | -2.36560000 | -0.63059300 | 2.40447300  |
| C  | -1.67309900 | 2.15132600  | 1.70057500  |
| H  | -1.58440900 | 3.08976600  | 1.16139100  |
| C  | -1.10609900 | 2.00704600  | 2.89973000  |
| H  | -1.18298000 | 1.08367200  | 3.46283500  |
| N  | -3.09474200 | 1.30258900  | -0.11021200 |
| H  | -3.08981200 | 2.17371800  | -0.62219400 |
| H  | 2.23514000  | 1.52124500  | 1.76907500  |
| H  | -0.55154400 | 2.81978900  | 3.35059200  |
| Cl | 3.72639900  | -3.76226400 | -0.78944900 |

Table S51. Calculated Gibbs free energy and XYZ coordinates for all atoms in **INT1a-**

endo catalysed by ICl.

G= -1637.8503 Hartree

|    |             |             |             |
|----|-------------|-------------|-------------|
| I  | 1.91170700  | -2.11385700 | 0.08646800  |
| C  | 1.82372100  | 2.85625300  | 0.16778900  |
| C  | 0.92966400  | 2.72100800  | -0.92289400 |
| C  | 0.83725200  | 3.76481800  | -1.85791700 |
| C  | 1.61841200  | 4.89174000  | -1.68237400 |
| C  | 2.50017200  | 5.00369900  | -0.58992700 |
| C  | 2.61703400  | 3.99171200  | 0.34646600  |
| C  | 0.78658600  | 0.87110900  | 0.36396000  |
| C  | 0.28639500  | 1.44968100  | -0.77822000 |
| H  | 0.16686400  | 3.68273500  | -2.70584800 |
| H  | 1.55823000  | 5.70356200  | -2.39711600 |
| H  | 3.10067300  | 5.89883300  | -0.48227500 |
| H  | 3.29847400  | 4.07413200  | 1.18467000  |
| H  | -0.45550700 | 1.02206800  | -1.43484100 |
| C  | 0.43657100  | -0.38608800 | 1.01862800  |
| H  | 0.74290000  | -0.47950200 | 2.05661300  |
| C  | -0.72164100 | -1.08495700 | 0.62010400  |
| H  | -0.95939200 | -2.02099000 | 1.10901800  |
| H  | -1.05305400 | -1.00223500 | -0.40976300 |
| N  | 1.72095400  | 1.71329100  | 0.92341600  |
| C  | -3.76860900 | 0.15370800  | -0.49618000 |
| C  | -3.49544200 | -0.83711800 | 0.46662800  |
| C  | -4.05421600 | -2.10945600 | 0.31527900  |
| C  | -4.87223500 | -2.34718100 | -0.77762000 |
| C  | -5.13098600 | -1.34335700 | -1.72577100 |
| C  | -4.58133000 | -0.07755500 | -1.60353800 |
| C  | -2.40832600 | 1.09006900  | 1.03913000  |
| C  | -2.55536900 | -0.26227200 | 1.40785700  |
| H  | -3.85501300 | -2.89005500 | 1.04010500  |
| H  | -5.32079600 | -3.32417500 | -0.90769500 |
| H  | -5.77204400 | -1.56367300 | -2.57022600 |
| H  | -4.77560000 | 0.69835900  | -2.33363000 |
| H  | -2.36560000 | -0.63059300 | 2.40447300  |
| C  | -1.67309900 | 2.15132600  | 1.70057500  |
| H  | -1.58440900 | 3.08976600  | 1.16139100  |
| C  | -1.10609900 | 2.00704600  | 2.89973000  |
| H  | -1.18298000 | 1.08367200  | 3.46283500  |
| N  | -3.09474200 | 1.30258900  | -0.11021200 |
| H  | -3.08981200 | 2.17371800  | -0.62219400 |
| H  | 2.23514000  | 1.52124500  | 1.76907500  |
| H  | -0.55154400 | 2.81978900  | 3.35059200  |
| Cl | 3.72639900  | -3.76226400 | -0.78944900 |

Table S52. Calculated Gibbs free energy and XYZ coordinates for all atoms in **TS2a-endo** catalysed by ICl.

$G = -1637.8067$  Hartree      Frequency =  $-525.72 \text{ cm}^{-1}$

|   |             |             |             |
|---|-------------|-------------|-------------|
| I | 2.35751300  | -1.65152600 | 0.03018100  |
| C | 1.37771100  | 2.95146500  | 0.14721900  |
| C | 0.32102300  | 2.74122300  | -0.77250900 |
| C | 0.00132100  | 3.76162000  | -1.67934100 |
| C | 0.72850800  | 4.94007300  | -1.65009100 |
| C | 1.77695400  | 5.12317600  | -0.73210400 |
| C | 2.11703700  | 4.13285000  | 0.17668400  |
| C | 0.54130500  | 0.88901100  | 0.51184700  |
| C | -0.19390500 | 1.42545800  | -0.52135300 |
| H | -0.80070900 | 3.62520600  | -2.39595400 |
| H | 0.49156600  | 5.73430700  | -2.34785500 |
| H | 2.33118800  | 6.05401700  | -0.73554900 |
| H | 2.92662600  | 4.27031000  | 0.88366500  |
| H | -0.99891300 | 0.93632300  | -1.04853800 |
| C | 0.34203700  | -0.36961600 | 1.20203400  |
| H | 1.00384300  | -0.65484200 | 2.01146300  |
| C | -0.73863100 | -1.27869600 | 0.68426500  |
| H | -0.52613900 | -2.31490600 | 0.94530300  |
| H | -0.75897100 | -1.22410100 | -0.40506400 |
| N | 1.47763000  | 1.81735400  | 0.92256800  |
| C | -4.00387900 | -0.18494300 | -0.15521800 |
| C | -3.27934800 | -1.34498400 | 0.13888400  |
| C | -3.56262800 | -2.52133000 | -0.53389100 |
| C | -4.57560800 | -2.51726700 | -1.49373600 |
| C | -5.28688000 | -1.35045200 | -1.77226700 |
| C | -5.01283900 | -0.15803200 | -1.10609600 |
| C | -2.52869200 | 0.43063100  | 1.45704800  |
| C | -2.24489300 | -1.00924200 | 1.17574600  |
| H | -3.00707400 | -3.42782100 | -0.32243300 |
| H | -4.81108300 | -3.42792200 | -2.02975700 |
| H | -6.06794800 | -1.36783500 | -2.52244100 |
| H | -5.56311400 | 0.74921500  | -1.32232400 |
| H | -2.37148400 | -1.59665400 | 2.08931800  |
| C | -1.74728400 | 1.16447100  | 2.32975200  |
| H | -1.78155800 | 2.24697200  | 2.32768300  |
| C | -0.72367600 | 0.46686600  | 2.96325700  |
| H | -0.87653700 | -0.55585700 | 3.28468400  |
| N | -3.53094600 | 0.85291900  | 0.65709600  |
| H | -3.85052600 | 1.80970500  | 0.60824200  |

|    |            |             |             |
|----|------------|-------------|-------------|
| H  | 2.18357000 | 1.65073300  | 1.62246200  |
| H  | 0.03449900 | 1.01333400  | 3.51269900  |
| Cl | 4.23658800 | -2.84911100 | -1.11962600 |

Table S53. Calculated Gibbs free energy and XYZ coordinates for all atoms in **2a-endo** catalysed by ICl.

$G = -1637.8732$  Hartree

|   |             |             |             |
|---|-------------|-------------|-------------|
| I | 2.08063000  | -1.12222000 | 0.01524300  |
| C | 1.21928200  | 2.52374900  | 0.09950700  |
| C | 0.72702500  | 1.66025200  | -0.89457700 |
| C | 0.94354600  | 1.96895500  | -2.23970300 |
| C | 1.64399900  | 3.12421900  | -2.54715900 |
| C | 2.13809300  | 3.96637900  | -1.53771100 |
| C | 1.93684100  | 3.67892700  | -0.19666300 |
| C | 0.16038300  | 0.83920500  | 1.16482700  |
| C | 0.09576900  | 0.54776500  | -0.20846700 |
| H | 0.57425700  | 1.31523800  | -3.02074500 |
| H | 1.81971600  | 3.38356300  | -3.58387100 |
| H | 2.68758600  | 4.85835600  | -1.81208700 |
| H | 2.31722000  | 4.32525900  | 0.58458900  |
| H | -0.59195400 | -0.16218500 | -0.64632200 |
| C | -0.44395000 | 0.12068700  | 2.33833900  |
| H | 0.37372900  | -0.20203200 | 2.99165100  |
| C | -1.24179200 | -1.11815600 | 1.91008400  |
| H | -1.36344600 | -1.74466700 | 2.79445300  |
| H | -0.67394700 | -1.70930500 | 1.18867700  |
| N | 0.85050100  | 1.99023400  | 1.32964300  |
| C | -3.70012900 | -0.11632300 | -0.66412500 |
| C | -2.95893600 | -1.15966800 | -0.09167700 |
| C | -2.67567500 | -2.29733400 | -0.82220800 |
| C | -3.13168800 | -2.38634800 | -2.14250100 |
| C | -3.86898900 | -1.34602200 | -2.69851600 |
| C | -4.16824100 | -0.19395100 | -1.96745000 |
| C | -2.98252300 | 0.70078600  | 1.33707400  |
| C | -2.63975900 | -0.77876800 | 1.33697700  |
| H | -2.10040800 | -3.10656900 | -0.38461500 |
| H | -2.90939500 | -3.26673100 | -2.73215300 |
| H | -4.21561100 | -1.42420100 | -3.72220000 |
| H | -4.73657700 | 0.61591300  | -2.40872600 |
| H | -3.38815100 | -1.26677700 | 1.97521400  |
| C | -2.46397200 | 1.57507000  | 2.19944900  |
| H | -2.72994100 | 2.62508100  | 2.17178300  |
| C | -1.36874800 | 1.09050400  | 3.11881800  |

|    |             |             |             |
|----|-------------|-------------|-------------|
| H  | -1.75391900 | 0.55490400  | 3.99382700  |
| N  | -3.85054400 | 0.92435400  | 0.26084200  |
| H  | -4.00703600 | 1.86795100  | -0.06300300 |
| H  | 1.11970000  | 2.36971600  | 2.22631400  |
| H  | -0.79979700 | 1.93893100  | 3.50321100  |
| Cl | 3.98715800  | -2.72332100 | 0.00216500  |

Table S54. Calculated Gibbs free energy and XYZ coordinates for all atoms in **COM1a-exo** catalysed by ICl.

$G = -1637.8473$  Hartree

|   |             |             |             |
|---|-------------|-------------|-------------|
| C | -2.54385100 | -1.90936800 | -0.66821800 |
| C | -2.44946000 | -1.82773300 | 0.74393300  |
| C | -3.41993300 | -2.47379700 | 1.53172300  |
| C | -4.43498600 | -3.16337300 | 0.90314000  |
| C | -4.50935500 | -3.23045600 | -0.50610100 |
| C | -3.57254400 | -2.61023100 | -1.30806400 |
| C | -0.76774800 | -0.63186300 | -0.16432800 |
| C | -1.31802700 | -1.01315600 | 1.03890200  |
| H | -3.36826400 | -2.42363700 | 2.61313000  |
| H | -5.19098800 | -3.66595800 | 1.49398900  |
| H | -5.32022300 | -3.78229100 | -0.96609800 |
| H | -3.63079200 | -2.65933700 | -2.38866800 |
| H | -0.96235100 | -0.72518700 | 2.01608600  |
| C | 0.36275700  | 0.22085000  | -0.45375300 |
| H | 0.54197500  | 0.45426100  | -1.50043500 |
| C | 1.15922500  | 0.80305200  | 0.48291700  |
| H | 0.96621800  | 0.67406400  | 1.54159200  |
| H | 1.88157400  | 1.55760500  | 0.19504700  |
| N | -1.51241700 | -1.18114600 | -1.19186600 |
| C | -0.27161400 | 3.43467600  | -0.70314600 |
| C | -0.45494800 | 3.44973700  | 0.70227100  |
| C | 0.53386000  | 4.03999100  | 1.50703300  |
| C | 1.65888100  | 4.57167900  | 0.90487100  |
| C | 1.82166700  | 4.53933800  | -0.49487600 |
| C | 0.86091700  | 3.97551800  | -1.31638700 |
| C | -2.19339900 | 2.35248100  | -0.23690700 |
| C | -1.68120500 | 2.76260100  | 0.97023900  |
| H | 0.41956100  | 4.06427100  | 2.58479700  |
| H | 2.43208300  | 5.02291900  | 1.51491400  |
| H | 2.71470000  | 4.96585000  | -0.93538700 |
| H | 0.98445100  | 3.94823100  | -2.39272300 |
| H | -2.13208500 | 2.59160800  | 1.93524600  |
| C | -3.38485300 | 1.57594600  | -0.56479900 |



|    |             |             |             |
|----|-------------|-------------|-------------|
| H  | -3.67014200 | 1.55781900  | -1.61368800 |
| C  | -4.10160300 | 0.89022400  | 0.32351000  |
| H  | -3.82856000 | 0.86200100  | 1.37253100  |
| N  | -1.34130900 | 2.76777100  | -1.24405100 |
| H  | -1.30485800 | -1.08363300 | -2.17355200 |
| H  | -1.49789800 | 2.61513200  | -2.22807200 |
| H  | -4.97194200 | 0.32030000  | 0.02234900  |
| I  | 2.69641400  | -1.28776500 | 0.00468300  |
| Cl | 4.42594300  | -3.04032700 | -0.02586000 |

Table S55. Calculated Gibbs free energy and XYZ coordinates for all atoms in **TS1a-exo** catalysed by ICl.

|   | $G = -1637.8218$ Hartree | Frequency = $-373.78$ cm <sup>-1</sup> |             |
|---|--------------------------|----------------------------------------|-------------|
| C | -2.54385100              | -1.90936800                            | -0.66821800 |
| C | -2.44946000              | -1.82773300                            | 0.74393300  |
| C | -3.41993300              | -2.47379700                            | 1.53172300  |
| C | -4.43498600              | -3.16337300                            | 0.90314000  |
| C | -4.50935500              | -3.23045600                            | -0.50610100 |
| C | -3.57254400              | -2.61023100                            | -1.30806400 |
| C | -0.76774800              | -0.63186300                            | -0.16432800 |
| C | -1.31802700              | -1.01315600                            | 1.03890200  |
| H | -3.36826400              | -2.42363700                            | 2.61313000  |
| H | -5.19098800              | -3.66595800                            | 1.49398900  |
| H | -5.32022300              | -3.78229100                            | -0.96609800 |
| H | -3.63079200              | -2.65933700                            | -2.38866800 |
| H | -0.96235100              | -0.72518700                            | 2.01608600  |
| C | 0.36275700               | 0.22085000                             | -0.45375300 |
| H | 0.54197500               | 0.45426100                             | -1.50043500 |
| C | 1.15922500               | 0.80305200                             | 0.48291700  |
| H | 0.96621800               | 0.67406400                             | 1.54159200  |
| H | 1.88157400               | 1.55760500                             | 0.19504700  |
| N | -1.51241700              | -1.18114600                            | -1.19186600 |
| C | -0.27161400              | 3.43467600                             | -0.70314600 |
| C | -0.45494800              | 3.44973700                             | 0.70227100  |
| C | 0.53386000               | 4.03999100                             | 1.50703300  |
| C | 1.65888100               | 4.57167900                             | 0.90487100  |
| C | 1.82166700               | 4.53933800                             | -0.49487600 |
| C | 0.86091700               | 3.97551800                             | -1.31638700 |
| C | -2.19339900              | 2.35248100                             | -0.23690700 |
| C | -1.68120500              | 2.76260100                             | 0.97023900  |
| H | 0.41956100               | 4.06427100                             | 2.58479700  |
| H | 2.43208300               | 5.02291900                             | 1.51491400  |
| H | 2.71470000               | 4.96585000                             | -0.93538700 |
| H | 0.98445100               | 3.94823100                             | -2.39272300 |

|    |             |             |             |
|----|-------------|-------------|-------------|
| H  | -2.13208500 | 2.59160800  | 1.93524600  |
| C  | -3.38485300 | 1.57594600  | -0.56479900 |
| H  | -3.67014200 | 1.55781900  | -1.61368800 |
| C  | -4.10160300 | 0.89022400  | 0.32351000  |
| H  | -3.82856000 | 0.86200100  | 1.37253100  |
| N  | -1.34130900 | 2.76777100  | -1.24405100 |
| H  | -1.30485800 | -1.08363300 | -2.17355200 |
| H  | -1.49789800 | 2.61513200  | -2.22807200 |
| H  | -4.97194200 | 0.32030000  | 0.02234900  |
| I  | 2.69641400  | -1.28776500 | 0.00468300  |
| Cl | 4.42594300  | -3.04032700 | -0.02586000 |

Table S56. Calculated Gibbs free energy and XYZ coordinates for all atoms in **INT1a-exo** catalysed by ICl.

$G = -1637.8502$  Hartree

|   |             |             |             |
|---|-------------|-------------|-------------|
| C | -2.54385100 | -1.90936800 | -0.66821800 |
| C | -2.44946000 | -1.82773300 | 0.74393300  |
| C | -3.41993300 | -2.47379700 | 1.53172300  |
| C | -4.43498600 | -3.16337300 | 0.90314000  |
| C | -4.50935500 | -3.23045600 | -0.50610100 |
| C | -3.57254400 | -2.61023100 | -1.30806400 |
| C | -0.76774800 | -0.63186300 | -0.16432800 |
| C | -1.31802700 | -1.01315600 | 1.03890200  |
| H | -3.36826400 | -2.42363700 | 2.61313000  |
| H | -5.19098800 | -3.66595800 | 1.49398900  |
| H | -5.32022300 | -3.78229100 | -0.96609800 |
| H | -3.63079200 | -2.65933700 | -2.38866800 |
| H | -0.96235100 | -0.72518700 | 2.01608600  |
| C | 0.36275700  | 0.22085000  | -0.45375300 |
| H | 0.54197500  | 0.45426100  | -1.50043500 |
| C | 1.15922500  | 0.80305200  | 0.48291700  |
| H | 0.96621800  | 0.67406400  | 1.54159200  |
| H | 1.88157400  | 1.55760500  | 0.19504700  |
| N | -1.51241700 | -1.18114600 | -1.19186600 |
| C | -0.27161400 | 3.43467600  | -0.70314600 |
| C | -0.45494800 | 3.44973700  | 0.70227100  |
| C | 0.53386000  | 4.03999100  | 1.50703300  |
| C | 1.65888100  | 4.57167900  | 0.90487100  |
| C | 1.82166700  | 4.53933800  | -0.49487600 |
| C | 0.86091700  | 3.97551800  | -1.31638700 |
| C | -2.19339900 | 2.35248100  | -0.23690700 |
| C | -1.68120500 | 2.76260100  | 0.97023900  |

|    |             |             |             |
|----|-------------|-------------|-------------|
| H  | 0.41956100  | 4.06427100  | 2.58479700  |
| H  | 2.43208300  | 5.02291900  | 1.51491400  |
| H  | 2.71470000  | 4.96585000  | -0.93538700 |
| H  | 0.98445100  | 3.94823100  | -2.39272300 |
| H  | -2.13208500 | 2.59160800  | 1.93524600  |
| C  | -3.38485300 | 1.57594600  | -0.56479900 |
| H  | -3.67014200 | 1.55781900  | -1.61368800 |
| C  | -4.10160300 | 0.89022400  | 0.32351000  |
| H  | -3.82856000 | 0.86200100  | 1.37253100  |
| N  | -1.34130900 | 2.76777100  | -1.24405100 |
| H  | -1.30485800 | -1.08363300 | -2.17355200 |
| H  | -1.49789800 | 2.61513200  | -2.22807200 |
| H  | -4.97194200 | 0.32030000  | 0.02234900  |
| I  | 2.69641400  | -1.28776500 | 0.00468300  |
| Cl | 4.42594300  | -3.04032700 | -0.02586000 |

Table S57. Calculated Gibbs free energy and XYZ coordinates for all atoms in **TS2a-exo** catalysed by ICl.

$G=-1637.8087$  Hartree      Frequency =  $-539.92$  cm<sup>-1</sup>

|   |             |             |             |
|---|-------------|-------------|-------------|
| C | -3.09459400 | -1.94996300 | 0.31800800  |
| C | -2.33934000 | -2.36119800 | -0.80663700 |
| C | -2.89574500 | -3.30037400 | -1.68675600 |
| C | -4.16485700 | -3.79177600 | -1.43100300 |
| C | -4.89761200 | -3.36445900 | -0.30998000 |
| C | -4.37395500 | -2.43872800 | 0.57873100  |
| C | -1.12919600 | -0.84333400 | 0.36077000  |
| C | -1.09396500 | -1.64881800 | -0.75616100 |
| H | -2.33961500 | -3.63283200 | -2.55581700 |
| H | -4.60529500 | -4.51608800 | -2.10566000 |
| H | -5.88972300 | -3.76411900 | -0.13813800 |
| H | -4.93640000 | -2.10451000 | 1.44240900  |
| H | -0.29078400 | -1.70268500 | -1.47512900 |
| C | -0.10400100 | 0.03453300  | 0.89903400  |
| H | -0.30615200 | 0.60406000  | 1.79868300  |
| C | 1.17847900  | 0.18533000  | 0.13559000  |
| H | 0.96882200  | 0.27954700  | -0.93221600 |
| H | 1.71337900  | 1.08632900  | 0.43887500  |
| N | -2.32716800 | -1.04509100 | 1.01808800  |
| C | 4.50945100  | -0.60565500 | 0.28689400  |
| C | 3.42730400  | -0.83840600 | -0.56771100 |
| C | 3.61668900  | -0.81395100 | -1.93903300 |
| C | 4.89539800  | -0.55650900 | -2.43416300 |

|    |             |             |             |
|----|-------------|-------------|-------------|
| C  | 5.96161700  | -0.32487800 | -1.56481600 |
| C  | 5.78782200  | -0.34514700 | -0.18291800 |
| C  | 2.74180200  | -0.99889900 | 1.65869300  |
| C  | 2.19787500  | -1.03444700 | 0.26939400  |
| H  | 2.78855900  | -0.98996100 | -2.61623300 |
| H  | 5.06264100  | -0.53406800 | -3.50352500 |
| H  | 6.94614500  | -0.12520200 | -1.96970900 |
| H  | 6.61393100  | -0.16735100 | 0.49402800  |
| H  | 1.64347000  | -1.94986900 | 0.04014600  |
| C  | 1.90790400  | -1.03141500 | 2.75880900  |
| H  | 2.24081700  | -0.66114000 | 3.72083000  |
| C  | 0.57084200  | -1.33757900 | 2.51094400  |
| H  | 0.31682100  | -2.08549100 | 1.76988400  |
| N  | 4.05804800  | -0.69698200 | 1.60913800  |
| H  | -2.63550800 | -0.51994900 | 1.82145000  |
| H  | 4.63172800  | -0.52212300 | 2.42165700  |
| H  | -0.16030300 | -1.21879900 | 3.30326700  |
| I  | -1.18189700 | 2.32608800  | 0.07702900  |
| Cl | -2.20291900 | 4.44883300  | -0.76553300 |

Table S58. Calculated Gibbs free energy and XYZ coordinates for all atoms in **2a-exo** catalysed by ICl.

$G = -1637.8721$  Hartree

|   |             |             |             |
|---|-------------|-------------|-------------|
| C | -3.09459400 | -1.94996300 | 0.31800800  |
| C | -2.33934000 | -2.36119800 | -0.80663700 |
| C | -2.89574500 | -3.30037400 | -1.68675600 |
| C | -4.16485700 | -3.79177600 | -1.43100300 |
| C | -4.89761200 | -3.36445900 | -0.30998000 |
| C | -4.37395500 | -2.43872800 | 0.57873100  |
| C | -1.12919600 | -0.84333400 | 0.36077000  |
| C | -1.09396500 | -1.64881800 | -0.75616100 |
| H | -2.33961500 | -3.63283200 | -2.55581700 |
| H | -4.60529500 | -4.51608800 | -2.10566000 |
| H | -5.88972300 | -3.76411900 | -0.13813800 |
| H | -4.93640000 | -2.10451000 | 1.44240900  |
| H | -0.29078400 | -1.70268500 | -1.47512900 |
| C | -0.10400100 | 0.03453300  | 0.89903400  |
| H | -0.30615200 | 0.60406000  | 1.79868300  |
| C | 1.17847900  | 0.18533000  | 0.13559000  |
| H | 0.96882200  | 0.27954700  | -0.93221600 |
| H | 1.71337900  | 1.08632900  | 0.43887500  |
| N | -2.32716800 | -1.04509100 | 1.01808800  |
| C | 4.50945100  | -0.60565500 | 0.28689400  |

|    |             |             |             |
|----|-------------|-------------|-------------|
| C  | 3.42730400  | -0.83840600 | -0.56771100 |
| C  | 3.61668900  | -0.81395100 | -1.93903300 |
| C  | 4.89539800  | -0.55650900 | -2.43416300 |
| C  | 5.96161700  | -0.32487800 | -1.56481600 |
| C  | 5.78782200  | -0.34514700 | -0.18291800 |
| C  | 2.74180200  | -0.99889900 | 1.65869300  |
| C  | 2.19787500  | -1.03444700 | 0.26939400  |
| H  | 2.78855900  | -0.98996100 | -2.61623300 |
| H  | 5.06264100  | -0.53406800 | -3.50352500 |
| H  | 6.94614500  | -0.12520200 | -1.96970900 |
| H  | 6.61393100  | -0.16735100 | 0.49402800  |
| H  | 1.64347000  | -1.94986900 | 0.04014600  |
| C  | 1.90790400  | -1.03141500 | 2.75880900  |
| H  | 2.24081700  | -0.66114000 | 3.72083000  |
| C  | 0.57084200  | -1.33757900 | 2.51094400  |
| H  | 0.31682100  | -2.08549100 | 1.76988400  |
| N  | 4.05804800  | -0.69698200 | 1.60913800  |
| H  | -2.63550800 | -0.51994900 | 1.82145000  |
| H  | 4.63172800  | -0.52212300 | 2.42165700  |
| H  | -0.16030300 | -1.21879900 | 3.30326700  |
| I  | -1.18189700 | 2.32608800  | 0.07702900  |
| Cl | -2.20291900 | 4.44883300  | -0.76553300 |

Table S59. Calculated Gibbs free energy and XYZ coordinates for all atoms in **COM1b-endo** catalysed by ICl.

$G = -1637.8529$  Hartree

|   |             |             |             |
|---|-------------|-------------|-------------|
| C | -3.09459400 | -1.94996300 | 0.31800800  |
| C | -2.33934000 | -2.36119800 | -0.80663700 |
| C | -2.89574500 | -3.30037400 | -1.68675600 |
| C | -4.16485700 | -3.79177600 | -1.43100300 |
| C | -4.89761200 | -3.36445900 | -0.30998000 |
| C | -4.37395500 | -2.43872800 | 0.57873100  |
| C | -1.12919600 | -0.84333400 | 0.36077000  |
| C | -1.09396500 | -1.64881800 | -0.75616100 |
| H | -2.33961500 | -3.63283200 | -2.55581700 |
| H | -4.60529500 | -4.51608800 | -2.10566000 |
| H | -5.88972300 | -3.76411900 | -0.13813800 |
| H | -4.93640000 | -2.10451000 | 1.44240900  |
| H | -0.29078400 | -1.70268500 | -1.47512900 |
| C | -0.10400100 | 0.03453300  | 0.89903400  |
| H | -0.30615200 | 0.60406000  | 1.79868300  |
| C | 1.17847900  | 0.18533000  | 0.13559000  |
| H | 0.96882200  | 0.27954700  | -0.93221600 |

|    |             |             |             |
|----|-------------|-------------|-------------|
| H  | 1.71337900  | 1.08632900  | 0.43887500  |
| N  | -2.32716800 | -1.04509100 | 1.01808800  |
| C  | 4.50945100  | -0.60565500 | 0.28689400  |
| C  | 3.42730400  | -0.83840600 | -0.56771100 |
| C  | 3.61668900  | -0.81395100 | -1.93903300 |
| C  | 4.89539800  | -0.55650900 | -2.43416300 |
| C  | 5.96161700  | -0.32487800 | -1.56481600 |
| C  | 5.78782200  | -0.34514700 | -0.18291800 |
| C  | 2.74180200  | -0.99889900 | 1.65869300  |
| C  | 2.19787500  | -1.03444700 | 0.26939400  |
| H  | 2.78855900  | -0.98996100 | -2.61623300 |
| H  | 5.06264100  | -0.53406800 | -3.50352500 |
| H  | 6.94614500  | -0.12520200 | -1.96970900 |
| H  | 6.61393100  | -0.16735100 | 0.49402800  |
| H  | 1.64347000  | -1.94986900 | 0.04014600  |
| C  | 1.90790400  | -1.03141500 | 2.75880900  |
| H  | 2.24081700  | -0.66114000 | 3.72083000  |
| C  | 0.57084200  | -1.33757900 | 2.51094400  |
| H  | 0.31682100  | -2.08549100 | 1.76988400  |
| N  | 4.05804800  | -0.69698200 | 1.60913800  |
| H  | -2.63550800 | -0.51994900 | 1.82145000  |
| H  | 4.63172800  | -0.52212300 | 2.42165700  |
| H  | -0.16030300 | -1.21879900 | 3.30326700  |
| I  | -1.18189700 | 2.32608800  | 0.07702900  |
| Cl | -2.20291900 | 4.44883300  | -0.76553300 |

Table S60. Calculated Gibbs free energy and XYZ coordinates for all atoms in **TS1b-endo** catalysed by ICl.

|   | $G = -1637.8241$ Hartree | Frequency = $-411.27$ $\text{cm}^{-1}$ |             |
|---|--------------------------|----------------------------------------|-------------|
| C | 2.98013800               | -1.62884000                            | -0.58458400 |
| C | 2.41280500               | -1.01582600                            | 0.53770700  |
| C | 3.12581400               | -0.95925000                            | 1.72477200  |
| C | 4.39686800               | -1.53102700                            | 1.76700300  |
| C | 4.94883700               | -2.13056800                            | 0.63459000  |
| C | 4.24807700               | -2.18704100                            | -0.56878400 |
| C | 0.88184800               | -1.01771000                            | -1.22986500 |
| C | 1.09117300               | -0.46478200                            | 0.13645000  |
| H | 2.70782800               | -0.47028400                            | 2.59700100  |
| H | 4.96703700               | -1.50155100                            | 2.68691800  |
| H | 5.94178400               | -2.55966200                            | 0.68763400  |
| H | 4.67547900               | -2.64957800                            | -1.44964600 |

|    |             |             |             |
|----|-------------|-------------|-------------|
| H  | 0.26250200  | -0.60516000 | 0.82198700  |
| C  | -0.27324600 | -0.99147700 | -1.99786300 |
| H  | -0.24658300 | -1.45323300 | -2.97830800 |
| C  | -1.45895200 | -0.39366800 | -1.54550600 |
| H  | -2.18915700 | -0.11753400 | -2.29702600 |
| H  | -1.41218500 | 0.29864900  | -0.70965700 |
| N  | 2.05008400  | -1.56902600 | -1.62987300 |
| C  | -3.70599200 | -0.49335000 | 1.03204700  |
| C  | -3.86679300 | -0.78791200 | -0.33155300 |
| C  | -4.88186800 | -0.15853800 | -1.05369300 |
| C  | -5.71142500 | 0.73051100  | -0.38826700 |
| C  | -5.53173200 | 1.01019700  | 0.97571300  |
| C  | -4.52345500 | 0.40639700  | 1.70986000  |
| C  | -2.12031000 | -2.01073100 | 0.50693400  |
| C  | -2.78153000 | -1.68275800 | -0.70887100 |
| H  | -5.02031200 | -0.36465400 | -2.10849600 |
| H  | -6.51062000 | 1.22320100  | -0.92759200 |
| H  | -6.19248600 | 1.71536800  | 1.46406900  |
| H  | -4.37700200 | 0.62533000  | 2.75990500  |
| H  | -2.83007400 | -2.36918800 | -1.54145900 |
| C  | -1.02250100 | -2.91808900 | 0.71608500  |
| H  | -0.61174700 | -2.98021400 | 1.71931500  |
| C  | -0.47529500 | -3.62352300 | -0.28189500 |
| H  | -0.87866700 | -3.60002100 | -1.28667000 |
| N  | -2.63539700 | -1.24898000 | 1.49864200  |
| H  | -2.28876200 | -1.23228800 | 2.44817900  |
| H  | 2.19201700  | -1.97558500 | -2.54338400 |
| H  | 0.38147700  | -4.26137300 | -0.10338900 |
| I  | 1.24271500  | 1.77190200  | -0.03736900 |
| Cl | 1.36870700  | 4.65770300  | -0.15540600 |

Table S61. Calculated Gibbs free energy and XYZ coordinates for all atoms in **INT1b-endo** catalysed by ICl.

$G = -1637.8346$  Hartree

|   |             |             |             |
|---|-------------|-------------|-------------|
| C | -2.97429900 | -1.72280900 | 0.67907300  |
| C | -2.48065600 | -1.09414800 | -0.47172000 |
| C | -3.22125800 | -1.09848400 | -1.64037000 |
| C | -4.45471500 | -1.75240100 | -1.65339800 |
| C | -4.93435100 | -2.37255700 | -0.50142600 |
| C | -4.20363300 | -2.36631700 | 0.68679800  |
| C | -0.87433900 | -1.00732500 | 1.24484200  |
| C | -1.17286900 | -0.45777300 | -0.12729200 |
| H | -2.85350000 | -0.59191600 | -2.52571800 |

|    |             |             |             |
|----|-------------|-------------|-------------|
| H  | -5.04614100 | -1.76960100 | -2.55996800 |
| H  | -5.89719300 | -2.86885000 | -0.52403600 |
| H  | -4.58194300 | -2.84568900 | 1.58129800  |
| H  | -0.37346700 | -0.61790100 | -0.84607500 |
| C  | 0.30517000  | -1.00614800 | 1.89347600  |
| H  | 0.36403600  | -1.47113700 | 2.87296800  |
| C  | 1.53240200  | -0.36287500 | 1.35788800  |
| H  | 2.04577600  | 0.18556800  | 2.15012600  |
| H  | 1.31000200  | 0.36133100  | 0.57116100  |
| N  | -2.05169100 | -1.57184600 | 1.71014500  |
| C  | 3.99961100  | -0.54707200 | -0.94465700 |
| C  | 3.87384200  | -0.56783600 | 0.44117300  |
| C  | 4.76320300  | 0.15954200  | 1.21444600  |
| C  | 5.76885600  | 0.87356700  | 0.56445900  |
| C  | 5.87276400  | 0.87662500  | -0.82818600 |
| C  | 4.97838400  | 0.16165500  | -1.61861800 |
| C  | 2.23522300  | -1.90943900 | -0.53256600 |
| C  | 2.64660500  | -1.35803100 | 0.79785500  |
| H  | 4.68513600  | 0.17269200  | 2.29496800  |
| H  | 6.48089800  | 1.44155100  | 1.14950900  |
| H  | 6.65952600  | 1.44828400  | -1.30330200 |
| H  | 5.04186100  | 0.16303500  | -2.69898800 |
| H  | 2.81276300  | -2.14210100 | 1.53831700  |
| C  | 1.18035400  | -2.83835400 | -0.82699000 |
| H  | 0.89328900  | -2.95135500 | -1.86680800 |
| C  | 0.57360800  | -3.54431200 | 0.13613000  |
| H  | 0.87860900  | -3.48205200 | 1.17232000  |
| N  | 2.97753100  | -1.36691500 | -1.47294900 |
| H  | 2.85105600  | -1.54383200 | -2.46464700 |
| H  | -2.11627200 | -2.05136100 | 2.59414100  |
| H  | -0.23456700 | -4.22399500 | -0.10594000 |
| I  | -1.37618800 | 1.73699600  | -0.04003800 |
| Cl | -1.58507100 | 4.87675400  | 0.01216500  |

Table S62. Calculated Gibbs free energy and XYZ coordinates for all atoms in **TS2b-endo** catalysed by ICl.

|   |                          |                                        |             |
|---|--------------------------|----------------------------------------|-------------|
|   | $G = -1637.8282$ Hartree | Frequency = $-244.88$ $\text{cm}^{-1}$ |             |
| C | 3.16100300               | -1.60304000                            | -0.61851400 |
| C | 2.67459900               | -0.98541800                            | 0.53901800  |
| C | 3.49255300               | -0.85580600                            | 1.64862000  |
| C | 4.79114900               | -1.36260100                            | 1.58608800  |
| C | 5.26133100               | -1.96954400                            | 0.42250000  |
| C | 4.45227100               | -2.09805600                            | -0.70596300 |
| C | 0.97425800               | -1.12377800                            | -1.06889800 |



|    |             |             |             |
|----|-------------|-------------|-------------|
| C  | 1.28751200  | -0.51007100 | 0.25995600  |
| H  | 3.13314600  | -0.36051000 | 2.54329300  |
| H  | 5.44308200  | -1.27568700 | 2.44602600  |
| H  | 6.27546600  | -2.34865100 | 0.38989200  |
| H  | 4.81684400  | -2.56783200 | -1.61104200 |
| H  | 0.53742200  | -0.71182900 | 1.02225100  |
| C  | -0.25423200 | -1.25744200 | -1.66417200 |
| H  | -0.28134000 | -1.72109900 | -2.64623400 |
| C  | -1.47204500 | -0.52249000 | -1.22620300 |
| H  | -1.85453600 | 0.07518400  | -2.05646200 |
| H  | -1.26227200 | 0.17070600  | -0.41012200 |
| N  | 2.14332600  | -1.61366300 | -1.57678400 |
| C  | -4.09040700 | -0.63433200 | 0.94257600  |
| C  | -3.90148500 | -0.60015200 | -0.43910700 |
| C  | -4.73856800 | 0.17249300  | -1.22625400 |
| C  | -5.75645200 | 0.89412800  | -0.60364400 |
| C  | -5.92536800 | 0.84681200  | 0.78066200  |
| C  | -5.08926900 | 0.07750300  | 1.58544400  |
| C  | -2.34439200 | -2.03027000 | 0.55213800  |
| C  | -2.69888400 | -1.43396900 | -0.77321300 |
| H  | -4.60636400 | 0.21885000  | -2.30084100 |
| H  | -6.42200300 | 1.50419900  | -1.20085100 |
| H  | -6.71948700 | 1.42100000  | 1.24111400  |
| H  | -5.21227400 | 0.04029900  | 2.66014600  |
| H  | -2.87826900 | -2.17954000 | -1.55050700 |
| C  | -1.21694700 | -2.83443100 | 0.75197900  |
| H  | -0.80377300 | -2.94932400 | 1.74695400  |
| C  | -0.55105100 | -3.28618300 | -0.35838100 |
| H  | -1.06672600 | -3.45110000 | -1.29328100 |
| N  | -3.12141200 | -1.49218900 | 1.49490500  |
| H  | -3.00977600 | -1.66061200 | 2.48635300  |
| H  | 2.22331100  | -2.03827100 | -2.48822300 |
| H  | 0.41748000  | -3.76430900 | -0.26211200 |
| I  | 1.28911600  | 1.70407000  | 0.04725200  |
| Cl | 1.26235500  | 4.68962700  | -0.17384400 |

Table S63. Calculated Gibbs free energy and XYZ coordinates for all atoms in **2b-endo** catalysed by ICl.

$G = -1637.8722$  Hartree

|   |            |             |             |
|---|------------|-------------|-------------|
| C | 2.93669700 | -1.79624000 | -0.27080900 |
| C | 2.36298900 | -1.33672600 | 0.92814200  |
| C | 3.11552100 | -1.37155200 | 2.10544000  |
| C | 4.41036500 | -1.86011000 | 2.04749900  |

|    |             |             |             |
|----|-------------|-------------|-------------|
| C  | 4.96782500  | -2.30306700 | 0.83641800  |
| C  | 4.24194200  | -2.27532700 | -0.34357800 |
| C  | 0.83474300  | -1.12843500 | -0.76211200 |
| C  | 1.03346600  | -0.86079400 | 0.59981500  |
| H  | 2.69439800  | -1.01890200 | 3.03930400  |
| H  | 5.00885500  | -1.89859700 | 2.94927700  |
| H  | 5.98557500  | -2.67310500 | 0.82444000  |
| H  | 4.66804700  | -2.61344800 | -1.27996900 |
| H  | 0.24682900  | -0.63751700 | 1.30399900  |
| C  | -0.39054500 | -1.03545300 | -1.62296400 |
| H  | -0.06372200 | -0.68642800 | -2.60755000 |
| C  | -1.44911800 | -0.05169300 | -1.06478900 |
| H  | -1.42948400 | 0.88154500  | -1.62995600 |
| H  | -1.22645800 | 0.20736700  | -0.02862500 |
| N  | 1.97886600  | -1.65772800 | -1.26551700 |
| C  | -4.40378900 | -0.75628800 | 0.71734200  |
| C  | -3.89554100 | 0.09933600  | -0.27148400 |
| C  | -4.35557300 | 1.39821700  | -0.36898700 |
| C  | -5.32763800 | 1.84603200  | 0.53199500  |
| C  | -5.82202300 | 0.98740400  | 1.50879800  |
| C  | -5.37052400 | -0.32918500 | 1.61736600  |
| C  | -2.81617200 | -1.99524100 | -0.36725800 |
| C  | -2.86571500 | -0.65581500 | -1.07662700 |
| H  | -3.96540900 | 2.06433300  | -1.13095500 |
| H  | -5.69436000 | 2.86281800  | 0.47038800  |
| H  | -6.57368200 | 1.34387100  | 2.20328600  |
| H  | -5.76001800 | -0.99300300 | 2.37962300  |
| H  | -3.19496900 | -0.78918100 | -2.11499300 |
| C  | -1.87047600 | -2.88390800 | -0.68413800 |
| H  | -1.75062300 | -3.83226000 | -0.17648900 |
| C  | -0.96823100 | -2.47936000 | -1.81923600 |
| H  | -1.52375700 | -2.46923200 | -2.76446800 |
| N  | -3.80550800 | -2.00955400 | 0.60741500  |
| H  | -3.86202300 | -2.71479700 | 1.32469700  |
| H  | 2.13066100  | -1.85629200 | -2.24426900 |
| H  | -0.14935600 | -3.18780300 | -1.94761000 |
| I  | 1.57900400  | 1.65993500  | -0.02072300 |
| Cl | 2.19703200  | 4.02554700  | -0.37118100 |

Table S64. Calculated Gibbs free energy and XYZ coordinates for all atoms in **COM1b-exo** catalysed by ICl.

$G = -1637.8528$  Hartree

|   |             |            |             |
|---|-------------|------------|-------------|
| C | -1.44529000 | 2.10645700 | -0.86614100 |
|---|-------------|------------|-------------|

|    |             |             |             |
|----|-------------|-------------|-------------|
| C  | -1.47910700 | 1.59491400  | 0.44248100  |
| C  | -2.24685500 | 2.24529900  | 1.41072300  |
| C  | -2.94750100 | 3.38294800  | 1.04232200  |
| C  | -2.90639200 | 3.87130700  | -0.27395600 |
| C  | -2.15614600 | 3.23785300  | -1.25248000 |
| C  | -0.06805500 | 0.32009700  | -0.83523100 |
| C  | -0.64611600 | 0.40482100  | 0.45559800  |
| H  | -2.29083900 | 1.86735100  | 2.42520100  |
| H  | -3.54395000 | 3.90530300  | 1.78010900  |
| H  | -3.47285100 | 4.75808600  | -0.52965600 |
| H  | -2.12042200 | 3.60745000  | -2.26947100 |
| H  | -0.18136300 | -0.01906100 | 1.33360600  |
| C  | 0.92036200  | -0.60632500 | -1.35951500 |
| H  | 1.25275100  | -0.43159300 | -2.37767300 |
| C  | 1.42646200  | -1.60965600 | -0.64271500 |
| H  | 1.10572700  | -1.80145800 | 0.37529300  |
| H  | 2.18665200  | -2.26427700 | -1.05140000 |
| N  | -0.58197700 | 1.30463400  | -1.60188800 |
| C  | 4.16373300  | -0.00291100 | -0.40139000 |
| C  | 3.74368500  | -0.27134400 | 0.92557000  |
| C  | 4.18696000  | -1.44962400 | 1.55075400  |
| C  | 5.00898200  | -2.31076300 | 0.84986900  |
| C  | 5.41277600  | -2.02261300 | -0.47005200 |
| C  | 5.00000000  | -0.86896000 | -1.11131100 |
| C  | 2.77822300  | 1.65278600  | 0.23986700  |
| C  | 2.87205900  | 0.79501100  | 1.31025800  |
| H  | 3.87892800  | -1.68057100 | 2.56413400  |
| H  | 5.35312500  | -3.22493000 | 1.31834200  |
| H  | 6.05928800  | -2.71875900 | -0.99060200 |
| H  | 5.30649900  | -0.64643100 | -2.12661600 |
| H  | 2.37178200  | 0.91304200  | 2.25898700  |
| C  | 1.99858700  | 2.87113700  | 0.04542500  |
| H  | 2.16114800  | 3.39515000  | -0.89319500 |
| C  | 1.11382600  | 3.35061200  | 0.91840800  |
| H  | 0.91598100  | 2.85131100  | 1.86074900  |
| N  | 3.56953400  | 1.17012600  | -0.78525500 |
| H  | -0.40039900 | 1.40771300  | -2.59082300 |
| H  | 3.68121800  | 1.61448600  | -1.68304900 |
| H  | 0.55086200  | 4.25199300  | 0.71000400  |
| I  | -2.33367000 | -1.45235300 | 0.10881500  |
| Cl | -4.02492200 | -3.31056800 | -0.06129500 |

Table S65. Calculated Gibbs free energy and XYZ coordinates for all atoms in **TS1b-exo** catalysed by ICl.

|   | $G = -1637.8212$ Hartree | Frequency = $-417.86$ cm <sup>-1</sup> |             |
|---|--------------------------|----------------------------------------|-------------|
| C | 2.88024000               | -2.03959700                            | -0.29296800 |
| C | 2.56781400               | -1.16707500                            | 0.75384200  |
| C | 3.45872700               | -1.00892300                            | 1.80389000  |
| C | 4.64680100               | -1.73849000                            | 1.78554600  |
| C | 4.94395300               | -2.59709400                            | 0.72654900  |
| C | 4.06136000               | -2.76163300                            | -0.33912800 |
| C | 0.80606900               | -1.22728600                            | -0.78887100 |
| C | 1.27181000               | -0.51316600                            | 0.43047500  |
| H | 3.24025000               | -0.32393600                            | 2.61472400  |
| H | 5.35285200               | -1.63084900                            | 2.59929500  |
| H | 5.87770600               | -3.14565900                            | 0.72930900  |
| H | 4.28639400               | -3.42527600                            | -1.16460300 |
| H | 0.54109400               | -0.42460400                            | 1.22945300  |
| C | -0.42514100              | -1.13734100                            | -1.42513600 |
| H | -0.60345200              | -1.77316400                            | -2.28316000 |
| C | -1.43262200              | -0.27286100                            | -0.97043900 |
| H | -1.14030800              | 0.57190700                             | -0.35529300 |
| H | -2.25744200              | -0.05646900                            | -1.64126900 |
| N | 1.81141500               | -2.03241900                            | -1.19792400 |
| C | -4.69061600              | -0.29405700                            | 0.04292900  |
| C | -3.52727600              | 0.04829800                             | 0.75200500  |
| C | -3.45578900              | 1.28411100                             | 1.39658400  |
| C | -4.55387300              | 2.12790800                             | 1.32881600  |
| C | -5.70814400              | 1.76332900                             | 0.61772500  |
| C | -5.79566400              | 0.54745000                             | -0.04208700 |
| C | -3.26978600              | -2.03316600                            | -0.16759500 |
| C | -2.56456600              | -1.02134900                            | 0.53542200  |
| H | -2.56333100              | 1.57606400                             | 1.93772800  |
| H | -4.52172900              | 3.08817900                             | 1.82789300  |
| H | -6.54631900              | 2.44784900                             | 0.58014400  |
| H | -6.68051500              | 0.26519700                             | -0.59835300 |
| H | -1.74958400              | -1.24541000                            | 1.20856600  |
| C | -2.80146900              | -3.32823600                            | -0.59094200 |
| H | -3.45979700              | -3.90846400                            | -1.22953900 |
| C | -1.59302600              | -3.79564300                            | -0.25829300 |
| H | -0.93144600              | -3.25217800                            | 0.40538600  |
| N | -4.48909900              | -1.55791600                            | -0.50223700 |
| H | 1.77733800               | -2.58754100                            | -2.04114900 |
| H | -5.15858300              | -2.05449600                            | -1.07359300 |
| H | -1.24908400              | -4.75524000                            | -0.62290100 |
| I | 1.67814300               | 1.63536400                             | -0.14842000 |

|    |            |            |             |
|----|------------|------------|-------------|
| Cl | 2.15737500 | 4.35771100 | -0.83207100 |
|----|------------|------------|-------------|

Table S66. Calculated Gibbs free energy and XYZ coordinates for all atoms in **INT1b-exo** catalysed by ICl.

|   |                          |             |             |
|---|--------------------------|-------------|-------------|
|   | $G = -1637.8329$ Hartree |             |             |
| C | -3.71495000              | -1.11294300 | 0.49972100  |
| C | -3.12857600              | -0.28747500 | -0.46498900 |
| C | -3.91552600              | 0.38768600  | -1.37998100 |
| C | -5.30146300              | 0.22800400  | -1.32346700 |
| C | -5.87446800              | -0.59184300 | -0.35351600 |
| C | -5.09161900              | -1.27741400 | 0.57485000  |
| C | -1.45168700              | -1.24197900 | 0.91973500  |
| C | -1.64231500              | -0.32121800 | -0.27493300 |
| H | -3.46189500              | 1.04271100  | -2.11561600 |
| H | -5.93365600              | 0.75161700  | -2.02910500 |
| H | -6.95187400              | -0.69967200 | -0.31414000 |
| H | -5.54125800              | -1.91322200 | 1.32753200  |
| H | -1.12593700              | -0.69631500 | -1.15934300 |
| C | -0.31970100              | -1.65005900 | 1.52485000  |
| H | -0.42783000              | -2.38052400 | 2.31953600  |
| C | 1.05475300               | -1.09585500 | 1.30873600  |
| H | 1.06756900               | -0.02257800 | 1.50768500  |
| H | 1.74677200               | -1.54971600 | 2.02137900  |
| N | -2.71937700              | -1.68941700 | 1.27771700  |
| C | 4.04875600               | -1.24204600 | -0.30248500 |
| C | 2.95137800               | -0.39303500 | -0.19928100 |
| C | 3.15235700               | 0.97527000  | -0.11110600 |
| C | 4.46623200               | 1.44348100  | -0.14841200 |
| C | 5.55083400               | 0.57062900  | -0.25696400 |
| C | 5.36176500               | -0.80674900 | -0.33428900 |
| C | 2.24192800               | -2.61421700 | -0.33476100 |
| C | 1.70207400               | -1.23066000 | -0.12315000 |
| H | 2.32782600               | 1.67584700  | -0.01979700 |
| H | 4.64099800               | 2.51063200  | -0.08815500 |
| H | 6.55747500               | 0.96838500  | -0.27935100 |
| H | 6.19300000               | -1.49590900 | -0.41314700 |
| H | 0.96722200               | -0.96524700 | -0.88618700 |
| C | 1.51809400               | -3.85483500 | -0.43861600 |
| H | 2.09081100               | -4.77155400 | -0.34698300 |
| C | 0.20244800               | -3.88918700 | -0.67490800 |
| H | -0.38080700              | -2.98891900 | -0.81342200 |

|    |             |             |             |
|----|-------------|-------------|-------------|
| N  | 3.55183600  | -2.56611500 | -0.36889200 |
| H  | -2.89771700 | -2.16905400 | 2.14609700  |
| H  | 4.14290900  | -3.38622800 | -0.46153500 |
| H  | -0.31784500 | -4.83535100 | -0.75602300 |
| I  | -0.74914100 | 1.65585800  | -0.01200100 |
| Cl | 1.19527200  | 4.17529500  | 0.35251000  |

Table S67. Calculated Gibbs free energy and XYZ coordinates for all atoms in **TS2b-exo** catalysed by ICl.

|   | $G = -1637.8250$ Hartree | Frequency = $-277.57$ $\text{cm}^{-1}$ |             |
|---|--------------------------|----------------------------------------|-------------|
| C | 3.09920100               | -1.85379100                            | -0.38440500 |
| C | 2.70653000               | -1.04191600                            | 0.68454400  |
| C | 3.58221200               | -0.80572400                            | 1.73068900  |
| C | 4.84455300               | -1.39906400                            | 1.69300500  |
| C | 5.22262100               | -2.19817200                            | 0.61502600  |
| C | 4.35379500               | -2.43842200                            | -0.44889000 |
| C | 0.93088300               | -1.28054900                            | -0.83584800 |
| C | 1.33717300               | -0.52769400                            | 0.39255900  |
| H | 3.29532200               | -0.16358000                            | 2.55542100  |
| H | 5.54094600               | -1.22992600                            | 2.50448100  |
| H | 6.21061100               | -2.64181700                            | 0.59946000  |
| H | 4.64611100               | -3.05831400                            | -1.28730200 |
| H | 0.61906400               | -0.57140500                            | 1.20882400  |
| C | -0.32587100              | -1.39854200                            | -1.37899600 |
| H | -0.41313300              | -1.96396300                            | -2.29919000 |
| C | -1.45949100              | -0.50384900                            | -0.99823400 |
| H | -1.10633100              | 0.50683700                             | -0.78842200 |
| H | -2.16861600              | -0.42956700                            | -1.82405900 |
| N | 2.03403700               | -1.94368100                            | -1.28503900 |
| C | -4.64704900              | -0.67694200                            | 0.18151700  |
| C | -3.47562900              | 0.02371800                             | 0.47320500  |
| C | -3.54034100              | 1.36892400                             | 0.79577700  |
| C | -4.79233800              | 1.98232700                             | 0.82794100  |
| C | -5.95169300              | 1.26269200                             | 0.53452400  |
| C | -5.90114800              | -0.08858700                            | 0.20167300  |
| C | -2.98328500              | -2.20974700                            | 0.01264500  |
| C | -2.31384700              | -0.90627600                            | 0.29199100  |
| H | -2.64105800              | 1.93324500                             | 1.01463800  |
| H | -4.86606400              | 3.03251100                             | 1.07988600  |
| H | -6.91139000              | 1.76336700                             | 0.56383500  |
| H | -6.79745100              | -0.65008500                            | -0.02946100 |
| H | -1.64206800              | -0.94393900                            | 1.15232000  |
| C | -2.26806200              | -3.37087800                            | -0.30285200 |

|    |             |             |             |
|----|-------------|-------------|-------------|
| H  | -2.74166600 | -4.16339500 | -0.86941500 |
| C  | -0.91682400 | -3.36060400 | -0.07403300 |
| H  | -0.49374000 | -2.75811300 | 0.71672900  |
| N  | -4.29825700 | -2.00954100 | -0.10731300 |
| H  | 2.05213100  | -2.48486600 | -2.13652400 |
| H  | -4.95888900 | -2.72591200 | -0.37928800 |
| H  | -0.28363600 | -4.15341300 | -0.45486900 |
| I  | 1.45524700  | 1.65367200  | -0.08407700 |
| Cl | 1.55134900  | 4.54522800  | -0.65856000 |

Table S68. Calculated Gibbs free energy and XYZ coordinates for all atoms in **2b-exo** catalysed by ICl.

$G = -1637.8730$  Hartree

|   |             |             |             |
|---|-------------|-------------|-------------|
| C | 2.83592200  | 0.99689700  | 0.56327100  |
| C | 2.55602000  | 1.42743000  | -0.76092600 |
| C | 3.42113000  | 1.03624200  | -1.79398800 |
| C | 4.51564000  | 0.24560600  | -1.49180900 |
| C | 4.77707600  | -0.16860400 | -0.17233200 |
| C | 3.94632100  | 0.19926900  | 0.87282600  |
| C | 0.94922500  | 2.22939100  | 0.61154100  |
| C | 1.35378100  | 2.20743200  | -0.69706100 |
| H | 3.22866800  | 1.34712500  | -2.81411100 |
| H | 5.18653200  | -0.06495000 | -2.28347900 |
| H | 5.64096100  | -0.78953000 | 0.03013200  |
| H | 4.14416300  | -0.11430500 | 1.89121500  |
| H | 0.82945500  | 2.66802900  | -1.52034200 |
| C | -0.28599200 | 2.79298100  | 1.25075000  |
| H | 0.01433200  | 3.25482800  | 2.19689900  |
| C | -1.27192700 | 1.64198900  | 1.56882900  |
| H | -0.79269200 | 0.89705600  | 2.21027100  |
| H | -2.13628100 | 2.04399900  | 2.10523200  |
| N | 1.84743300  | 1.50768400  | 1.37162800  |
| C | -3.71746700 | 0.27571000  | -0.76374300 |
| C | -2.81398000 | -0.03342800 | 0.26407700  |
| C | -2.97506400 | -1.18191800 | 1.01296300  |
| C | -4.06389200 | -2.02043000 | 0.74531700  |
| C | -4.95745100 | -1.69987700 | -0.27084200 |
| C | -4.79664500 | -0.54836500 | -1.04630200 |
| C | -2.31847400 | 2.07492600  | -0.64480800 |
| C | -1.72825800 | 1.01332500  | 0.25891200  |
| H | -2.26773000 | -1.43147600 | 1.79718300  |
| H | -4.20853600 | -2.92141200 | 1.32833000  |
| H | -5.79745600 | -2.35488800 | -0.47060100 |

|    |             |             |             |
|----|-------------|-------------|-------------|
| H  | -5.49379500 | -0.30818000 | -1.84011900 |
| H  | -0.85210600 | 0.58385700  | -0.24503500 |
| C  | -1.95914900 | 3.35801900  | -0.61537900 |
| H  | -2.45334100 | 4.08130900  | -1.25654200 |
| C  | -0.94936000 | 3.87953500  | 0.37946300  |
| H  | -0.16642900 | 4.45399300  | -0.12588200 |
| N  | -3.32839800 | 1.46038300  | -1.40196100 |
| H  | 1.78785900  | 1.38081600  | 2.37039300  |
| H  | -4.01245500 | 2.02627400  | -1.88244500 |
| H  | -1.45716600 | 4.58886700  | 1.04243500  |
| I  | 1.28615800  | -1.66146200 | 0.09624200  |
| Cl | -0.24107800 | -3.43630400 | -0.17920900 |

Table S69. Calculated Gibbs free energy and XYZ coordinates for all atoms in **COM1c-endo** catalysed by ICl.

$G = -1868.7955$  Hartree

|   |             |             |             |
|---|-------------|-------------|-------------|
| I | 2.72105600  | -2.19396600 | -0.58617200 |
| C | -2.22277400 | -1.17712600 | 1.55920500  |
| C | -1.21273500 | -0.67216400 | 2.41666100  |
| C | -1.48970800 | -0.53491100 | 3.78972200  |
| C | -2.74159100 | -0.88125500 | 4.25343100  |
| C | -3.73522900 | -1.37312500 | 3.37896900  |
| C | -3.49351900 | -1.53070800 | 2.02875500  |
| C | -0.41228800 | -0.73716500 | 0.30812700  |
| C | -0.07174400 | -0.40449200 | 1.59964100  |
| H | -0.72986600 | -0.16257200 | 4.46697000  |
| H | -2.97181100 | -0.77882600 | 5.30685600  |
| H | -4.70690500 | -1.63660100 | 3.77890500  |
| H | -4.25046300 | -1.91483900 | 1.35572300  |
| H | 0.89196100  | -0.03848600 | 1.92149200  |
| C | 0.33058500  | -0.58865700 | -0.93031900 |
| H | -0.07460800 | -1.09482200 | -1.80342300 |
| C | 1.42775300  | 0.19085000  | -1.06885900 |
| H | 1.88496700  | 0.33234300  | -2.03973300 |
| H | 1.80485100  | 0.79081900  | -0.24653200 |
| N | -1.69976800 | -1.23374400 | 0.29498600  |
| C | 1.32645500  | 3.47554000  | 0.73944700  |
| C | 1.42920600  | 3.87035400  | -0.61867100 |
| C | 2.56095200  | 4.59655700  | -1.02942000 |
| C | 3.53838500  | 4.89397700  | -0.10047100 |
| C | 3.41693300  | 4.48546100  | 1.24387700  |
| C | 2.31483400  | 3.77564900  | 1.68232000  |
| C | -0.49637500 | 2.71882400  | -0.34529500 |
| C | 0.26130800  | 3.38374200  | -1.28350600 |



|    |             |             |             |
|----|-------------|-------------|-------------|
| H  | 2.66221600  | 4.91373000  | -2.06096100 |
| H  | 4.41692000  | 5.45011800  | -0.40450100 |
| H  | 4.20295100  | 4.73420400  | 1.94656400  |
| H  | 2.21740000  | 3.46349300  | 2.71530600  |
| H  | 0.00480300  | 3.51596600  | -2.32300600 |
| C  | -1.72788200 | 1.95959200  | -0.46535100 |
| H  | -2.19934600 | 1.66421000  | 0.47050900  |
| C  | -2.23271400 | 1.53412900  | -1.63134600 |
| H  | -1.70118800 | 1.76968400  | -2.55033900 |
| N  | 0.14459600  | 2.79451400  | 0.87651500  |
| H  | -0.17632600 | 2.32947800  | 1.71266700  |
| H  | -2.22947200 | -1.43871100 | -0.54083000 |
| Cl | 4.29294800  | -3.98352500 | -0.15115300 |
| C  | -3.40961000 | 0.66972900  | -1.77507900 |
| C  | -3.55443500 | -0.08672300 | -2.94553400 |
| C  | -4.37318400 | 0.52721800  | -0.76590000 |
| C  | -4.61236900 | -0.97662600 | -3.09611400 |
| H  | -2.82219100 | 0.02155100  | -3.73887100 |
| C  | -5.43081600 | -0.35840000 | -0.91892300 |
| H  | -4.30008700 | 1.11859600  | 0.13974600  |
| C  | -5.55299700 | -1.11850400 | -2.08136100 |
| H  | -4.70284500 | -1.55636400 | -4.00684800 |
| H  | -6.16851700 | -0.45170500 | -0.13039800 |
| H  | -6.38099400 | -1.80712500 | -2.19712800 |

Table S70. Calculated Gibbs free energy and XYZ coordinates for all atoms in **TS1c-endo** catalysed by ICl.

$G = -1868.7708$  Hartree    Frequency =  $-384.71 \text{ cm}^{-1}$

|   |             |             |             |
|---|-------------|-------------|-------------|
| I | 2.13172300  | -2.46625200 | -0.43857900 |
| C | -2.18778900 | -1.01674500 | 1.58087100  |
| C | -1.35189000 | -0.25958700 | 2.43763900  |
| C | -1.82180200 | 0.07776200  | 3.71781000  |
| C | -3.08678200 | -0.33197500 | 4.09622500  |
| C | -3.90177200 | -1.08051200 | 3.22429000  |
| C | -3.46577000 | -1.43481100 | 1.95956500  |
| C | -0.28466700 | -0.56659600 | 0.47153900  |
| C | -0.14519200 | 0.00679000  | 1.71318600  |
| H | -1.19891100 | 0.64832600  | 4.39721200  |
| H | -3.46102200 | -0.07862400 | 5.08075300  |
| H | -4.88738200 | -1.38798100 | 3.55231000  |
| H | -4.08922900 | -2.01065400 | 1.28568100  |
| H | 0.71137900  | 0.56074100  | 2.06530800  |

|    |             |             |             |
|----|-------------|-------------|-------------|
| C  | 0.60767800  | -0.54913800 | -0.68531000 |
| H  | 0.16228300  | -0.84525500 | -1.63099100 |
| C  | 1.68217700  | 0.36214600  | -0.72888200 |
| H  | 2.34288500  | 0.35223500  | -1.58616400 |
| H  | 2.13560000  | 0.68115800  | 0.20381900  |
| N  | -1.50836100 | -1.19575200 | 0.40121200  |
| C  | 1.78342400  | 3.59495700  | 0.55940400  |
| C  | 2.21104300  | 3.12221600  | -0.69724000 |
| C  | 3.53054100  | 3.34730500  | -1.10007200 |
| C  | 4.37378000  | 4.04180200  | -0.24765800 |
| C  | 3.92659300  | 4.50281600  | 1.00182600  |
| C  | 2.62618300  | 4.28469200  | 1.42797100  |
| C  | 0.01629100  | 2.55932400  | -0.38765500 |
| C  | 1.10392600  | 2.38568700  | -1.26905900 |
| H  | 3.88282400  | 2.98852500  | -2.06000700 |
| H  | 5.39745300  | 4.23216100  | -0.54516500 |
| H  | 4.61257200  | 5.03842100  | 1.64620200  |
| H  | 2.27948600  | 4.63577200  | 2.39201400  |
| H  | 0.99369100  | 2.13775000  | -2.31350900 |
| C  | -1.34292100 | 2.09517600  | -0.50550500 |
| H  | -1.96299900 | 2.18881000  | 0.38097300  |
| C  | -1.81913000 | 1.52720500  | -1.62704000 |
| H  | -1.17762400 | 1.48749200  | -2.50404000 |
| N  | 0.45259700  | 3.23706000  | 0.70561400  |
| H  | -0.11250400 | 3.41734000  | 1.52345200  |
| H  | -1.87418000 | -1.65640700 | -0.41817700 |
| Cl | 3.47258900  | -4.67634000 | -0.17076100 |
| C  | -3.14863100 | 0.93925400  | -1.79833800 |
| C  | -3.55110300 | 0.54498000  | -3.08042600 |
| C  | -4.02886400 | 0.73295000  | -0.72553900 |
| C  | -4.80061000 | -0.02559400 | -3.29160700 |
| H  | -2.87627500 | 0.69323800  | -3.91672000 |
| C  | -5.27424700 | 0.16200800  | -0.93699600 |
| H  | -3.73344200 | 0.99470500  | 0.28388900  |
| C  | -5.66634800 | -0.21763100 | -2.22057100 |
| H  | -5.09608400 | -0.32189100 | -4.29068100 |
| H  | -5.93891800 | 0.00326700  | -0.09600200 |
| H  | -6.63927000 | -0.66605000 | -2.38089000 |

Table S71. Calculated Gibbs free energy and XYZ coordinates for all atoms in **INT1c-endo** catalysed by ICl.

$G = -1868.8012$  Hartree

|   |            |             |             |
|---|------------|-------------|-------------|
| I | 2.13172300 | -2.46625200 | -0.43857900 |
|---|------------|-------------|-------------|

|    |             |             |             |
|----|-------------|-------------|-------------|
| C  | -2.18778900 | -1.01674500 | 1.58087100  |
| C  | -1.35189000 | -0.25958700 | 2.43763900  |
| C  | -1.82180200 | 0.07776200  | 3.71781000  |
| C  | -3.08678200 | -0.33197500 | 4.09622500  |
| C  | -3.90177200 | -1.08051200 | 3.22429000  |
| C  | -3.46577000 | -1.43481100 | 1.95956500  |
| C  | -0.28466700 | -0.56659600 | 0.47153900  |
| C  | -0.14519200 | 0.00679000  | 1.71318600  |
| H  | -1.19891100 | 0.64832600  | 4.39721200  |
| H  | -3.46102200 | -0.07862400 | 5.08075300  |
| H  | -4.88738200 | -1.38798100 | 3.55231000  |
| H  | -4.08922900 | -2.01065400 | 1.28568100  |
| H  | 0.71137900  | 0.56074100  | 2.06530800  |
| C  | 0.60767800  | -0.54913800 | -0.68531000 |
| H  | 0.16228300  | -0.84525500 | -1.63099100 |
| C  | 1.68217700  | 0.36214600  | -0.72888200 |
| H  | 2.34288500  | 0.35223500  | -1.58616400 |
| H  | 2.13560000  | 0.68115800  | 0.20381900  |
| N  | -1.50836100 | -1.19575200 | 0.40121200  |
| C  | 1.78342400  | 3.59495700  | 0.55940400  |
| C  | 2.21104300  | 3.12221600  | -0.69724000 |
| C  | 3.53054100  | 3.34730500  | -1.10007200 |
| C  | 4.37378000  | 4.04180200  | -0.24765800 |
| C  | 3.92659300  | 4.50281600  | 1.00182600  |
| C  | 2.62618300  | 4.28469200  | 1.42797100  |
| C  | 0.01629100  | 2.55932400  | -0.38765500 |
| C  | 1.10392600  | 2.38568700  | -1.26905900 |
| H  | 3.88282400  | 2.98852500  | -2.06000700 |
| H  | 5.39745300  | 4.23216100  | -0.54516500 |
| H  | 4.61257200  | 5.03842100  | 1.64620200  |
| H  | 2.27948600  | 4.63577200  | 2.39201400  |
| H  | 0.99369100  | 2.13775000  | -2.31350900 |
| C  | -1.34292100 | 2.09517600  | -0.50550500 |
| H  | -1.96299900 | 2.18881000  | 0.38097300  |
| C  | -1.81913000 | 1.52720500  | -1.62704000 |
| H  | -1.17762400 | 1.48749200  | -2.50404000 |
| N  | 0.45259700  | 3.23706000  | 0.70561400  |
| H  | -0.11250400 | 3.41734000  | 1.52345200  |
| H  | -1.87418000 | -1.65640700 | -0.41817700 |
| Cl | 3.47258900  | -4.67634000 | -0.17076100 |
| C  | -3.14863100 | 0.93925400  | -1.79833800 |
| C  | -3.55110300 | 0.54498000  | -3.08042600 |
| C  | -4.02886400 | 0.73295000  | -0.72553900 |
| C  | -4.80061000 | -0.02559400 | -3.29160700 |

|   |             |             |             |
|---|-------------|-------------|-------------|
| H | -2.87627500 | 0.69323800  | -3.91672000 |
| C | -5.27424700 | 0.16200800  | -0.93699600 |
| H | -3.73344200 | 0.99470500  | 0.28388900  |
| C | -5.66634800 | -0.21763100 | -2.22057100 |
| H | -5.09608400 | -0.32189100 | -4.29068100 |
| H | -5.93891800 | 0.00326700  | -0.09600200 |
| H | -6.63927000 | -0.66605000 | -2.38089000 |

Table S72. Calculated Gibbs free energy and XYZ coordinates for all atoms in **TS2c-endo** catalysed by ICl.

|   | $G = -1868.7579$ Hartree | Frequency = $-467.85$ $\text{cm}^{-1}$ |             |
|---|--------------------------|----------------------------------------|-------------|
| I | 0.41131700               | 2.91703400                             | -0.19757200 |
| C | 2.57161100               | -0.73057800                            | 1.47406900  |
| C | 1.48762900               | -1.16664800                            | 2.27751300  |
| C | 1.76715400               | -1.80565800                            | 3.49485300  |
| C | 3.08713100               | -2.00022300                            | 3.86692900  |
| C | 4.14485200               | -1.56829300                            | 3.04771700  |
| C | 3.90171600               | -0.92882200                            | 1.84131800  |
| C | 0.65738900               | -0.20698900                            | 0.39946100  |
| C | 0.28434000               | -0.82295400                            | 1.57762100  |
| H | 0.95891900               | -2.14422200                            | 4.13337000  |
| H | 3.31243300               | -2.49294000                            | 4.80531800  |
| H | 5.16715400               | -1.73569400                            | 3.36488200  |
| H | 4.71335000               | -0.59286600                            | 1.20638900  |
| H | -0.72861100              | -1.00227700                            | 1.90364600  |
| C | -0.16682500              | 0.25481900                             | -0.69691300 |
| H | 0.31361300               | 0.63345500                             | -1.59168600 |
| C | -1.64315300              | 0.43386100                             | -0.48312700 |
| H | -1.99819300              | 1.35188200                             | -0.95150500 |
| H | -1.84732900              | 0.52308100                             | 0.58594000  |
| N | 2.03806000               | -0.14580100                            | 0.35138000  |
| C | -4.16047200              | -1.76567700                            | 0.37785000  |
| C | -3.98040500              | -0.62241100                            | -0.40899000 |
| C | -4.96312500              | 0.35149200                             | -0.44509700 |
| C | -6.12252800              | 0.16324600                             | 0.30888900  |
| C | -6.28363000              | -0.98186400                            | 1.08814700  |
| C | -5.30250900              | -1.96997300                            | 1.13806000  |
| C | -2.14070100              | -2.04660100                            | -0.62956700 |
| C | -2.62201400              | -0.69775500                            | -1.04449300 |
| H | -4.83607200              | 1.24360300                             | -1.04787300 |
| H | -6.90343900              | 0.91282800                             | 0.29055600  |
| H | -7.18952100              | -1.10941300                            | 1.66814300  |
| H | -5.42810600              | -2.85898000                            | 1.74329800  |

|    |             |             |             |
|----|-------------|-------------|-------------|
| H  | -2.64732600 | -0.58907500 | -2.13071400 |
| C  | -0.90199000 | -2.51867200 | -0.98365100 |
| H  | -0.48497100 | -3.38994600 | -0.49479300 |
| C  | -0.12958300 | -1.71449900 | -1.84124400 |
| H  | -0.64272500 | -1.16219700 | -2.62067000 |
| N  | -3.03861500 | -2.58783000 | 0.23298300  |
| H  | -2.90432800 | -3.46364100 | 0.71650800  |
| H  | 2.56747200  | 0.19715700  | -0.43584600 |
| Cl | 0.89064300  | 5.29079400  | 0.26168100  |
| C  | 1.28793400  | -1.96649600 | -2.09295500 |
| C  | 1.90475700  | -1.39114700 | -3.21263800 |
| C  | 2.07252700  | -2.70419600 | -1.19610700 |
| C  | 3.26399500  | -1.55901900 | -3.43820100 |
| H  | 1.30738400  | -0.80673600 | -3.90517500 |
| C  | 3.43127000  | -2.87306200 | -1.42270800 |
| H  | 1.63001900  | -3.10324600 | -0.29006700 |
| C  | 4.03076000  | -2.30274900 | -2.54330400 |
| H  | 3.72677500  | -1.11039300 | -4.30877500 |
| H  | 4.02734700  | -3.43470700 | -0.71357200 |
| H  | 5.09254000  | -2.43136200 | -2.71579300 |

Table S73. Calculated Gibbs free energy and XYZ coordinates for all atoms in **2c-endo** catalysed by ICl.

$G = -1868.8108$  Hartree

|   |             |             |             |
|---|-------------|-------------|-------------|
| I | 0.24505400  | 2.66754700  | -0.17247200 |
| C | 3.03686000  | 0.22683200  | 0.00026700  |
| C | 2.29490700  | 0.58130000  | 1.14191600  |
| C | 2.95903800  | 1.11446000  | 2.25067600  |
| C | 4.33429500  | 1.26610800  | 2.18703500  |
| C | 5.05503200  | 0.90927600  | 1.03431900  |
| C | 4.41758700  | 0.38952200  | -0.08022400 |
| C | 0.88555000  | -0.28902000 | -0.43346600 |
| C | 0.90312400  | 0.31077900  | 0.83593300  |
| H | 2.40766400  | 1.40138400  | 3.13815600  |
| H | 4.86783600  | 1.66945000  | 3.03893900  |
| H | 6.12949500  | 1.04404300  | 1.01733100  |
| H | 4.96643900  | 0.11159000  | -0.97167500 |
| H | 0.08968100  | 0.25303500  | 1.54420900  |
| C | -0.20929400 | -1.02896400 | -1.13806100 |
| H | 0.02638900  | -1.01919100 | -2.20648700 |
| C | -1.59693400 | -0.38534300 | -0.91624100 |

|    |             |             |             |
|----|-------------|-------------|-------------|
| H  | -1.83039700 | 0.29048300  | -1.74103300 |
| H  | -1.59512700 | 0.21572300  | -0.00532600 |
| N  | 2.14345900  | -0.27536500 | -0.93255500 |
| C  | -4.37552300 | -1.50645600 | 0.92543100  |
| C  | -4.04318000 | -0.90928100 | -0.29916800 |
| C  | -4.90350500 | -0.00108400 | -0.88507600 |
| C  | -6.10281000 | 0.31483200  | -0.23809800 |
| C  | -6.41960100 | -0.28454800 | 0.97702100  |
| C  | -5.56266600 | -1.20757800 | 1.57917200  |
| C  | -2.30214800 | -2.32623900 | 0.41952300  |
| C  | -2.70179400 | -1.44011700 | -0.74277400 |
| H  | -4.65096900 | 0.46477100  | -1.83148900 |
| H  | -6.78476800 | 1.02862500  | -0.68248100 |
| H  | -7.35034300 | -0.03173900 | 1.47105400  |
| H  | -5.81493200 | -1.67127500 | 2.52497800  |
| H  | -2.79467700 | -2.03199800 | -1.66252400 |
| C  | -1.06408200 | -2.82499800 | 0.48981900  |
| H  | -0.71613900 | -3.43214200 | 1.31581600  |
| C  | -0.18837100 | -2.56951500 | -0.70989900 |
| H  | -0.62767400 | -3.07817700 | -1.57728300 |
| N  | -3.36733700 | -2.39115300 | 1.30497400  |
| H  | -3.29313500 | -2.78418200 | 2.22975200  |
| H  | 2.40119700  | -0.67427800 | -1.82449500 |
| Cl | -0.28791100 | 4.96581500  | -0.91161800 |
| C  | 1.22970400  | -3.07256200 | -0.57176400 |
| C  | 1.91249000  | -3.53005300 | -1.69945700 |
| C  | 1.91970800  | -2.98374800 | 0.63921100  |
| C  | 3.26041900  | -3.87064500 | -1.62777700 |
| H  | 1.38406300  | -3.61249200 | -2.64452800 |
| C  | 3.26649900  | -3.32073000 | 0.71416300  |
| H  | 1.40953200  | -2.61595100 | 1.52307900  |
| C  | 3.94301600  | -3.76004200 | -0.42033700 |
| H  | 3.77536700  | -4.22437400 | -2.51326900 |
| H  | 3.79104200  | -3.23047100 | 1.65818500  |
| H  | 4.99329700  | -4.01918300 | -0.36219200 |

Table S74. Calculated Gibbs free energy and XYZ coordinates for all atoms in **COM1c-exo** catalysed by ICl.

$G = -1868.7947$  Hartree

|   |             |             |            |
|---|-------------|-------------|------------|
| C | -1.76583900 | -1.96566200 | 0.18410300 |
|---|-------------|-------------|------------|

|    |             |             |             |
|----|-------------|-------------|-------------|
| C  | -1.51106500 | -1.60433100 | 1.53189300  |
| C  | -2.34187500 | -2.11963600 | 2.54478100  |
| C  | -3.36662800 | -2.97454200 | 2.19397100  |
| C  | -3.58999400 | -3.33312800 | 0.84619800  |
| C  | -2.80200800 | -2.83651800 | -0.17192700 |
| C  | 0.01477500  | -0.59858400 | 0.21077300  |
| C  | -0.37656400 | -0.73860900 | 1.52306000  |
| H  | -2.16930300 | -1.85453800 | 3.58135000  |
| H  | -4.01025700 | -3.38576700 | 2.96214100  |
| H  | -4.40250400 | -4.00864100 | 0.60691700  |
| H  | -2.98032000 | -3.10257000 | -1.20664000 |
| H  | 0.08373800  | -0.25815700 | 2.37254200  |
| C  | 1.11595300  | 0.14774700  | -0.36252300 |
| H  | 1.07240000  | 0.34294400  | -1.43104400 |
| C  | 2.15767000  | 0.64766700  | 0.35339900  |
| H  | 2.20543700  | 0.52574500  | 1.42958300  |
| H  | 2.87855000  | 1.31330800  | -0.10519700 |
| N  | -0.83569900 | -1.33156800 | -0.59360500 |
| C  | 1.30360800  | 3.65109700  | -0.38091200 |
| C  | 1.02005800  | 3.44359900  | 0.99331500  |
| C  | 2.01329100  | 3.74396800  | 1.94176900  |
| C  | 3.23489000  | 4.21928900  | 1.50510200  |
| C  | 3.49316600  | 4.41714400  | 0.13311300  |
| C  | 2.53474200  | 4.14134900  | -0.82548500 |
| C  | -0.76754600 | 2.77838500  | -0.21872000 |
| C  | -0.29963000 | 2.90162300  | 1.06922000  |
| H  | 1.82359600  | 3.59324900  | 2.99845200  |
| H  | 4.01110800  | 4.44772000  | 2.22539100  |
| H  | 4.46092100  | 4.79366300  | -0.17537600 |
| H  | 2.73156100  | 4.29089100  | -1.88051200 |
| H  | -0.84314200 | 2.63311700  | 1.96161200  |
| C  | -2.02247900 | 2.25345400  | -0.73146800 |
| H  | -2.28732300 | 2.54672200  | -1.74397800 |
| C  | -2.82216700 | 1.43951700  | -0.02839800 |
| H  | -2.48908400 | 1.11267100  | 0.95452700  |
| N  | 0.20129600  | 3.24801200  | -1.08837200 |
| H  | -0.75088000 | -1.42142900 | -1.59455400 |
| H  | 0.11232600  | 3.26817300  | -2.09237000 |
| I  | 3.29443400  | -1.63058500 | -0.41850500 |
| Cl | 4.75133400  | -3.56785500 | -0.80679300 |
| C  | -4.11625800 | 0.90212400  | -0.46351500 |
| C  | -4.79093400 | 1.35709600  | -1.60603800 |
| C  | -4.70746700 | -0.11094200 | 0.29926700  |
| C  | -6.00602300 | 0.80086600  | -1.97750700 |

|   |             |             |             |
|---|-------------|-------------|-------------|
| H | -4.37322500 | 2.16180400  | -2.19992400 |
| C | -5.92521600 | -0.66797200 | -0.07289900 |
| H | -4.19491600 | -0.47571000 | 1.18404400  |
| C | -6.57858400 | -0.21586100 | -1.21360200 |
| H | -6.51568700 | 1.16613100  | -2.86127500 |
| H | -6.35792700 | -1.45908400 | 0.52847800  |
| H | -7.52916900 | -0.64565100 | -1.50591400 |

Table S75. Calculated Gibbs free energy and XYZ coordinates for all atoms in **TS1c-exo** catalysed by ICl.

|   | $G = -1868.7717$ Hartree | Frequency = $-378.05$ cm <sup>-1</sup> |             |
|---|--------------------------|----------------------------------------|-------------|
| C | -1.76583900              | -1.96566200                            | 0.18410300  |
| C | -1.51106500              | -1.60433100                            | 1.53189300  |
| C | -2.34187500              | -2.11963600                            | 2.54478100  |
| C | -3.36662800              | -2.97454200                            | 2.19397100  |
| C | -3.58999400              | -3.33312800                            | 0.84619800  |
| C | -2.80200800              | -2.83651800                            | -0.17192700 |
| C | 0.01477500               | -0.59858400                            | 0.21077300  |
| C | -0.37656400              | -0.73860900                            | 1.52306000  |
| H | -2.16930300              | -1.85453800                            | 3.58135000  |
| H | -4.01025700              | -3.38576700                            | 2.96214100  |
| H | -4.40250400              | -4.00864100                            | 0.60691700  |
| H | -2.98032000              | -3.10257000                            | -1.20664000 |
| H | 0.08373800               | -0.25815700                            | 2.37254200  |
| C | 1.11595300               | 0.14774700                             | -0.36252300 |
| H | 1.07240000               | 0.34294400                             | -1.43104400 |
| C | 2.15767000               | 0.64766700                             | 0.35339900  |
| H | 2.20543700               | 0.52574500                             | 1.42958300  |
| H | 2.87855000               | 1.31330800                             | -0.10519700 |
| N | -0.83569900              | -1.33156800                            | -0.59360500 |
| C | 1.30360800               | 3.65109700                             | -0.38091200 |
| C | 1.02005800               | 3.44359900                             | 0.99331500  |
| C | 2.01329100               | 3.74396800                             | 1.94176900  |
| C | 3.23489000               | 4.21928900                             | 1.50510200  |
| C | 3.49316600               | 4.41714400                             | 0.13311300  |
| C | 2.53474200               | 4.14134900                             | -0.82548500 |
| C | -0.76754600              | 2.77838500                             | -0.21872000 |
| C | -0.29963000              | 2.90162300                             | 1.06922000  |
| H | 1.82359600               | 3.59324900                             | 2.99845200  |
| H | 4.01110800               | 4.44772000                             | 2.22539100  |
| H | 4.46092100               | 4.79366300                             | -0.17537600 |
| H | 2.73156100               | 4.29089100                             | -1.88051200 |



|    |             |             |             |
|----|-------------|-------------|-------------|
| H  | -0.84314200 | 2.63311700  | 1.96161200  |
| C  | -2.02247900 | 2.25345400  | -0.73146800 |
| H  | -2.28732300 | 2.54672200  | -1.74397800 |
| C  | -2.82216700 | 1.43951700  | -0.02839800 |
| H  | -2.48908400 | 1.11267100  | 0.95452700  |
| N  | 0.20129600  | 3.24801200  | -1.08837200 |
| H  | -0.75088000 | -1.42142900 | -1.59455400 |
| H  | 0.11232600  | 3.26817300  | -2.09237000 |
| I  | 3.29443400  | -1.63058500 | -0.41850500 |
| Cl | 4.75133400  | -3.56785500 | -0.80679300 |
| C  | -4.11625800 | 0.90212400  | -0.46351500 |
| C  | -4.79093400 | 1.35709600  | -1.60603800 |
| C  | -4.70746700 | -0.11094200 | 0.29926700  |
| C  | -6.00602300 | 0.80086600  | -1.97750700 |
| H  | -4.37322500 | 2.16180400  | -2.19992400 |
| C  | -5.92521600 | -0.66797200 | -0.07289900 |
| H  | -4.19491600 | -0.47571000 | 1.18404400  |
| C  | -6.57858400 | -0.21586100 | -1.21360200 |
| H  | -6.51568700 | 1.16613100  | -2.86127500 |
| H  | -6.35792700 | -1.45908400 | 0.52847800  |
| H  | -7.52916900 | -0.64565100 | -1.50591400 |

Table S76. Calculated Gibbs free energy and XYZ coordinates for all atoms in **INT1c-exo** catalysed by ICl.

$G = -1868.8036$  Hartree

|   |             |             |             |
|---|-------------|-------------|-------------|
| C | 2.68632200  | 1.13147200  | 1.10060200  |
| C | 2.08659600  | 0.65005500  | 2.28858000  |
| C | 2.88435500  | 0.48432800  | 3.43202600  |
| C | 4.22920800  | 0.79688200  | 3.35940300  |
| C | 4.80234800  | 1.28070400  | 2.16667300  |
| C | 4.04284000  | 1.45621700  | 1.02405400  |
| C | 0.51637100  | 0.72192200  | 0.66469100  |
| C | 0.70335000  | 0.40698400  | 1.98738300  |
| H | 2.45027700  | 0.11811700  | 4.35517100  |
| H | 4.85620600  | 0.67470900  | 4.23424500  |
| H | 5.85816900  | 1.52238500  | 2.14539800  |
| H | 4.48047100  | 1.82166300  | 0.10269900  |
| H | -0.05262200 | 0.05218100  | 2.67126600  |
| C | -0.67846900 | 0.61365400  | -0.20254800 |
| H | -0.38024500 | 0.29712400  | -1.20180400 |
| C | -1.78641700 | -0.27696600 | 0.33797800  |
| H | -2.14404400 | 0.11133800  | 1.29501700  |

|    |             |             |             |
|----|-------------|-------------|-------------|
| H  | -2.63303300 | -0.24251200 | -0.35061900 |
| N  | 1.71317900  | 1.15033900  | 0.13123900  |
| C  | -3.07017900 | -3.29861600 | -0.18793300 |
| C  | -2.73711900 | -2.49549000 | 0.89870500  |
| C  | -3.61933600 | -2.38651300 | 1.95881600  |
| C  | -4.80984400 | -3.11290200 | 1.90255900  |
| C  | -5.11836500 | -3.91336600 | 0.80264300  |
| C  | -4.24589000 | -4.02030900 | -0.27789600 |
| C  | -1.00731700 | -2.48225200 | -0.68038700 |
| C  | -1.44171500 | -1.78951600 | 0.58894000  |
| H  | -3.39453900 | -1.75860000 | 2.81245000  |
| H  | -5.50928500 | -3.05124300 | 2.72650700  |
| H  | -6.05217900 | -4.46046700 | 0.78498900  |
| H  | -4.47500200 | -4.63459300 | -1.13906700 |
| H  | -0.68403500 | -1.87639000 | 1.36910500  |
| C  | 0.24596500  | -2.40444200 | -1.35652500 |
| H  | 0.28907600  | -2.79844600 | -2.36584500 |
| C  | 1.35913800  | -1.97177200 | -0.71621500 |
| H  | 1.27212300  | -1.66585100 | 0.32351900  |
| N  | -1.99792800 | -3.23623900 | -1.10877200 |
| H  | 1.82822200  | 1.50187800  | -0.80770800 |
| H  | -1.96124400 | -3.78262200 | -1.96330000 |
| I  | -1.53003700 | 2.60488600  | -0.56873700 |
| Cl | -2.82325900 | 5.43468100  | -1.21440500 |
| C  | 2.70259500  | -1.90174000 | -1.26224700 |
| C  | 2.98287100  | -2.09392000 | -2.62515700 |
| C  | 3.75497800  | -1.61391300 | -0.38086300 |
| C  | 4.28469900  | -2.00365500 | -3.08598400 |
| H  | 2.18273400  | -2.29638500 | -3.32693100 |
| C  | 5.05961700  | -1.52683200 | -0.84668500 |
| H  | 3.54233700  | -1.45204600 | 0.67083300  |
| C  | 5.32471500  | -1.72221200 | -2.19788300 |
| H  | 4.49536500  | -2.14549900 | -4.13850600 |
| H  | 5.86288000  | -1.29845600 | -0.15728600 |
| H  | 6.34107000  | -1.65032400 | -2.56582400 |

Table S77. Calculated Gibbs free energy and XYZ coordinates for all atoms in **TS2c-exo** catalysed by ICl.

$G = -1868.7584$  Hartree      Frequency =  $-500.62 \text{ cm}^{-1}$

|   |            |             |            |
|---|------------|-------------|------------|
| C | 2.98978800 | -0.37860200 | 1.56556500 |
| C | 2.08686900 | -0.42951700 | 2.65666900 |
| C | 2.60157000 | -0.61925100 | 3.94796900 |

|    |             |             |             |
|----|-------------|-------------|-------------|
| C  | 3.96914200  | -0.75881300 | 4.11348400  |
| C  | 4.84423500  | -0.71331500 | 3.01348200  |
| C  | 4.36760000  | -0.52284300 | 1.72598000  |
| C  | 0.90285100  | -0.12202700 | 0.74899700  |
| C  | 0.76888400  | -0.26587200 | 2.11541400  |
| H  | 1.93555800  | -0.65799800 | 4.80245500  |
| H  | 4.37615700  | -0.90654900 | 5.10667700  |
| H  | 5.90931300  | -0.82760900 | 3.17520900  |
| H  | 5.03688800  | -0.48493100 | 0.87445500  |
| H  | -0.15756400 | -0.23164700 | 2.66788000  |
| C  | -0.12081500 | -0.01409000 | -0.27087300 |
| H  | 0.17506200  | 0.05590500  | -1.31024500 |
| C  | -1.54204800 | 0.22030200  | 0.14745500  |
| H  | -1.57619800 | 0.89471100  | 1.00648900  |
| H  | -2.11408400 | 0.68904500  | -0.65432700 |
| N  | 2.24408700  | -0.18629100 | 0.42683500  |
| C  | -4.61923500 | -1.28461800 | 0.00545100  |
| C  | -3.76022900 | -0.76431900 | 0.97973800  |
| C  | -4.27918500 | -0.05704000 | 2.05034200  |
| C  | -5.66119700 | 0.11905300  | 2.13191800  |
| C  | -6.50163000 | -0.40440300 | 1.14972200  |
| C  | -5.99518000 | -1.11745100 | 0.06517700  |
| C  | -2.53172900 | -1.92023000 | -0.63903100 |
| C  | -2.34791700 | -1.08060500 | 0.58291000  |
| H  | -3.62472400 | 0.35350600  | 2.81124700  |
| H  | -6.08538100 | 0.66824700  | 2.96285300  |
| H  | -7.57165200 | -0.25547900 | 1.22860500  |
| H  | -6.64865000 | -1.52356200 | -0.69679400 |
| H  | -1.77097300 | -1.57970500 | 1.36725000  |
| C  | -1.46582500 | -2.36430300 | -1.37890900 |
| H  | -1.59611000 | -2.73737300 | -2.38795400 |
| C  | -0.18335800 | -2.18166700 | -0.82137600 |
| H  | -0.08262300 | -2.30579700 | 0.25262600  |
| N  | -3.85331100 | -1.95804700 | -0.95054900 |
| H  | 2.61043600  | -0.14021500 | -0.51170300 |
| H  | -4.22764800 | -2.39082800 | -1.78185500 |
| I  | 0.35448700  | 2.63282200  | -0.81543200 |
| Cl | 0.75122400  | 5.03122500  | -1.23915500 |
| C  | 1.04448400  | -2.45216000 | -1.57554000 |
| C  | 2.17833100  | -2.92201100 | -0.90093700 |
| C  | 1.12507600  | -2.21741100 | -2.95477500 |
| C  | 3.35983400  | -3.16641200 | -1.58944700 |
| H  | 2.12756100  | -3.08763300 | 0.17038000  |
| C  | 2.30764800  | -2.45690000 | -3.64071300 |

|   |            |             |             |
|---|------------|-------------|-------------|
| H | 0.26325600 | -1.82586000 | -3.48469500 |
| C | 3.42680400 | -2.93371100 | -2.96035700 |
| H | 4.22807400 | -3.53352800 | -1.05563500 |
| H | 2.36143900 | -2.26551500 | -4.70548700 |
| H | 4.34918000 | -3.11791700 | -3.49777200 |

Table S78. Calculated Gibbs free energy and XYZ coordinates for all atoms in **2c-exo** catalysed by ICl.

$G = -1868.8125$  Hartree

|   |             |             |             |
|---|-------------|-------------|-------------|
| C | -2.83881600 | 0.70963700  | 1.18442500  |
| C | -2.32194400 | -0.43250300 | 1.82234600  |
| C | -3.10844700 | -1.10841000 | 2.76017400  |
| C | -4.37758700 | -0.62394300 | 3.02934600  |
| C | -4.87739600 | 0.51429700  | 2.37385700  |
| C | -4.11821100 | 1.19808400  | 1.43832100  |
| C | -0.75483100 | 0.39589600  | 0.37581600  |
| C | -1.00472100 | -0.66088600 | 1.26322900  |
| H | -2.73230900 | -1.99284000 | 3.26036200  |
| H | -5.00101100 | -1.13106400 | 3.75536800  |
| H | -5.87644600 | 0.86336300  | 2.60401600  |
| H | -4.49849400 | 2.07448500  | 0.92809000  |
| H | -0.25208700 | -1.32673900 | 1.65762400  |
| C | 0.49237600  | 0.77140800  | -0.37256100 |
| H | 0.21351800  | 0.90677300  | -1.42129900 |
| C | 1.58055800  | -0.32273700 | -0.30388400 |
| H | 1.14608300  | -1.29866600 | -0.08458500 |
| H | 2.05869200  | -0.40771800 | -1.28118300 |
| N | -1.86065200 | 1.17961300  | 0.32077300  |
| C | 5.02015800  | -0.10689600 | 0.43186600  |
| C | 3.88645700  | -0.88367500 | 0.71101400  |
| C | 4.01164700  | -2.24221000 | 0.92708100  |
| C | 5.27985000  | -2.82849800 | 0.85551900  |
| C | 6.39562700  | -2.04646300 | 0.57384300  |
| C | 6.28579500  | -0.67127200 | 0.35926900  |
| C | 3.26673100  | 1.35402100  | 0.30968900  |
| C | 2.67656800  | 0.01938100  | 0.71602000  |
| H | 3.13851100  | -2.84847000 | 1.14374100  |
| H | 5.39303200  | -3.89300700 | 1.01710800  |
| H | 7.37327400  | -2.51055600 | 0.51811900  |
| H | 7.15793200  | -0.06724500 | 0.14054100  |
| H | 2.23550800  | 0.08343500  | 1.71986800  |

|    |             |             |             |
|----|-------------|-------------|-------------|
| C  | 2.47306200  | 2.37206300  | -0.02984100 |
| H  | 2.84842900  | 3.32496000  | -0.38196000 |
| C  | 0.98481100  | 2.18017000  | 0.16431300  |
| H  | 0.77072800  | 2.18211900  | 1.24135000  |
| N  | 4.64855600  | 1.22754400  | 0.27424500  |
| H  | -1.95830100 | 1.97967100  | -0.28979300 |
| H  | 5.25094900  | 1.92172300  | -0.13893000 |
| I  | -1.65415500 | -2.20748000 | -0.80868100 |
| Cl | -2.34919400 | -3.78358400 | -2.56747400 |
| C  | 0.19784500  | 3.31766000  | -0.45449600 |
| C  | -0.60018800 | 4.15101700  | 0.32947700  |
| C  | 0.26773600  | 3.55595700  | -1.82998700 |
| C  | -1.32376000 | 5.19261000  | -0.24698000 |
| H  | -0.66076300 | 3.97720100  | 1.39898000  |
| C  | -0.45186500 | 4.59472800  | -2.40835000 |
| H  | 0.89690900  | 2.92416300  | -2.44968300 |
| C  | -1.25299800 | 5.41515200  | -1.61750600 |
| H  | -1.94017000 | 5.82913100  | 0.37666200  |
| H  | -0.38788600 | 4.76520200  | -3.47642500 |
| H  | -1.81567700 | 6.22382300  | -2.06795400 |

Table S79. Calculated Gibbs free energy and XYZ coordinates for all atoms in **COM1d-endo** catalysed by ICl.

$G = -1868.7989$  Hartree

|   |             |             |             |
|---|-------------|-------------|-------------|
| C | -2.83881600 | 0.70963700  | 1.18442500  |
| C | -2.32194400 | -0.43250300 | 1.82234600  |
| C | -3.10844700 | -1.10841000 | 2.76017400  |
| C | -4.37758700 | -0.62394300 | 3.02934600  |
| C | -4.87739600 | 0.51429700  | 2.37385700  |
| C | -4.11821100 | 1.19808400  | 1.43832100  |
| C | -0.75483100 | 0.39589600  | 0.37581600  |
| C | -1.00472100 | -0.66088600 | 1.26322900  |
| H | -2.73230900 | -1.99284000 | 3.26036200  |
| H | -5.00101100 | -1.13106400 | 3.75536800  |
| H | -5.87644600 | 0.86336300  | 2.60401600  |
| H | -4.49849400 | 2.07448500  | 0.92809000  |
| H | -0.25208700 | -1.32673900 | 1.65762400  |
| C | 0.49237600  | 0.77140800  | -0.37256100 |
| H | 0.21351800  | 0.90677300  | -1.42129900 |
| C | 1.58055800  | -0.32273700 | -0.30388400 |
| H | 1.14608300  | -1.29866600 | -0.08458500 |
| H | 2.05869200  | -0.40771800 | -1.28118300 |
| N | -1.86065200 | 1.17961300  | 0.32077300  |

|    |             |             |             |
|----|-------------|-------------|-------------|
| C  | 5.02015800  | -0.10689600 | 0.43186600  |
| C  | 3.88645700  | -0.88367500 | 0.71101400  |
| C  | 4.01164700  | -2.24221000 | 0.92708100  |
| C  | 5.27985000  | -2.82849800 | 0.85551900  |
| C  | 6.39562700  | -2.04646300 | 0.57384300  |
| C  | 6.28579500  | -0.67127200 | 0.35926900  |
| C  | 3.26673100  | 1.35402100  | 0.30968900  |
| C  | 2.67656800  | 0.01938100  | 0.71602000  |
| H  | 3.13851100  | -2.84847000 | 1.14374100  |
| H  | 5.39303200  | -3.89300700 | 1.01710800  |
| H  | 7.37327400  | -2.51055600 | 0.51811900  |
| H  | 7.15793200  | -0.06724500 | 0.14054100  |
| H  | 2.23550800  | 0.08343500  | 1.71986800  |
| C  | 2.47306200  | 2.37206300  | -0.02984100 |
| H  | 2.84842900  | 3.32496000  | -0.38196000 |
| C  | 0.98481100  | 2.18017000  | 0.16431300  |
| H  | 0.77072800  | 2.18211900  | 1.24135000  |
| N  | 4.64855600  | 1.22754400  | 0.27424500  |
| H  | -1.95830100 | 1.97967100  | -0.28979300 |
| H  | 5.25094900  | 1.92172300  | -0.13893000 |
| I  | -1.65415500 | -2.20748000 | -0.80868100 |
| Cl | -2.34919400 | -3.78358400 | -2.56747400 |
| C  | 0.19784500  | 3.31766000  | -0.45449600 |
| C  | -0.60018800 | 4.15101700  | 0.32947700  |
| C  | 0.26773600  | 3.55595700  | -1.82998700 |
| C  | -1.32376000 | 5.19261000  | -0.24698000 |
| H  | -0.66076300 | 3.97720100  | 1.39898000  |
| C  | -0.45186500 | 4.59472800  | -2.40835000 |
| H  | 0.89690900  | 2.92416300  | -2.44968300 |
| C  | -1.25299800 | 5.41515200  | -1.61750600 |
| H  | -1.94017000 | 5.82913100  | 0.37666200  |
| H  | -0.38788600 | 4.76520200  | -3.47642500 |
| H  | -1.81567700 | 6.22382300  | -2.06795400 |

Table S80. Calculated Gibbs free energy and XYZ coordinates for all atoms in **TS1d-endo** catalysed by ICl.

|   | $G = -1868.7756$ Hartree | Frequency = $-401.60$ cm <sup>-1</sup> |             |
|---|--------------------------|----------------------------------------|-------------|
| C | 2.64757200               | 0.66918500                             | -0.49103100 |
| C | 1.82736000               | 0.89340500                             | 0.62018500  |
| C | 2.39364300               | 1.26678200                             | 1.82738600  |
| C | 3.78102500               | 1.40078900                             | 1.89838900  |
| C | 4.57844100               | 1.19060200                             | 0.77401600  |
| C | 4.02183300               | 0.82277900                             | -0.44994800 |

|    |             |             |             |
|----|-------------|-------------|-------------|
| C  | 0.54750800  | 0.11140200  | -1.17171800 |
| C  | 0.41575500  | 0.70100300  | 0.19022600  |
| H  | 1.77212500  | 1.45791700  | 2.69448400  |
| H  | 4.24372700  | 1.68463300  | 2.83537800  |
| H  | 5.65234600  | 1.31004000  | 0.85099600  |
| H  | 4.63893900  | 0.64464900  | -1.32162900 |
| H  | -0.24669400 | 0.17128200  | 0.86559300  |
| C  | -0.43957600 | -0.47961800 | -1.95176600 |
| H  | -0.16082600 | -0.85016900 | -2.93217200 |
| C  | -1.75503900 | -0.63609100 | -1.50281000 |
| H  | -2.52033900 | -0.81585300 | -2.24810000 |
| H  | -2.09766400 | -0.05532300 | -0.65110400 |
| N  | 1.83466300  | 0.25095300  | -1.55347600 |
| C  | -3.57734500 | -2.06103000 | 1.04948100  |
| C  | -3.52246900 | -2.38344000 | -0.31721900 |
| C  | -4.70626600 | -2.45362600 | -1.05403800 |
| C  | -5.90573800 | -2.21335500 | -0.40232200 |
| C  | -5.93702600 | -1.89038800 | 0.96363600  |
| C  | -4.77409300 | -1.80483100 | 1.71270600  |
| C  | -1.39807900 | -2.38310700 | 0.54589700  |
| C  | -2.11795500 | -2.48718400 | -0.67751300 |
| H  | -4.68633700 | -2.69533800 | -2.11027400 |
| H  | -6.83603700 | -2.27121900 | -0.95326200 |
| H  | -6.88976600 | -1.70123000 | 1.44222500  |
| H  | -4.79458800 | -1.54987100 | 2.76466600  |
| H  | -1.75342500 | -3.05410200 | -1.52088900 |
| C  | 0.00973100  | -2.46242300 | 0.77181800  |
| H  | 0.35834300  | -2.23457100 | 1.77419900  |
| C  | 0.88584500  | -2.70578900 | -0.22795100 |
| H  | 0.49328200  | -2.96098000 | -1.20792500 |
| N  | -2.27530900 | -2.06352100 | 1.53268800  |
| H  | -2.01321100 | -1.85800200 | 2.48671900  |
| H  | 2.18749900  | -0.04786000 | -2.45163600 |
| I  | -0.57116400 | 2.70358000  | -0.05172500 |
| Cl | -1.87163100 | 5.29145900  | -0.30713100 |
| C  | 2.34180200  | -2.64653200 | -0.13728700 |
| C  | 3.02327800  | -2.37107700 | 1.05855800  |
| C  | 3.08594300  | -2.82129700 | -1.31066100 |
| C  | 4.40447500  | -2.27948400 | 1.07323000  |
| H  | 2.47447200  | -2.21899500 | 1.97997900  |
| C  | 4.47236400  | -2.72237300 | -1.29603700 |
| H  | 2.56642600  | -3.03573100 | -2.23915400 |
| C  | 5.13363100  | -2.45187500 | -0.10374600 |
| H  | 4.91802000  | -2.05924900 | 2.00105500  |

|   |            |             |             |
|---|------------|-------------|-------------|
| H | 5.03401500 | -2.85928200 | -2.21212000 |
| H | 6.21394700 | -2.37183500 | -0.08773100 |

Table S81. Calculated Gibbs free energy and XYZ coordinates for all atoms in **INT1d-endo** catalysed by ICl.

$G = -1868.7884$  Hartree

|   |             |             |             |
|---|-------------|-------------|-------------|
| C | 2.83358900  | 0.46821700  | -0.73392200 |
| C | 2.13021200  | 0.82333600  | 0.42408600  |
| C | 2.81284600  | 1.20728500  | 1.56334200  |
| C | 4.20979000  | 1.22002200  | 1.53815300  |
| C | 4.89606000  | 0.87249400  | 0.37698000  |
| C | 4.21878700  | 0.49266000  | -0.78225300 |
| C | 0.63535900  | 0.04741200  | -1.22174700 |
| C | 0.66752100  | 0.71396300  | 0.13178600  |
| H | 2.27188000  | 1.49953800  | 2.45663700  |
| H | 4.76167900  | 1.51417200  | 2.42208500  |
| H | 5.97955800  | 0.89488400  | 0.36998100  |
| H | 4.75486800  | 0.21564800  | -1.68189200 |
| H | 0.08247000  | 0.19178800  | 0.88473200  |
| C | -0.41256200 | -0.54351500 | -1.82961100 |
| H | -0.25449100 | -1.00044600 | -2.80289100 |
| C | -1.79217900 | -0.57725000 | -1.27531700 |
| H | -2.51194400 | -0.30961000 | -2.05213500 |
| H | -1.92887900 | 0.14219500  | -0.46481000 |
| N | 1.92431700  | 0.10913600  | -1.72630400 |
| C | -3.90576300 | -1.99780900 | 0.95117400  |
| C | -3.75181000 | -1.93358900 | -0.43096700 |
| C | -4.86365000 | -1.74867100 | -1.23459200 |
| C | -6.11217700 | -1.64778400 | -0.62168000 |
| C | -6.24137200 | -1.71714500 | 0.76625400  |
| C | -5.13063800 | -1.89269900 | 1.58715700  |
| C | -1.68068600 | -2.28684700 | 0.59148100  |
| C | -2.28590900 | -1.99878900 | -0.75387800 |
| H | -4.76806200 | -1.68462100 | -2.31216500 |
| H | -6.99606000 | -1.50830600 | -1.23090600 |
| H | -7.22216800 | -1.62937600 | 1.21596100  |
| H | -5.22211200 | -1.94259600 | 2.66444800  |
| H | -2.03081300 | -2.75274400 | -1.50084200 |
| C | -0.31482900 | -2.49919400 | 0.89351600  |
| H | -0.00731900 | -2.42316400 | 1.93080300  |
| C | 0.58184300  | -2.73374500 | -0.10183400 |
| H | 0.20077600  | -2.92642000 | -1.09812200 |



|    |             |             |             |
|----|-------------|-------------|-------------|
| N  | -2.62721100 | -2.19380800 | 1.51393300  |
| H  | -2.45289700 | -2.27737300 | 2.50877000  |
| H  | 2.19401500  | -0.34140600 | -2.58668900 |
| I  | -0.26969500 | 2.70568600  | 0.02735400  |
| Cl | -1.73925500 | 5.50374200  | -0.03309700 |
| C  | 2.02645200  | -2.77497200 | 0.02128900  |
| C  | 2.69750100  | -2.40428500 | 1.19813900  |
| C  | 2.77607800  | -3.13375200 | -1.10800300 |
| C  | 4.08032300  | -2.40930000 | 1.24189400  |
| H  | 2.13880400  | -2.08524300 | 2.06982200  |
| C  | 4.16282700  | -3.14100000 | -1.06083600 |
| H  | 2.25928100  | -3.40631800 | -2.02229100 |
| C  | 4.81391600  | -2.77907000 | 0.11417000  |
| H  | 4.59245600  | -2.10556200 | 2.14606600  |
| H  | 4.73442900  | -3.42167400 | -1.93667800 |
| H  | 5.89677900  | -2.77145200 | 0.15093300  |

Table S82. Calculated Gibbs free energy and XYZ coordinates for all atoms in **TS2d-endo** catalysed by ICl.

|   | $G = -1868.7815$ Hartree | Frequency = $-228.51$ $\text{cm}^{-1}$ |             |
|---|--------------------------|----------------------------------------|-------------|
| C | 2.83358900               | 0.46821700                             | -0.73392200 |
| C | 2.13021200               | 0.82333600                             | 0.42408600  |
| C | 2.81284600               | 1.20728500                             | 1.56334200  |
| C | 4.20979000               | 1.22002200                             | 1.53815300  |
| C | 4.89606000               | 0.87249400                             | 0.37698000  |
| C | 4.21878700               | 0.49266000                             | -0.78225300 |
| C | 0.63535900               | 0.04741200                             | -1.22174700 |
| C | 0.66752100               | 0.71396300                             | 0.13178600  |
| H | 2.27188000               | 1.49953800                             | 2.45663700  |
| H | 4.76167900               | 1.51417200                             | 2.42208500  |
| H | 5.97955800               | 0.89488400                             | 0.36998100  |
| H | 4.75486800               | 0.21564800                             | -1.68189200 |
| H | 0.08247000               | 0.19178800                             | 0.88473200  |
| C | -0.41256200              | -0.54351500                            | -1.82961100 |
| H | -0.25449100              | -1.00044600                            | -2.80289100 |
| C | -1.79217900              | -0.57725000                            | -1.27531700 |
| H | -2.51194400              | -0.30961000                            | -2.05213500 |
| H | -1.92887900              | 0.14219500                             | -0.46481000 |
| N | 1.92431700               | 0.10913600                             | -1.72630400 |
| C | -3.90576300              | -1.99780900                            | 0.95117400  |
| C | -3.75181000              | -1.93358900                            | -0.43096700 |

|    |             |             |             |
|----|-------------|-------------|-------------|
| C  | -4.86365000 | -1.74867100 | -1.23459200 |
| C  | -6.11217700 | -1.64778400 | -0.62168000 |
| C  | -6.24137200 | -1.71714500 | 0.76625400  |
| C  | -5.13063800 | -1.89269900 | 1.58715700  |
| C  | -1.68068600 | -2.28684700 | 0.59148100  |
| C  | -2.28590900 | -1.99878900 | -0.75387800 |
| H  | -4.76806200 | -1.68462100 | -2.31216500 |
| H  | -6.99606000 | -1.50830600 | -1.23090600 |
| H  | -7.22216800 | -1.62937600 | 1.21596100  |
| H  | -5.22211200 | -1.94259600 | 2.66444800  |
| H  | -2.03081300 | -2.75274400 | -1.50084200 |
| C  | -0.31482900 | -2.49919400 | 0.89351600  |
| H  | -0.00731900 | -2.42316400 | 1.93080300  |
| C  | 0.58184300  | -2.73374500 | -0.10183400 |
| H  | 0.20077600  | -2.92642000 | -1.09812200 |
| N  | -2.62721100 | -2.19380800 | 1.51393300  |
| H  | -2.45289700 | -2.27737300 | 2.50877000  |
| H  | 2.19401500  | -0.34140600 | -2.58668900 |
| I  | -0.26969500 | 2.70568600  | 0.02735400  |
| Cl | -1.73925500 | 5.50374200  | -0.03309700 |
| C  | 2.02645200  | -2.77497200 | 0.02128900  |
| C  | 2.69750100  | -2.40428500 | 1.19813900  |
| C  | 2.77607800  | -3.13375200 | -1.10800300 |
| C  | 4.08032300  | -2.40930000 | 1.24189400  |
| H  | 2.13880400  | -2.08524300 | 2.06982200  |
| C  | 4.16282700  | -3.14100000 | -1.06083600 |
| H  | 2.25928100  | -3.40631800 | -2.02229100 |
| C  | 4.81391600  | -2.77907000 | 0.11417000  |
| H  | 4.59245600  | -2.10556200 | 2.14606600  |
| H  | 4.73442900  | -3.42167400 | -1.93667800 |
| H  | 5.89677900  | -2.77145200 | 0.15093300  |

Table S83. Calculated Gibbs free energy and XYZ coordinates for all atoms in **2d-endo** catalysed by ICl.

$G = -1868.8108$  Hartree

|   |            |             |             |
|---|------------|-------------|-------------|
| C | 3.03695500 | 0.22702100  | 0.00001400  |
| C | 2.29506000 | 0.58147800  | 1.14169000  |
| C | 2.95924000 | 1.11456300  | 2.25044700  |
| C | 4.33450900 | 1.26616500  | 2.18675700  |
| C | 5.05518800 | 0.90935400  | 1.03400800  |
| C | 4.41768000 | 0.38964000  | -0.08052500 |
| C | 0.88561800 | -0.28886300 | -0.43364700 |
| C | 0.90323000 | 0.31104400  | 0.83574500  |

|    |             |             |             |
|----|-------------|-------------|-------------|
| H  | 2.40790800  | 1.40146700  | 3.13795900  |
| H  | 4.86809800  | 1.66945000  | 3.03865700  |
| H  | 6.12965600  | 1.04407100  | 1.01697700  |
| H  | 4.96646000  | 0.11167600  | -0.97201000 |
| H  | 0.08989600  | 0.25305700  | 1.54413000  |
| C  | -0.20925500 | -1.02888600 | -1.13812600 |
| H  | 0.02634100  | -1.01912900 | -2.20657200 |
| C  | -1.59695100 | -0.38537500 | -0.91627000 |
| H  | -1.83049700 | 0.29042000  | -1.74106600 |
| H  | -1.59519400 | 0.21571700  | -0.00537300 |
| N  | 2.14350300  | -0.27532400 | -0.93270800 |
| C  | -4.37548600 | -1.50665800 | 0.92540500  |
| C  | -4.04316200 | -0.90947100 | -0.29920100 |
| C  | -4.90352500 | -0.00132400 | -0.88511900 |
| C  | -6.10286700 | 0.31451600  | -0.23816000 |
| C  | -6.41964300 | -0.28488500 | 0.97694900  |
| C  | -5.56265100 | -1.20784700 | 1.57913300  |
| C  | -2.30202000 | -2.32626400 | 0.41956100  |
| C  | -2.70172100 | -1.44021900 | -0.74276800 |
| H  | -4.65099900 | 0.46453700  | -1.83153100 |
| H  | -6.78487000 | 1.02825900  | -0.68255900 |
| H  | -7.35040800 | -0.03212400 | 1.47096200  |
| H  | -5.81487500 | -1.67152500 | 2.52496000  |
| H  | -2.79456100 | -2.03216200 | -1.66248300 |
| C  | -1.06390500 | -2.82490400 | 0.48987800  |
| H  | -0.71593200 | -3.43199800 | 1.31589500  |
| C  | -0.18821700 | -2.56942600 | -0.70986800 |
| H  | -0.62750800 | -3.07815400 | -1.57722000 |
| N  | -3.36718000 | -2.39116600 | 1.30501500  |
| H  | -3.29322400 | -2.78471300 | 2.22958700  |
| H  | 2.40115000  | -0.67367300 | -1.82492500 |
| I  | 0.24491300  | 2.66739700  | -0.17238200 |
| Cl | -0.28861500 | 4.96578400  | -0.91135900 |
| C  | 1.22987400  | -3.07239600 | -0.57166700 |
| C  | 1.91271900  | -3.52993900 | -1.69931400 |
| C  | 1.91982600  | -2.98343600 | 0.63931300  |
| C  | 3.26065700  | -3.87042200 | -1.62755300 |
| H  | 1.38430200  | -3.61250300 | -2.64437800 |
| C  | 3.26664800  | -3.32032000 | 0.71434600  |
| H  | 1.40963100  | -2.61558000 | 1.52314600  |
| C  | 3.94321800  | -3.75966900 | -0.42010000 |
| H  | 3.77567000  | -4.22421500 | -2.51298500 |
| H  | 3.79114200  | -3.22994900 | 1.65838200  |
| H  | 4.99351800  | -4.01872300 | -0.36192000 |

Table S84. Calculated Gibbs free energy and XYZ coordinates for all atoms in **COM1d-exo** catalysed by ICl.

$G = -1868.8005$  Hartree

|   |             |             |             |
|---|-------------|-------------|-------------|
| C | -1.85317900 | 0.84752500  | 0.73970100  |
| C | -1.27002100 | 1.00421400  | -0.52880600 |
| C | -2.06142000 | 1.44049900  | -1.59558700 |
| C | -3.39908400 | 1.70657600  | -1.35692100 |
| C | -3.95864300 | 1.55251900  | -0.07670000 |
| C | -3.19456400 | 1.12136300  | 0.99361800  |
| C | 0.31337300  | 0.25086300  | 0.94602200  |
| C | 0.14134800  | 0.68818000  | -0.38965000 |
| H | -1.63289300 | 1.57444900  | -2.58175400 |
| H | -4.03091900 | 2.04028200  | -2.17117800 |
| H | -5.01029700 | 1.76321900  | 0.07251300  |
| H | -3.62200400 | 0.98722900  | 1.97942100  |
| H | 0.79857600  | 0.38827100  | -1.19237900 |
| C | 1.49193300  | -0.27494500 | 1.61502600  |
| H | 1.34818600  | -0.63066400 | 2.63054200  |
| C | 2.69325100  | -0.33109000 | 1.03944600  |
| H | 2.86080300  | 0.02767400  | 0.02998300  |
| H | 3.54707500  | -0.74276600 | 1.56284300  |
| N | -0.86232300 | 0.38333800  | 1.59605400  |
| C | 2.76074100  | -3.44503600 | 0.30129700  |
| C | 2.69914600  | -2.82782900 | -0.97393200 |
| C | 3.89549200  | -2.61192000 | -1.68050500 |
| C | 5.09029000  | -3.00237000 | -1.10824900 |
| C | 5.12628000  | -3.61742900 | 0.16031800  |
| C | 3.96807400  | -3.84931400 | 0.87894500  |
| C | 0.60695600  | -2.94466400 | -0.12708100 |
| C | 1.32531000  | -2.52868600 | -1.22575500 |
| H | 3.87710400  | -2.14058300 | -2.65651900 |
| H | 6.01957600  | -2.83728900 | -1.63996400 |
| H | 6.08052500  | -3.91353400 | 0.57895900  |
| H | 3.99312100  | -4.32134400 | 1.85399200  |
| H | 0.91752100  | -2.05321900 | -2.10419800 |
| C | -0.80239600 | -2.82578000 | 0.20420900  |
| H | -1.09578400 | -3.23196000 | 1.16881300  |
| C | -1.71795700 | -2.24934600 | -0.58688100 |
| H | -1.40524600 | -1.87366600 | -1.55871700 |
| N | 1.48007100  | -3.51216200 | 0.78153400  |

|    |             |             |             |
|----|-------------|-------------|-------------|
| H  | -0.98139400 | 0.23030400  | 2.58779900  |
| H  | 1.21172200  | -3.89241400 | 1.67547000  |
| I  | 1.16478700  | 2.98444500  | -0.04087800 |
| Cl | 2.19382800  | 5.27406100  | 0.13470200  |
| C  | -3.13985600 | -2.06736400 | -0.27535200 |
| C  | -4.00644100 | -1.66219600 | -1.29515300 |
| C  | -3.66831400 | -2.25729200 | 1.01004900  |
| C  | -5.36043800 | -1.46507600 | -1.04870600 |
| H  | -3.60813000 | -1.49369300 | -2.28993700 |
| C  | -5.01766300 | -2.05790700 | 1.25738700  |
| H  | -3.01769100 | -2.54488900 | 1.82816000  |
| C  | -5.87156600 | -1.66146600 | 0.22836400  |
| H  | -6.01364300 | -1.15027100 | -1.85408600 |
| H  | -5.40796500 | -2.20602700 | 2.25755100  |
| H  | -6.92518800 | -1.50415200 | 0.42555200  |

Table S85. Calculated Gibbs free energy and XYZ coordinates for all atoms in **TS1d-exo** catalysed by ICl.

|   | $G = -1868.7707$ Hartree | Frequency = $-429.31$ $\text{cm}^{-1}$ |             |
|---|--------------------------|----------------------------------------|-------------|
| C | -1.85317900              | 0.84752500                             | 0.73970100  |
| C | -1.27002100              | 1.00421400                             | -0.52880600 |
| C | -2.06142000              | 1.44049900                             | -1.59558700 |
| C | -3.39908400              | 1.70657600                             | -1.35692100 |
| C | -3.95864300              | 1.55251900                             | -0.07670000 |
| C | -3.19456400              | 1.12136300                             | 0.99361800  |
| C | 0.31337300               | 0.25086300                             | 0.94602200  |
| C | 0.14134800               | 0.68818000                             | -0.38965000 |
| H | -1.63289300              | 1.57444900                             | -2.58175400 |
| H | -4.03091900              | 2.04028200                             | -2.17117800 |
| H | -5.01029700              | 1.76321900                             | 0.07251300  |
| H | -3.62200400              | 0.98722900                             | 1.97942100  |
| H | 0.79857600               | 0.38827100                             | -1.19237900 |
| C | 1.49193300               | -0.27494500                            | 1.61502600  |
| H | 1.34818600               | -0.63066400                            | 2.63054200  |
| C | 2.69325100               | -0.33109000                            | 1.03944600  |
| H | 2.86080300               | 0.02767400                             | 0.02998300  |
| H | 3.54707500               | -0.74276600                            | 1.56284300  |
| N | -0.86232300              | 0.38333800                             | 1.59605400  |
| C | 2.76074100               | -3.44503600                            | 0.30129700  |
| C | 2.69914600               | -2.82782900                            | -0.97393200 |
| C | 3.89549200               | -2.61192000                            | -1.68050500 |
| C | 5.09029000               | -3.00237000                            | -1.10824900 |
| C | 5.12628000               | -3.61742900                            | 0.16031800  |

|    |             |             |             |
|----|-------------|-------------|-------------|
| C  | 3.96807400  | -3.84931400 | 0.87894500  |
| C  | 0.60695600  | -2.94466400 | -0.12708100 |
| C  | 1.32531000  | -2.52868600 | -1.22575500 |
| H  | 3.87710400  | -2.14058300 | -2.65651900 |
| H  | 6.01957600  | -2.83728900 | -1.63996400 |
| H  | 6.08052500  | -3.91353400 | 0.57895900  |
| H  | 3.99312100  | -4.32134400 | 1.85399200  |
| H  | 0.91752100  | -2.05321900 | -2.10419800 |
| C  | -0.80239600 | -2.82578000 | 0.20420900  |
| H  | -1.09578400 | -3.23196000 | 1.16881300  |
| C  | -1.71795700 | -2.24934600 | -0.58688100 |
| H  | -1.40524600 | -1.87366600 | -1.55871700 |
| N  | 1.48007100  | -3.51216200 | 0.78153400  |
| H  | -0.98139400 | 0.23030400  | 2.58779900  |
| H  | 1.21172200  | -3.89241400 | 1.67547000  |
| I  | 1.16478700  | 2.98444500  | -0.04087800 |
| Cl | 2.19382800  | 5.27406100  | 0.13470200  |
| C  | -3.13985600 | -2.06736400 | -0.27535200 |
| C  | -4.00644100 | -1.66219600 | -1.29515300 |
| C  | -3.66831400 | -2.25729200 | 1.01004900  |
| C  | -5.36043800 | -1.46507600 | -1.04870600 |
| H  | -3.60813000 | -1.49369300 | -2.28993700 |
| C  | -5.01766300 | -2.05790700 | 1.25738700  |
| H  | -3.01769100 | -2.54488900 | 1.82816000  |
| C  | -5.87156600 | -1.66146600 | 0.22836400  |
| H  | -6.01364300 | -1.15027100 | -1.85408600 |
| H  | -5.40796500 | -2.20602700 | 2.25755100  |
| H  | -6.92518800 | -1.50415200 | 0.42555200  |

Table S86. Calculated Gibbs free energy and XYZ coordinates for all atoms in **INT1d-exo** catalysed by ICl.

$G = -1868.7830$  Hartree

|   |            |            |             |
|---|------------|------------|-------------|
| C | 2.60423600 | 1.56357100 | -0.29495600 |
| C | 1.68979500 | 1.85871400 | 0.72390500  |
| C | 2.07449900 | 2.63762500 | 1.80083800  |
| C | 3.38890900 | 3.10587400 | 1.85799500  |
| C | 4.28849600 | 2.80368000 | 0.83774400  |
| C | 3.91126400 | 2.02780600 | -0.25900700 |
| C | 0.71248000 | 0.38306700 | -0.83376500 |
| C | 0.37989700 | 1.22757100 | 0.37195900  |
| H | 1.36383000 | 2.88404500 | 2.58171600  |

|    |             |             |             |
|----|-------------|-------------|-------------|
| H  | 3.70858400  | 3.71254600  | 2.69560800  |
| H  | 5.30333300  | 3.17938300  | 0.89224800  |
| H  | 4.61279600  | 1.79257300  | -1.05012700 |
| H  | -0.09288400 | 0.67326200  | 1.17999000  |
| C  | -0.02653600 | -0.59510300 | -1.39122800 |
| H  | 0.39523000  | -1.13753300 | -2.23032400 |
| C  | -1.40331800 | -0.95305800 | -0.94410100 |
| H  | -1.97539800 | -0.05980700 | -0.68172800 |
| H  | -1.94354600 | -1.44885700 | -1.75261200 |
| N  | 1.98482100  | 0.75395300  | -1.24077800 |
| C  | -3.15751300 | -3.59558900 | 0.22576500  |
| C  | -2.98900300 | -2.24501200 | 0.52256000  |
| C  | -4.09394300 | -1.46768500 | 0.82538900  |
| C  | -5.34638800 | -2.08142900 | 0.84159500  |
| C  | -5.48976700 | -3.43779300 | 0.54581000  |
| C  | -4.38857800 | -4.22794800 | 0.22573800  |
| C  | -0.91937200 | -3.23673500 | 0.08590900  |
| C  | -1.54121900 | -1.89374000 | 0.33332700  |
| H  | -3.99181800 | -0.41127400 | 1.04446900  |
| H  | -6.22324300 | -1.49451700 | 1.08341900  |
| H  | -6.47506600 | -3.88600400 | 0.56181900  |
| H  | -4.49245700 | -5.27907000 | -0.01062100 |
| H  | -1.09603900 | -1.39004100 | 1.19343500  |
| C  | 0.46025500  | -3.51928200 | -0.07737100 |
| H  | 0.74009900  | -4.47431700 | -0.50709000 |
| C  | 1.38202400  | -2.58625600 | 0.27447300  |
| H  | 1.03278800  | -1.70177900 | 0.79418400  |
| N  | -1.88078400 | -4.13670300 | -0.04291500 |
| H  | 2.47279800  | 0.29978500  | -1.99707800 |
| H  | -1.71369900 | -5.11361800 | -0.25659200 |
| I  | -1.12249200 | 2.75996300  | -0.14659900 |
| Cl | -3.33823400 | 4.85759500  | -0.83237000 |
| C  | 2.81604200  | -2.62651700 | 0.05828400  |
| C  | 3.57771000  | -1.54789700 | 0.53179500  |
| C  | 3.45831700  | -3.66660900 | -0.63265900 |
| C  | 4.94898700  | -1.50510400 | 0.32144600  |
| H  | 3.08736600  | -0.73794400 | 1.06302500  |
| C  | 4.82699200  | -3.62401800 | -0.83566300 |
| H  | 2.88795300  | -4.50429600 | -1.01522300 |
| C  | 5.57363000  | -2.54376100 | -0.36136200 |
| H  | 5.52359700  | -0.66320800 | 0.68744600  |
| H  | 5.31859000  | -4.42842300 | -1.36828600 |
| H  | 6.64357300  | -2.51504400 | -0.52830600 |

Table S87. Calculated Gibbs free energy and XYZ coordinates for all atoms in **TS2d-exo** catalysed by ICl.

|   | $G = -1868.7784$ Hartree | Frequency = $-215.35$ $\text{cm}^{-1}$ |             |
|---|--------------------------|----------------------------------------|-------------|
| C | 2.60423600               | 1.56357100                             | -0.29495600 |
| C | 1.68979500               | 1.85871400                             | 0.72390500  |
| C | 2.07449900               | 2.63762500                             | 1.80083800  |
| C | 3.38890900               | 3.10587400                             | 1.85799500  |
| C | 4.28849600               | 2.80368000                             | 0.83774400  |
| C | 3.91126400               | 2.02780600                             | -0.25900700 |
| C | 0.71248000               | 0.38306700                             | -0.83376500 |
| C | 0.37989700               | 1.22757100                             | 0.37195900  |
| H | 1.36383000               | 2.88404500                             | 2.58171600  |
| H | 3.70858400               | 3.71254600                             | 2.69560800  |
| H | 5.30333300               | 3.17938300                             | 0.89224800  |
| H | 4.61279600               | 1.79257300                             | -1.05012700 |
| H | -0.09288400              | 0.67326200                             | 1.17999000  |
| C | -0.02653600              | -0.59510300                            | -1.39122800 |
| H | 0.39523000               | -1.13753300                            | -2.23032400 |
| C | -1.40331800              | -0.95305800                            | -0.94410100 |
| H | -1.97539800              | -0.05980700                            | -0.68172800 |
| H | -1.94354600              | -1.44885700                            | -1.75261200 |
| N | 1.98482100               | 0.75395300                             | -1.24077800 |
| C | -3.15751300              | -3.59558900                            | 0.22576500  |
| C | -2.98900300              | -2.24501200                            | 0.52256000  |
| C | -4.09394300              | -1.46768500                            | 0.82538900  |
| C | -5.34638800              | -2.08142900                            | 0.84159500  |
| C | -5.48976700              | -3.43779300                            | 0.54581000  |
| C | -4.38857800              | -4.22794800                            | 0.22573800  |
| C | -0.91937200              | -3.23673500                            | 0.08590900  |
| C | -1.54121900              | -1.89374000                            | 0.33332700  |
| H | -3.99181800              | -0.41127400                            | 1.04446900  |
| H | -6.22324300              | -1.49451700                            | 1.08341900  |
| H | -6.47506600              | -3.88600400                            | 0.56181900  |
| H | -4.49245700              | -5.27907000                            | -0.01062100 |
| H | -1.09603900              | -1.39004100                            | 1.19343500  |
| C | 0.46025500               | -3.51928200                            | -0.07737100 |
| H | 0.74009900               | -4.47431700                            | -0.50709000 |
| C | 1.38202400               | -2.58625600                            | 0.27447300  |
| H | 1.03278800               | -1.70177900                            | 0.79418400  |
| N | -1.88078400              | -4.13670300                            | -0.04291500 |
| H | 2.47279800               | 0.29978500                             | -1.99707800 |
| H | -1.71369900              | -5.11361800                            | -0.25659200 |



|    |             |             |             |
|----|-------------|-------------|-------------|
| I  | -1.12249200 | 2.75996300  | -0.14659900 |
| Cl | -3.33823400 | 4.85759500  | -0.83237000 |
| C  | 2.81604200  | -2.62651700 | 0.05828400  |
| C  | 3.57771000  | -1.54789700 | 0.53179500  |
| C  | 3.45831700  | -3.66660900 | -0.63265900 |
| C  | 4.94898700  | -1.50510400 | 0.32144600  |
| H  | 3.08736600  | -0.73794400 | 1.06302500  |
| C  | 4.82699200  | -3.62401800 | -0.83566300 |
| H  | 2.88795300  | -4.50429600 | -1.01522300 |
| C  | 5.57363000  | -2.54376100 | -0.36136200 |
| H  | 5.52359700  | -0.66320800 | 0.68744600  |
| H  | 5.31859000  | -4.42842300 | -1.36828600 |
| H  | 6.64357300  | -2.51504400 | -0.52830600 |

Table S88. Calculated Gibbs free energy and XYZ coordinates for all atoms in **2d-exo** catalysed by ICl.

$G = -1868.8123$  Hartree

|   |             |             |             |
|---|-------------|-------------|-------------|
| C | 2.60423600  | 1.56357100  | -0.29495600 |
| C | 1.68979500  | 1.85871400  | 0.72390500  |
| C | 2.07449900  | 2.63762500  | 1.80083800  |
| C | 3.38890900  | 3.10587400  | 1.85799500  |
| C | 4.28849600  | 2.80368000  | 0.83774400  |
| C | 3.91126400  | 2.02780600  | -0.25900700 |
| C | 0.71248000  | 0.38306700  | -0.83376500 |
| C | 0.37989700  | 1.22757100  | 0.37195900  |
| H | 1.36383000  | 2.88404500  | 2.58171600  |
| H | 3.70858400  | 3.71254600  | 2.69560800  |
| H | 5.30333300  | 3.17938300  | 0.89224800  |
| H | 4.61279600  | 1.79257300  | -1.05012700 |
| H | -0.09288400 | 0.67326200  | 1.17999000  |
| C | -0.02653600 | -0.59510300 | -1.39122800 |
| H | 0.39523000  | -1.13753300 | -2.23032400 |
| C | -1.40331800 | -0.95305800 | -0.94410100 |
| H | -1.97539800 | -0.05980700 | -0.68172800 |
| H | -1.94354600 | -1.44885700 | -1.75261200 |
| N | 1.98482100  | 0.75395300  | -1.24077800 |
| C | -3.15751300 | -3.59558900 | 0.22576500  |
| C | -2.98900300 | -2.24501200 | 0.52256000  |
| C | -4.09394300 | -1.46768500 | 0.82538900  |
| C | -5.34638800 | -2.08142900 | 0.84159500  |
| C | -5.48976700 | -3.43779300 | 0.54581000  |

|    |             |             |             |
|----|-------------|-------------|-------------|
| C  | -4.38857800 | -4.22794800 | 0.22573800  |
| C  | -0.91937200 | -3.23673500 | 0.08590900  |
| C  | -1.54121900 | -1.89374000 | 0.33332700  |
| H  | -3.99181800 | -0.41127400 | 1.04446900  |
| H  | -6.22324300 | -1.49451700 | 1.08341900  |
| H  | -6.47506600 | -3.88600400 | 0.56181900  |
| H  | -4.49245700 | -5.27907000 | -0.01062100 |
| H  | -1.09603900 | -1.39004100 | 1.19343500  |
| C  | 0.46025500  | -3.51928200 | -0.07737100 |
| H  | 0.74009900  | -4.47431700 | -0.50709000 |
| C  | 1.38202400  | -2.58625600 | 0.27447300  |
| H  | 1.03278800  | -1.70177900 | 0.79418400  |
| N  | -1.88078400 | -4.13670300 | -0.04291500 |
| H  | 2.47279800  | 0.29978500  | -1.99707800 |
| H  | -1.71369900 | -5.11361800 | -0.25659200 |
| I  | -1.12249200 | 2.75996300  | -0.14659900 |
| Cl | -3.33823400 | 4.85759500  | -0.83237000 |
| C  | 2.81604200  | -2.62651700 | 0.05828400  |
| C  | 3.57771000  | -1.54789700 | 0.53179500  |
| C  | 3.45831700  | -3.66660900 | -0.63265900 |
| C  | 4.94898700  | -1.50510400 | 0.32144600  |
| H  | 3.08736600  | -0.73794400 | 1.06302500  |
| C  | 4.82699200  | -3.62401800 | -0.83566300 |
| H  | 2.88795300  | -4.50429600 | -1.01522300 |
| C  | 5.57363000  | -2.54376100 | -0.36136200 |
| H  | 5.52359700  | -0.66320800 | 0.68744600  |
| H  | 5.31859000  | -4.42842300 | -1.36828600 |
| H  | 6.64357300  | -2.51504400 | -0.52830600 |
